# Supplementary material for: Genome-wide analysis of genes encoding core components of the ubiquitin system in soybean (Glycine max) reveals a potential role for ubiquitination in host immunity against soybean cyst nematode
Source: PubMed Central journal article supplement (PMC6052599; doi:10.1186/s12870-018-1365-7), 2018-07-18
Supplement: 12870_2018_1365_MOESM4_ESM.pdf [file 12870_2018_1365_MOESM4_ESM.pdf]

UBE2D2

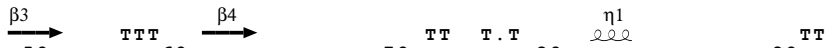

UBE2D2

consensus

- 1c1|Glyma.04G089600\_33-128
1c1|Glyma.06G091400\_33-128
1c1|Glyma.02G199700\_17-143
1c1|Glyma.10G077600\_17-143
1c1|Glyma.03G199900\_17-146
1c1|Glyma.19G197500\_17-154
1c1|Glyma.03G113100\_5-108
1c1|Glyma.15G189500\_8-136
1c1|Glyma.05G235000\_15-150
1c1|Glyma.08G042500\_15-150
1c1|Glyma.07G168100\_15-150
1c1|Glyma.09G124800\_15-150
1c1|Glyma.01G178200\_33-167
1c1|Glyma.11G064000\_33-167
1c1|Glyma.01G043600\_7-145
1c1|Glyma.02G020000\_7-145
1c1|Glyma.04G173300\_7-145
1c1|Glyma.05G028800\_7-145
1c1|Glyma.17G098000\_7-145
1c1|Glyma.08G297300\_7-145
1c1|Glyma.18G124600\_7-111
1c1|Glyma.10G212200\_39-178
1c1|Glyma.20G178900\_39-174
1c1|Glyma.11G095700\_39-155
1c1|Glyma.12G021800\_39-176
1c1|Glyma.05G091100\_9-153
1c1|Glyma.17G169700\_9-153
1c1|Glyma.11G053300\_8-150
1c1|Glyma.01G188900\_8-150
1c1|Glyma.01G169700\_17-117
1c1|Glyma.04G199200\_6-145
1c1|Glyma.06G166300\_6-145
1c1|Glyma.06G230300\_7-146
1c1|Glyma.12G161200\_7-146
1c1|Glyma.13G270800\_7-146
1c1|Glyma.12G228900\_7-108
1c1|Glyma.04G238800\_3-142
1c1|Glyma.13G040500\_3-143
1c1|Glyma.06G124900\_3-142
1c1|Glyma.14G124300\_3-142
1c1|Glyma.03G255400\_3-142
1c1|Glyma.19G253000\_3-142
1c1|Glyma.02G236900\_3-142
1c1|Glyma.14G205700\_3-142
1c1|Glyma.08G267400\_3-142
1c1|Glyma.16G103100\_4-142
1c1|Glyma.11G199400\_3-142
1c1|Glyma.18G051400\_3-142
1c1|Glyma.09G273100\_3-142
1c1|Glyma.18G216000\_3-152
1c1|Glyma.11G107800\_3-142
1c1|Glyma.12G032800\_3-142
1c1|Glyma.10G096200\_3-142
1c1|Glyma.08G113700\_33-171
1c1|Glyma.03G004200\_12-151
1c1|Glyma.19G121700\_12-151
1c1|Glyma.19G072800\_12-151
1c1|Glyma.04G081200\_7-148
1c1|Glyma.06G082900\_7-148
1c1|Glyma.05G035700\_7-143
1c1|Glyma.17G091700\_7-143
1c1|Glyma.05G209400\_10-143
1c1|Glyma.08G016100\_10-143
1c1|Glyma.07G069300\_7-143
1c1|Glyma.16G035000\_7-143
1c1|Glyma.09G257800\_18-145
1c1|Glyma.18G234800\_7-143
1c1|Glyma.05G140200\_172-318
1c1|Glyma.08G095600\_194-340
1c1|Glyma.12G153900\_92-241
1c1|Glyma.12G154000\_8-156
1c1|Glyma.06G243300\_493-619
1c1|Glyma.12G224200\_443-569
1c1|Glyma.13G277400\_462-588
1c1|Glyma.13G239100\_672-825
1c1|Glyma.15G074200\_677-830
1c1|Glyma.13G179600\_679-832
1c1|Glyma.07G196500\_680-833
1c1|Glyma.10G282000\_880-1030
1c1|Glyma.20G107300\_876-1026
1c1|Glyma.07G239100\_38-188
1c1|Glyma.17G034200\_47-149
1c1|Glyma.17G034300\_1-145
1c1|Glyma.17G034400\_40-142
1c1|Glyma.07G046200\_7-157
1c1|Glyma.16G014400\_7-157
1c1|Glyma.07G240600\_12-127
1c1|Glyma.17G032800\_12-151
1c1|Glyma.15G141200\_12-127
1c1|Glyma.09G036300\_12-127
1c1|Glyma.11G099100\_34-153

Sequence alignment of UBE2D2 protein variants. The alignment shows conserved regions across different Glyma accessions. Key motifs are highlighted: beta3 (TTT), beta4 (TT, T.T), and eta1 (222). Residue positions 50, 60, 70, 80, and 90 are indicated. The alignment includes amino acid sequences for each accession, with some residues highlighted in red to indicate conservation or specific mutations.
