# Supplementary material for: Genome-wide analysis of genes encoding core components of the ubiquitin system in soybean (Glycine max) reveals a potential role for ubiquitination in host immunity against soybean cyst nematode
Source: PubMed Central journal article supplement (PMC6052599; doi:10.1186/s12870-018-1365-7), 2018-07-18
Supplement: 12870_2018_1365_MOESM7_ESM.pdf [file 12870_2018_1365_MOESM7_ESM.pdf]

| Human_c-Cbl                   | TTT        | 1            | 10                      |
|-------------------------------|------------|--------------|-------------------------|
| Human_c-Cbl consensus         | .....      | CKICAE       | DVKI.....EP             |
| lcl Glyma.09G103000_21-70     | .....      | PICLEEYL     | KDPV.....ILP            |
| lcl Glyma.15G275000_20-69     | .....      | QICG         | DNIGNNA.....NGDPFIACDV  |
| lcl Glyma.04G067900_40-89     | .....      | QICG         | DNIGNNV.....NGDPFIACDV  |
| lcl Glyma.06G069600_30-98     | .....      | QICG         | DTVGLTA.....TGDVVFACNE  |
| lcl Glyma.13G202500_20-69     | PLKSLNGQI  | QICG         | DTVGLTA.....TGDVVFACNE  |
| lcl Glyma.02G080900_38-87     | .....      | QICS         | DVGKTV.....DGEFFVACDV   |
| lcl Glyma.16G165900_30-96     | .....      | QICG         | DELEVTV.....NGEPPFVACNE |
| lcl Glyma.05G187300_39-88     | TELSGQI    | QICG         | DELEVTV.....NGEPPFVACNE |
| lcl Glyma.08G145600_39-88     | .....      | QICG         | DEIEITV.....DGEFFVACNE  |
| lcl Glyma.10G223500_41-90     | .....      | QICG         | DEIEITV.....DGEFFVACNE  |
| lcl Glyma.02G205800_37-86     | .....      | EICG         | DDVGLTV.....DGDLFVACNE  |
| lcl Glyma.17G072200_27-95     | PLKKNLDGQV | EICG         | DDVGLTV.....DGDLFVACNE  |
| lcl Glyma.04G153700_37-86     | .....      | EICG         | DVGGLTV.....DGDLFVACNE  |
| lcl Glyma.06G225500_37-86     | .....      | EICG         | DVGGLTV.....DGDLFVACNE  |
| lcl Glyma.04G142700_37-86     | .....      | EICG         | DSVGLTV.....DGDLFVACNE  |
| lcl Glyma.06G225400_46-117    | KPVKNLDGQL | EICG         | DSVGLTV.....DGDLFVACNE  |
| lcl Glyma.06G316800_40-89     | .....      | QLCG         | DDIGVNE.....DGDLFVACNE  |
| lcl Glyma.09G051100_38-87     | .....      | RVCG         | DEIGYKE.....NGELFVACHV  |
| lcl Glyma.15G157100_38-87     | .....      | RVCG         | DEIGYME.....NGELFVACHV  |
| lcl Glyma.08G088400_32-81     | .....      | RVCG         | DEIGYGE.....DGKLFVACHV  |
| lcl Glyma.08G302500_39-88     | .....      | QICG         | DTIGLTA.....TGDVVFACHE  |
| lcl Glyma.18G117100_39-88     | .....      | QICG         | DTIGLTA.....TGDVVFACHE  |
| lcl Glyma.04G063800_9-58      | .....      | NSCG         | EQIGLDA.....NGELFVACHE  |
| lcl Glyma.06G065000_6-58      | .....      | HFNSCG       | EQIGLDA.....NGELFVACHE  |
| lcl Glyma.05G160000_385-436   | .....      | PLNNTCG      | EQVGLNA.....NGEVFVACHE  |
| lcl Glyma.08G117500_6-58      | .....      | PLNNTCG      | EQVGLND.....NGEVFVACHE  |
| lcl Glyma.12G017600_131-178   | .....      | PLGCD        | CKVMSDE.....HGEDI LPC   |
| lcl Glyma.02G090900_13-60     | .....      | CRICHDE      | DEES.....NMDTPC         |
| lcl Glyma.18G292200_14-61     | .....      | CRICHDE      | DEES.....NMDTPC         |
| lcl Glyma.18G242400_64-112    | .....      | CRICQEE      | DFIF.....NMESPC         |
| lcl Glyma.02G103800_77-125    | .....      | CRICRNP      | DAEN.....PLRYPC         |
| lcl Glyma.07G215200_80-128    | .....      | CRICRNP      | DAEN.....PLRYPC         |
| lcl Glyma.13G372600_71-120    | .....      | CRICLDI      | GGE.....DLIAPC          |
| lcl Glyma.15G001100_69-118    | .....      | CRICLDI      | GGE.....DLIAPC          |
| lcl Glyma.11G236400_33-82     | .....      | CRICLET      | DGR.....DFIAPC          |
| lcl Glyma.18G020800_33-82     | .....      | CRICLET      | DGR.....DFIAPC          |
| lcl Glyma.05G182200_29-78     | .....      | CRICLET      | DGR.....NFIVPC          |
| lcl Glyma.05G010700_54-89     | .....      | RICLES       | DSDP                    |
| lcl Glyma.17G118400_55-107    | .....      | RICLES       | DSDP                    |
| lcl Glyma.02G310000_267-316   | .....      | RICLVELG     | EGGNT.....LKMEC         |
| lcl Glyma.14G002700_268-317   | .....      | RICLVELG     | EGGNT.....LKMEC         |
| lcl Glyma.03G180200_231-280   | .....      | RICLIELG     | EGSDT.....LKMEC         |
| lcl Glyma.19G180900_243-292   | .....      | RICLIELG     | EGSDT.....LKMEC         |
| lcl Glyma.13G005300_253-302   | .....      | RICLVELV     | EGGNT.....LRMEC         |
| lcl Glyma.20G064600_253-302   | .....      | RICLVELA     | EGGNT.....LRMEC         |
| lcl Glyma.11G147100_266-315   | .....      | RICLVDL      | EGGET.....FKLEC         |
| lcl Glyma.12G068000_266-315   | .....      | RICLVDL      | EGGET.....FKLEC         |
| lcl Glyma.12G173300_234-283   | .....      | RICLVDL      | EGGET.....LKMEC         |
| lcl Glyma.13G326500_259-308   | .....      | RICLVDL      | EGGET.....LKMEC         |
| lcl Glyma.10G051800_240-289   | .....      | RICMVELG     | EGGNT.....FKLEC         |
| lcl Glyma.13G139200_260-309   | .....      | RICFVELG     | EGADT.....FKLEC         |
| lcl Glyma.13G213600_217-265   | .....      | RICFVDC      | DERNT.....FKMEC         |
| lcl Glyma.15G099100_214-262   | .....      | RICFVDC      | DERNT.....FKMEC         |
| lcl Glyma.01G107700_99-151    | .....      | RICHLG       | LESDD.S.QEESGVP         |
| lcl Glyma.U027600_104-157     | .....      | RICHLG       | LESDD.S.QEESGVP         |
| lcl Glyma.07G142300_108-159   | .....      | RICHMG       | LESDD.S.HESGAP          |
| lcl Glyma.02G253000_84-135    | .....      | RICHLS       | MDMT.NHESGTP            |
| lcl Glyma.14G063500_84-135    | .....      | RICHLS       | MDMT.NHESGTS            |
| lcl Glyma.13G227900_172-233   | .....      | RICHLTSVQSLD | TTVGTASSAKS.A           |
| lcl Glyma.15G084600_183-244   | .....      | RICHLTSVQSSD | TTVGTASSATS.A           |
| lcl Glyma.04G063700_161-222   | .....      | RICHLTSVQSSD | TTVGTASSATS.A           |
| lcl Glyma.06G064900_158-219   | .....      | RICHLTSVQSSD | TTVGTASSATS.A           |
| lcl Glyma.05G159600_181-243   | .....      | RICHLASG     | PPLEAADVGTASSATTNT      |
| lcl Glyma.04G084500_138-184   | .....      | CPVLEEMG     | KEQN.....LVACG          |
| lcl Glyma.06G086100_152-198   | .....      | CPVLEEMG     | KEQN.....LVACG          |
| lcl Glyma.02G232900_1829-1880 | .....      | CPICYSVH     | .....TNHG               |
| lcl Glyma.01G095300_99-145    | .....      | CAICL        | LEFEDDN.....VLRLLTL     |
| lcl Glyma.08G270800_99-145    | .....      | CAICL        | LEFEDDN.....MVRLLTL     |
| lcl Glyma.01G017200_110-156   | .....      | CAICL        | LEFHDSD.....MLRLLTV     |
| lcl Glyma.02G210700_138-184   | .....      | CAVCL        | NEFLDDE.....TLRLIPK     |
| lcl Glyma.14G178400_137-183   | .....      | CAVCL        | NEFRDDE.....TLRLIPK     |
| lcl Glyma.04G098100_128-174   | .....      | CAVCL        | NEFEDE.....TLRFIPN      |
| lcl Glyma.06G099800_131-177   | .....      | CAVCL        | NEFEVE.....TLRFIPN      |
| lcl Glyma.10G156500_116-162   | .....      | CAVCL        | NEFEDTE.....TLRLIPK     |
| lcl Glyma.20G231900_117-163   | .....      | CAVCL        | NEFEDTE.....TLRLIPK     |
| lcl Glyma.19G236800_118-164   | .....      | CAVCL        | CEFEDTE.....TLRLIPK     |
| lcl Glyma.03G239900_110-156   | .....      | CAVCL        | CEFEDTE.....TLRLIPK     |
| lcl Glyma.09G140700_126-172   | .....      | CAVCL        | TDFDKD.....ALRLLPK      |
| lcl Glyma.16G194600_116-162   | .....      | CAVCL        | TDFTHKD.....SIRLLPK     |
| lcl Glyma.09G140800_108-154   | .....      | CAVCL        | AEFDDAD.....ALRLLPK     |
| lcl Glyma.11G242800_110-156   | .....      | CAVCL        | VEFEDSD.....TIKMLPK     |
| lcl Glyma.14G037000_80-126    | .....      | CAVCL        | GEFEDCD.....VVKMLPK     |
| lcl Glyma.06G118400_62-106    | .....      | CAVCL        | SEFECD.....SVKIQPK      |
| lcl Glyma.01G017300_141-187   | .....      | CSVCL        | SEFQDDE.....SVRLLPK     |
| lcl Glyma.09G205600_131-177   | .....      | CSVCL        | SEFRDDE.....SVRLLPK     |
| lcl Glyma.01G095600_140-186   | .....      | CSVCL        | SEFQDDE.....SVRLLPK     |
| lcl Glyma.08G271100_141-187   | .....      | CSVCL        | SEFEDDE.....SVRLLPK     |
| lcl Glyma.04G128100_143-189   | .....      | CSVCL        | SEFEENE.....DLRLLPK     |
| lcl Glyma.06G310600_135-181   | .....      | CSVCL        | IEFQENE.....NLRLLPK     |
| lcl Glyma.02G210400_152-198   | .....      | CSVCL        | NEFQEEE.....TLRLLPK     |
| lcl Glyma.14G177900_153-199   | .....      | CSVCL        | NEFQEEE.....TLRLLPK     |
| lcl Glyma.08G070100_155-204   | .....      | GTECSVCL     | SEFQEDE.....SLRLLPK     |
| lcl Glyma.13G042300_156-201   | .....      | CSVCL        | SEFQEDE.....SLRLLPK     |
| lcl Glyma.08G177000_180-226   | .....      | CAVCL        | SEFQEDE.....NLRLLPK     |
| lcl Glyma.15G056000_166-212   | .....      | CAVCL        | SEFQEDE.....NLRLLPK     |
| lcl Glyma.05G175400_149-200   | .....      | GTECSVCL     | GEFEHDE.....SLRLLPK     |
| lcl Glyma.18G014500_194-240   | .....      | LVCL         | GEFQEEE.....SLRLLPK     |
| lcl Glyma.18G014600_153-202   | .....      | ETELVCL      | GEFHQEE.....SLRLLPK     |
| lcl Glyma.11G242500_156-205   | .....      | ESELVCL      | GEFQEEE.....SLRLLPK     |
| lcl Glyma.11G122400_135-179   | .....      | DCAVCL       | LEFEDDE.....YVRTLPI     |
| lcl Glyma.12G047300_133-176   | .....      | AVCL         | LEFEDED.....YVRTLPV     |

|                             |          |         |         |      |
|-----------------------------|----------|---------|---------|------|
| lcl Glyma.01G032200_147-191 | CAVCL    | CEFLEQD | KLRLLPM | CNHA |
| lcl Glyma.02G033200_149-193 | CAVCL    | CEFLEQD | KLRLLPM | CNHA |
| lcl Glyma.13G071600_172-216 | CAVCL    | CEFSEKD | KLRLLPM | CSHA |
| lcl Glyma.19G011200_168-212 | CAVCL    | CEFSEKD | KLRLLPM | CSHA |
| lcl Glyma.08G289200_148-194 | CAVCL    | COFSEQD | MLRLLPL | CNHA |
| lcl Glyma.18G135300_149-195 | CAVCL    | COFSEQD | MLRLLPL | CNHA |
| lcl Glyma.05G035800_139-185 | CAVCL    | CEFSKED | KLRLLPM | CTHA |
| lcl Glyma.17G091600_134-180 | CAVCL    | CEFSKED | KLRLLPM | CTHA |
| lcl Glyma.13G092000_129-175 | CAVCL    | CEFEPEP | KLRLLPK | CSHA |
| lcl Glyma.17G068300_125-171 | CAVCL    | CEFEPEP | KLRLLPK | CSHA |
| lcl Glyma.03G103800_137-183 | CAVCL    | SKFHHD  | LLRLLPL | CCHA |
| lcl Glyma.07G120300_138-184 | CAVCL    | SKFHHD  | LLRLLPL | CCHA |
| lcl Glyma.15G183300_121-167 | CAVCL    | SKFEQND | LLRLLPL | CCHA |
| lcl Glyma.01G146500_110-156 | GLECAVCL | SKFEDVE | ILRLLPK | CKHA |
| lcl Glyma.09G194100_115-161 | GLECAVCL | SKFEDVE | ILRLLPK | CKHA |
| lcl Glyma.04G083400_113-140 | CTVCL    | SKFEDTE | ILRLLPK | CKHA |
| lcl Glyma.06G084800_126-176 | GLECTVCL | SKFEDTE | ILRLLPK | CKHA |
| lcl Glyma.14G146700_132-182 | GLECTVCL | SKFEDTE | ILRLLPK | CKHT |
| lcl Glyma.02G106400_97-139  | CAVCL    | NKFVKAK | VLRLLSK | CKHA |
| lcl Glyma.04G091400_117-163 | CAVCL    | NKFVAAE | VLRLLPK | CKHA |
| lcl Glyma.03G215500_93-139  | CAVCL    | SEFADGD | EGRVLPN | CKHA |
| lcl Glyma.19G212000_90-136  | CAVCL    | SEFSDGD | EGRVLPN | CKHS |
| lcl Glyma.02G016800_86-132  | CAVCL    | SEFADGE | EGRFLPN | CNHA |
| lcl Glyma.07G046400_108-154 | CAVCL    | SEIVQGE | KLRLLPK | CNHG |
| lcl Glyma.16G014600_107-153 | CAVCL    | SEIVEGE | KLRLLPK | CNHG |
| lcl Glyma.03G263000_99-148  | GLECAVCL | SEVVEGE | KARLLPK | CNHG |
| lcl Glyma.07G245400_93-139  | CAVCL    | SEFENGE | TGRVLPK | CNHS |
| lcl Glyma.17G028400_95-141  | CAVCL    | SEFENGE | TGRVLPK | CNHS |
| lcl Glyma.09G042400_118-164 | CAVCL    | SEFEPGE | TGRVLPK | CNHS |
| lcl Glyma.13G332800_88-134  | CAICL    | GEFEAGE | WLKLLPN | CTHG |
| lcl Glyma.06G284600_119-165 | CAVCL    | SALEGEE | KAKLLPN | CNHF |
| lcl Glyma.12G121400_124-171 | CAVCL    | SALEGEE | KAKLLPN | CNHF |
| lcl Glyma.12G208600_102-147 | CAVCL    | SVLEEGE | HVRLLPN | CKHS |
| lcl Glyma.13G292600_94-142  | SVECTVCL | SVLEEGE | QVRLLPN | CKHS |
| lcl Glyma.09G214600_99-144  | CAVCL    | GDFEDGE | ELRTMPE | CMHS |
| lcl Glyma.16G075300_86-130  | TCAVCL   | EEFEAGE | ELRRLPE | CMHF |
| lcl Glyma.13G108500_112-158 | CPVCL    | SGFEAGE | EVRKLPR | CKHW |
| lcl Glyma.17G050900_108-154 | CPVCL    | SGFEAGE | EVRKLPR | CKHW |
| lcl Glyma.18G176200_157-203 | CPVCL    | SVFANGE | EVRQLSA | CKHS |
| lcl Glyma.02G228800_114-163 | ESECVICL | SVIEEGE | IGRGLPK | CCHA |
| lcl Glyma.01G157400_104-150 | CAICL    | ADFAAGD | EIRVLPQ | CGHG |
| lcl Glyma.11G087600_104-150 | CAICL    | AEEAAGD | EIRVLPQ | CGHG |
| lcl Glyma.04G015200_96-142  | CAICL    | TEFAAGD | EIRVLPQ | CGHG |
| lcl Glyma.06G015200_96-142  | CAICL    | TEFAAGD | EIRVLPQ | CGHG |
| lcl Glyma.09G196700_100-146 | CAICL    | TEFGAGD | EVRVLPQ | CGHG |
| lcl Glyma.16G112200_99-145  | CAICL    | TEFGAGD | EIRVLPQ | CGHG |
| lcl Glyma.04G215600_139-185 | CVICL    | SEFTSGD | KVRILPK | CNHR |
| lcl Glyma.06G150400_141-187 | CVICL    | SEFTSGE | KVRILPK | CNHG |
| lcl Glyma.05G188900_144-190 | CVICL    | SEFANGD | KVRILPK | CNHG |
| lcl Glyma.08G146600_143-189 | CVICL    | SEFANGD | KVRILPK | CNHG |
| lcl Glyma.09G275300_113-159 | CPICL    | GEFEKGD | KVRMLPK | CNHG |
| lcl Glyma.18G214200_108-154 | CPICL    | GEFEKGD | KVRMLPK | CNHG |
| lcl Glyma.07G173600_79-113  | CPICL    | DE      | DE      | CNHG |
| lcl Glyma.06G143100_111-157 | CPICL    | GEFVDGE | KVRVLPK | CNHG |
| lcl Glyma.08G088100_109-152 | VIICL    | AEFSDGD | PIRFLPK | CNHY |
| lcl Glyma.15G157400_108-152 | ICAVICL  | TEFSDGD | RIRFLPN | CNHR |
| lcl Glyma.04G182100_194-239 | CLICL    | EEFHVGN | QVRGLP  | CAHN |
| lcl Glyma.06G183300_233-278 | CLICL    | EEFHVGN | QVRGLP  | CAHN |
| lcl Glyma.05G037000_234-279 | CPICL    | EEFYVGN | EVRGLP  | CAHN |
| lcl Glyma.17G090200_234-279 | CPICL    | EEFYVGN | EVRGLP  | CAHN |
| lcl Glyma.11G191800_129-174 | CAICL    | EELREGD | AVKVIPY | CKHV |
| lcl Glyma.01G151700_511-557 | CVICL    | VEYEDGD | SMRVLP  | CHHE |
| lcl Glyma.09G216900_511-557 | CVICL    | VEYEDGD | SMRVLP  | CHHE |
| lcl Glyma.16G076000_519-565 | CVICL    | VEYEDGD | NMRVLP  | CHHE |
| lcl Glyma.16G107700_522-568 | CVICL    | VEYEDGD | NMRVLP  | CHHE |
| lcl Glyma.13G165500_478-524 | CVICL    | ADYEEDG | QIRVLP  | CFHE |
| lcl Glyma.17G105500_479-525 | CVICL    | ADYEEDG | QIRVLP  | CFHE |
| lcl Glyma.01G217300_329-374 | CCICL    | SSYDDGV | ELRELP  | CGHH |
| lcl Glyma.11G026000_332-377 | CCICL    | SSYDDGV | ELRELP  | CGHH |
| lcl Glyma.05G048800_325-370 | CCICL    | SAYDDGV | ELRQLP  | CGHH |
| lcl Glyma.17G130700_323-368 | CCICL    | SAYDDGV | ELRQLP  | CSHH |
| lcl Glyma.09G265600_314-359 | CCICL    | SAYDDGA | ELRELP  | CNHH |
| lcl Glyma.18G225500_320-365 | CCICL    | SAYDNDG | ELRELP  | CNHH |
| lcl Glyma.02G085200_305-350 | CCICL    | CSYEDGA | ELHALP  | CNHH |
| lcl Glyma.07G170200_304-349 | CCICL    | CSYEDGA | ELHALP  | CNHH |
| lcl Glyma.05G238900_292-337 | CCICI    | SSYEDGA | ELHVLP  | CNHH |
| lcl Glyma.08G046000_293-338 | CCICI    | SSYEDGA | ELHVLP  | CNHH |
| lcl Glyma.03G120200_273-318 | CCICL    | CPYVEGA | ELYRLP  | CTHH |
| lcl Glyma.19G124800_275-320 | CCICL    | CPYVEGE | ELYRLP  | CTHH |
| lcl Glyma.02G302400_289-335 | DPECCICL | AKYKDEE | EVRQLP  | CSHM |
| lcl Glyma.14G011800_289-335 | DPECCICL | AKYKDEE | EVRQLP  | CSHM |
| lcl Glyma.08G332300_279-325 | DPECCICL | AKYKDEE | EVRQLP  | CSHL |
| lcl Glyma.18G074600_278-324 | DPECCICL | AKYKDEE | EVRQLP  | CSHL |
| lcl Glyma.13G361000_365-409 | CCICL    | AKYADDD | ELRELP  | CSHV |
| lcl Glyma.15G012900_392-436 | CCICL    | AKYADDD | ELRELP  | CSHF |
| lcl Glyma.14G129100_343-387 | CCICL    | AKYENND | ELRELP  | CSHL |
| lcl Glyma.17G203800_375-419 | CCICL    | AKYENND | ELRELP  | CSHL |
| lcl Glyma.01G162900_187-232 | SVCL     | QDFMLGE | TVRSLPH | CHHM |
| lcl Glyma.11G080500_187-232 | SVCL     | QDFMLGE | TVRSLPH | CHHM |
| lcl Glyma.02G044300_186-231 | SVCL     | QDFMLGE | TGRSLPH | CHHI |
| lcl Glyma.04G143800_84-127  | CSICF    | QDFEEDG | FVRTLPK | CGHF |
| lcl Glyma.08G316400_182-225 | CSICF    | QDFEYEE | FVRTLPK | CGHF |
| lcl Glyma.18G096600_201-244 | CSICF    | QDFEEDG | FVRTLPK | CGHF |
| lcl Glyma.02G291200_187-233 | CSICF    | QDFEDGE | LVRILPK | CDHL |
| lcl Glyma.05G025200_170-216 | CAICL    | QDIEVGE | IARSLPR | CHHT |
| lcl Glyma.17G101800_167-213 | CAICL    | QDIEVGE | IARSLPR | CHHT |
| lcl Glyma.10G124600_688-735 | CAICL    | ETPVQGE | IRHSLP  | CLHK |
| lcl Glyma.20G076700_718-765 | CAICL    | ETPVQGE | IRHSLP  | CLHK |
| lcl Glyma.10G217500_232-277 | CAICL    | EDYCVGE | KLRILP  | CCHK |
| lcl Glyma.20G174500_247-292 | CAICL    | EDYCVGE | KLRILP  | CCHK |
| lcl Glyma.11G137400_208-259 | ELTCTICL | DQVKRGE | LVRSLP  | CLHQ |
| lcl Glyma.12G060800_236-287 | ELTCTICL | DQVKRGE | LVRSLP  | CLHQ |
| lcl Glyma.11G220200_212-254 | ELTCTICL | EQVDVGD | VLRSLP  | CLHQ |

|                             |           |         |         |      |
|-----------------------------|-----------|---------|---------|------|
| lc1 Glyma.18G037200_212-254 | SVCL      | EQVNVGD | VLRSLP  | CLHQ |
| lc1 Glyma.02G194400_103-147 | SICL      | GDYKGS  | LLRVLPD | CDHV |
| lc1 Glyma.10G083100_103-147 | SICL      | GDYKGS  | FLRVLPD | CDHV |
| lc1 Glyma.03G203400_104-149 | CSICL     | ADYKGT  | MLRMLPD | CGHQ |
| lc1 Glyma.10G121100_107-150 | CSICL     | ADYKDT  | CVKLLSN | CGHL |
| lc1 Glyma.10G121500_113-160 | LC CSICL  | ADYKNT  | WLKLLPD | CGHM |
| lc1 Glyma.03G017500_84-127  | CVICL     | AEYKEKE | LLRIIPK | CGHT |
| lc1 Glyma.07G078800_84-127  | CVICL     | AEYKEKE | LLRIIPK | CGHT |
| lc1 Glyma.09G264300_89-135  | CVICL     | ADYKERE | LLRIIPK | CGHT |
| lc1 Glyma.18G227700_89-135  | CVICL     | ADYRERE | VLRIMP  | CGHT |
| lc1 Glyma.10G202500_86-132  | CTVCL     | SEYQGED | MLRILPY | CGHS |
| lc1 Glyma.20G187900_86-132  | CTVCL     | SEYQGED | MLRILPY | CGHS |
| lc1 Glyma.09G001600_110-156 | CSVCL     | LDYQAE  | LLQOIPA | CGHT |
| lc1 Glyma.05G217000_334-378 | TAICL     | SEYQPK  | TLRSIPE | CNHY |
| lc1 Glyma.08G022900_332-375 | CAICL     | CEYEAK  | TLRSIPE | CNHY |
| lc1 Glyma.07G056200_314-357 | CVICL     | SEYNSKE | TLRIPE  | CKHC |
| lc1 Glyma.16G025100_320-363 | CWICL     | SEYNSKE | TLRIPE  | CKHC |
| lc1 Glyma.19G255700_319-362 | CTICL     | SEYKTK  | TLRIPE  | CAHC |
| lc1 Glyma.06G127300_326-371 | CSICL     | SEYIPKE | TVKTIPE | CGHC |
| lc1 Glyma.07G062800_119-162 | CSICL     | CEYKDS  | MLRMPPE | CRHY |
| lc1 Glyma.16G030900_115-158 | CSICL     | CEYKDS  | MLRMPPE | CRHY |
| lc1 Glyma.09G253500_112-155 | CSICL     | CEYKDS  | MLRMPPE | CRHY |
| lc1 Glyma.18G239400_89-132  | CSICL     | CEYKDS  | MLRMPPE | CRHY |
| lc1 Glyma.09G253400_107-153 | CSICI     | EDYEDSE | MLRMPPE | CRHY |
| lc1 Glyma.02G264800_105-151 | CSICL     | GVFADGE | KLKVLPG | CDHS |
| lc1 Glyma.14G058000_100-146 | CSICL     | GAFADGE | KLKVLPG | CDHS |
| lc1 Glyma.11G231400_107-153 | CSICL     | GEFRDGE | KVKVLP  | CDHY |
| lc1 Glyma.18G025700_107-153 | CSICL     | GEFRDGE | KVKVLP  | CDHY |
| lc1 Glyma.11G169500_92-138  | CSICL     | SLFRGNE | KLKVLIE | CEHV |
| lc1 Glyma.18G060400_108-154 | CSICL     | SLFQSN  | KLKVLIE | CEHV |
| lc1 Glyma.01G093800_57-96   | CAVCL     | SKFGER  | EVIRVMR | CEHV |
| lc1 Glyma.04G153400_57-104  | CAVCL     | SKFGER  | EVIRVMR | CEHV |
| lc1 Glyma.04G153500_74-120  | DCAVCL    | CKMGETE | ERITLRL | CGHV |
| lc1 Glyma.13G115900_83-134  | CAVCL     | SQSVED  | EVRELMN | CYHV |
| lc1 Glyma.17G043900_85-135  | CAVCL     | SQSVED  | EVRELMN | CYHV |
| lc1 Glyma.01G221300_81-127  | AVCL      | YEFEGED | EIRRLTN | CRHI |
| lc1 Glyma.11G022400_87-133  | AVCL      | YEFEGED | EIRRLTN | CRHI |
| lc1 Glyma.05G210000_86-133  | AVCL      | SEFEEND | EIRRLAN | CRHI |
| lc1 Glyma.08G016700_85-132  | AVCL      | SEFEEND | EIRRLAN | CRHI |
| lc1 Glyma.17G159400_72-117  | SACVCL    | YEFEGED | EIRWLTN | YRHI |
| lc1 Glyma.02G223600_99-145  | CSVCL     | TFEPES  | ENRSL   | CGHL |
| lc1 Glyma.14G190300_98-144  | CSVCL     | TFEPES  | ENRSL   | CGHL |
| lc1 Glyma.13G009100_96-142  | CCVCL     | TKFEPES | ENCLSL  | CGHI |
| lc1 Glyma.05G182000_68-114  | CRVCL     | SEFQEG  | KVRNLN  | CRHT |
| lc1 Glyma.08G139700_68-114  | CRVCL     | SEFQEG  | KVRNLN  | CRHT |
| lc1 Glyma.11G236600_73-119  | CRVCL     | SEFEEG  | KVRKLK  | CQHT |
| lc1 Glyma.18G020400_70-116  | CRVCL     | SEFEQGE | KLKRLK  | CQHT |
| lc1 Glyma.05G218700_107-152 | CVCL      | GEFELKE | ELLQIPY | CKHV |
| lc1 Glyma.08G024800_108-153 | CVCL      | GEFELNE | ELLQIPY | CNHV |
| lc1 Glyma.13G002800_104-153 | DSL CVCL  | GEFELKE | ELVQIPY | CKHV |
| lc1 Glyma.20G066300_104-153 | DSL CVCL  | GEFELKE | ELVQIPY | CKHV |
| lc1 Glyma.10G007200_117-163 | CSVCL     | SEFQDE  | KLRVIPN | CSHV |
| lc1 Glyma.20G088900_139-185 | CSVCL     | SEFQDE  | KLRVIPN | CSHV |
| lc1 Glyma.10G187100_136-182 | CAVCL     | NEFQED  | KLRVIPN | CSHV |
| lc1 Glyma.20G203400_135-181 | CAVCL     | NEFQED  | KLRIIPN | CSHV |
| lc1 Glyma.19G163600_128-173 | VVCL      | TEFQEH  | MLKALPI | CKHA |
| lc1 Glyma.11G243400_93-139  | CCVCL     | CRFEDNQ | EVSELP  | CKHY |
| lc1 Glyma.18G013800_88-132  | CCVCL     | CRFEANQ | EVSELP  | CKHY |
| lc1 Glyma.13G232800_104-150 | CSVCL     | GTIVEDT | ISRVLPN | CKHI |
| lc1 Glyma.13G232800_105-147 | SVCL      | GTIVEDT | ISRVLPN | CKHI |
| lc1 Glyma.15G079900_101-151 | VVE CSVCL | GTIVEDA | ITRVLPN | CKHI |
| lc1 Glyma.04G021200_74-120  | CAVCL     | DEIESEQ | PARLVPG | CNHG |
| lc1 Glyma.06G021400_73-119  | CAVCL     | DEIESEQ | PARVVP  | CNHG |
| lc1 Glyma.14G221800_70-116  | CAVCL     | DEIGTEQ | PVRVVP  | CNHA |
| lc1 Glyma.17G260700_70-116  | CAVCL     | DHIGTEQ | PARLVPG | CNHA |
| lc1 Glyma.04G181300_83-127  | CAVCL     | ENFKVGD | VCRLLPN | CGHS |
| lc1 Glyma.06G183600_83-127  | CAVCL     | ENFKIGD | VCRLLPN | CGHS |
| lc1 Glyma.13G170300_69-114  | CAVCL     | ENLITGD | KCRFLPM | CKHS |
| lc1 Glyma.19G010400_71-116  | CAVCL     | ENLITGD | KCRFLPV | CKHS |
| lc1 Glyma.13G092100_125-170 | VVCL      | DAFRNAQ | WCRKLA  | CGHV |
| lc1 Glyma.17G068200_100-145 | VVCL      | DAFRNAQ | WCRKLA  | CGHV |
| lc1 Glyma.10G244900_121-165 | AVCL      | EDLGLEQ | QVMNLS  | CSHK |
| lc1 Glyma.20G149700_120-164 | AVCL      | EDLGQEQ | QVMNLS  | CSHK |
| lc1 Glyma.01G048700_113-166 | DLE CVVCL | EEFGVGG | VAKEMP  | CKHR |
| lc1 Glyma.02G108300_190-234 | CVVCL     | EEFGVGG | VAKEMP  | CKHR |
| lc1 Glyma.02G071200_226-269 | QPVCL     | EDVEVGS | EAKEMP  | CKHK |
| lc1 Glyma.16G152400_225-267 | CTVCL     | EDVEVGS | EAKEMP  | CKHK |
| lc1 Glyma.18G000200_236-278 | CSVCL     | DDFEVGS | EAKEMP  | CKHR |
| lc1 Glyma.02G161600_186-230 | PVCK      | DKFEVGS | EARQMP  | CNHL |
| lc1 Glyma.10G101400_186-230 | PVCK      | DKFELGS | EARQMP  | CNHL |
| lc1 Glyma.02G276700_252-296 | PVCK      | EKFELGT | EAREMP  | CNHI |
| lc1 Glyma.14G039000_202-246 | PVCK      | EKFELGT | EAREMP  | CNHI |
| lc1 Glyma.13G072800_206-250 | PVCK      | ERFELGS | EARKMP  | CNHV |
| lc1 Glyma.13G072900_126-169 | K SVCI    | ERFEVGS | EARKMP  | CDHI |
| lc1 Glyma.04G251600_220-265 | CPVCO     | EEFEVGG | EARELQ  | CKHI |
| lc1 Glyma.08G185400_202-246 | PICK      | DEFLLDM | EARELP  | CKHF |
| lc1 Glyma.15G047300_199-243 | PICK      | DEFELDM | EARELP  | CKHF |
| lc1 Glyma.09G165200_203-248 | CAVCK     | DTFELGE | TAKQIP  | CKHI |
| lc1 Glyma.16G213500_202-247 | CAVCK     | DTFELGE | TAKQIP  | CKHI |
| lc1 Glyma.10G285300_179-224 | CAVCO     | DEFKGS  | KVTQMP  | CKHA |
| lc1 Glyma.20G103700_178-223 | CAVCO     | DEFKGS  | LVTQMP  | CKHA |
| lc1 Glyma.02G249100_188-232 | AVCK      | EPFELST | MAKEMP  | CKHI |
| lc1 Glyma.14G067300_187-231 | AVCK      | EPFELCT | MAKEMP  | CKHI |
| lc1 Glyma.11G220400_185-229 | AVCK      | EAFETST | AVREMP  | CKHI |
| lc1 Glyma.18G037000_174-209 | AVCK      | IDDTHT  | LAMEMP  | CKHI |
| lc1 Glyma.07G134600_158-202 | AVCM      | ENFEINC | DAREMP  | CGHV |
| lc1 Glyma.18G184200_159-203 | AVCM      | ENFEINC | DAREMP  | CGHV |
| lc1 Glyma.11G137300_184-228 | AVCK      | EAFELHA | EARELP  | CKHI |
| lc1 Glyma.12G060700_182-226 | AVCK      | EAFELHA | EARELP  | CKHI |
| lc1 Glyma.13G338400_153-197 | AVCK      | EAFELGA | LAREMP  | CKHL |
| lc1 Glyma.15G036100_152-197 | CAVCK     | EAFELGE | LAREMP  | CKHL |
| lc1 Glyma.10G286700_262-306 | AICK      | DLGVDG  | LAKRLP  | CGHG |
| lc1 Glyma.20G102400_259-303 | AICK      | DLGVDG  | AAKRLP  | CGHR |



|                               |                   |                       |            |        |
|-------------------------------|-------------------|-----------------------|------------|--------|
| lcl Glyma.05G017500_280-324   | AVCK              | DEFGVGE               | GKVKLP     | CSHR   |
| lcl Glyma.09G271200_369-413   | AICK              | DVLAPRT               | EVNQLP     | CSHL   |
| lcl Glyma.18G218200_373-417   | AICK              | DVLTPTG               | EVNQLP     | CSHL   |
| lcl Glyma.08G158300_95-136    | AVCK              | DQITPHA               | EAKQLP     | CKHL   |
| lcl Glyma.15G268100_109-150   | AVCK              | DQITLNA               | QAKQLP     | COHL   |
| lcl Glyma.08G034000_52-100    | SVCM              | EGFITQRNTDG           | ENKRPV     | CGHV   |
| lcl Glyma.06G272400_167-215   | RKSCAICL          | EDFDPSE               | EVMLTP     | CNHM   |
| lcl Glyma.12G131800_171-215   | AICL              | EDFEPSE               | EVMLTP     | CNHM   |
| lcl Glyma.06G274300_168-216   | SKSCAICL          | EDFDPSE               | EVMLTP     | CNHM   |
| lcl Glyma.17G213300_14-59     | CAICL             | EDFEPSE               | EVMLTP     | CNHT   |
| lcl Glyma.18G103300_98-136    | AICL              | EDFEPSE               | EVMLTP     | CNHM   |
| lcl Glyma.12G223700_140-184   | ECAICL            | EEFEVQG               | LCQVFE     | CKHI   |
| lcl Glyma.13G277600_139-186   | ECAICM            | EEFKVSQ               | LCQVFE     | CKHI   |
| lcl Glyma.12G151700_161-205   | CAICL             | EDFKKGE               | ECLVFSV    | CGHT   |
| lcl Glyma.13G211100_115-163   | CPICM             | EDFKNGE               | LIQPFVQ    | CVHE   |
| lcl Glyma.17G211800_21-68     | CPICI             | EEFKNGE               | LIQPFVQ    | CVHE   |
| lcl Glyma.10G047200_194-237   | ECVICM            | EEMGIGR               | DVCELP     | COHL   |
| lcl Glyma.13G135100_190-233   | ECVICK            | EEMGIGR               | DVCELP     | COHL   |
| lcl Glyma.08G148600_91-141    | DLMCSICL          | EEFLIGT               | ITIRLPH    | CYHI   |
| lcl Glyma.12G223800_101-147   | CVICL             | ESFITGE               | SCQILP     | CNHL   |
| lcl Glyma.09G096300_141-186   | CAVCL             | ESFRVGE               | TLIHL      | CAHR   |
| lcl Glyma.15G201800_154-199   | CAVCL             | ESFRVGE               | TLIHL      | CAHR   |
| lcl Glyma.10G259300_189-234   | CSICL             | ESFTDGD               | ELIRLP     | CGHK   |
| lcl Glyma.20G131600_187-232   | CSICL             | ESFTDGD               | ELIRLP     | CGHK   |
| lcl Glyma.17G172100_265-310   | CPICL             | EEFEEN                | LIGKLS     | CIHK   |
| lcl Glyma.17G172200_262-307   | CPICL             | EEFEEN                | LIGKLS     | CIHK   |
| lcl Glyma.03G110700_123-171   | DPLCLFPLVP        | EDQESGT               | LPFMKLS    | CFHC   |
| lcl Glyma.10G289100_82-127    | ISICL             | VEYEGED               | AVSKLGR    | CGHV   |
| lcl Glyma.20G099800_77-122    | ISICL             | VEYEGED               | AVSKLGR    | CGHV   |
| lcl Glyma.16G006200_74-120    | CVICL             | TSFEED                | SVWKLHT    | CRHI   |
| lcl Glyma.10G142800_16-53     | CLLIW             |                       | GV         | CNHA   |
| lcl Glyma.20G091400_16-53     | CLLIW             |                       | GV         | CNHA   |
| lcl Glyma.13G265400_16-53     | CLLIW             |                       | GV         | CNHA   |
| lcl Glyma.06G303600_75-104    | CTVAW             |                       | GV         | CNHA   |
| lcl Glyma.01G143600_200-252   | KNICM             | DEFYAEENEDDVKLLSSSSMP |            | CGHV   |
| lcl Glyma.17G108900_203-255   | KNICM             | DEFYAEENEDDVKLLSSSSMP |            | CGHV   |
| lcl Glyma.20G044300_97-142    | CPICL             | EELNINA               | ESYTMP     | CHHL   |
| lcl Glyma.20G044600_112-155   | DECSICL           | EGLDIN                | VYTMP      | CNHM   |
| lcl Glyma.09G257100_165-208   | PICL              | EYDVEN                | PSNLT      | CEHH   |
| lcl Glyma.18G235300_138-182   | PICL              | EYDVEN                | PSNLT      | CEHH   |
| lcl Glyma.08G016300_162-207   | CPICL             | EYDAEN                | PKLAT      | CDHH   |
| lcl Glyma.08G251300_174-216   | VPTCL             | EYTEEN                | PKIVT      | CSHH   |
| lcl Glyma.18G274000_173-215   | VPTCL             | EYTEEN                | PKIVT      | CSHH   |
| lcl Glyma.13G052000_177-221   | PTCL              | EYTKEN                | PKIMT      | CSHH   |
| lcl Glyma.19G034700_177-219   | PTCL              | EYTKEN                | PKIMT      | CSHH   |
| lcl Glyma.13G206800_34-78     | SICL              | EPFSVHD               | PSTVT      | CKHE   |
| lcl Glyma.15G005300_166-208   | TPVCL             | ERLDQDT               | GGILTTI    | CNHS   |
| lcl Glyma.01G019300_126-171   | GICMQSVRS         | GQGT                  | AIFTAE     | CSHT   |
| lcl Glyma.09G203400_19-64     | GICMQSARS         | GQGT                  | AIFTAE     | CSHT   |
| lcl Glyma.01G097900_111-159   | KICTRSVKT         | GEGK                  | AIFTAE     | CSHV   |
| lcl Glyma.08G273400_110-158   | EICMRSVKT         | GEGK                  | AIFTAE     | CSHV   |
| lcl Glyma.02G218200_86-131    | NCICNSVKT         | GQGT                  | AITYAE     | CGHA   |
| lcl Glyma.14G185600_109-152   | SGICNSVKT         | GQGT                  | AITYAE     | CGHA   |
| lcl Glyma.09G017200_92-144    | AICLDPLSYH        | SKGSSP                | GQAIFTAQ   | CSHT   |
| lcl Glyma.15G122900_92-144    | AICLDPLSYQ        | SKGSSP                | GQAIFTAQ   | CSHA   |
| lcl Glyma.07G270000_80-128    | LAICLDPLSHK       | SKGS                  | KAIFTAQ    | CSHA   |
| lcl Glyma.01G050400_262-297   |                   | MP                    | TIGVLP     | CCHA   |
| lcl Glyma.02G109200_262-297   |                   | MP                    | TIGVLP     | CCHA   |
| lcl Glyma.12G235700_273-332   | CGVCSKLLTEKSSWGTQ | KIIASNDLS             | VVSVLI     | CGHV   |
| lcl Glyma.13G201200_274-333   | CGVCSKLLTEKSSWGTQ | KIIASNDLS             | VVSVLI     | CGHV   |
| lcl Glyma.07G049700_1718-1767 | CCVNCPLTKN        | SVSS                  | GIRIFN     | CGHA   |
| lcl Glyma.16G018400_1710-1759 | CCVNCPLTKN        | SVSS                  | GIRIFN     | CGHA   |
| lcl Glyma.01G228500_290-332   | CIICREMT          |                       | TAKKLI     | CGHL   |
| lcl Glyma.11G011300_290-332   | CIICREMT          |                       | TAKKLI     | CGHL   |
| lcl Glyma.04G130500_337-383   | CAICREPMA         |                       | KAKRLN     | CNHL   |
| lcl Glyma.06G316600_337-383   | CAICREPMA         |                       | KAKRLN     | CNHL   |
| lcl Glyma.14G105900_232-269   | CAICRENVLN        |                       | DKMQELP    | CKHT   |
| lcl Glyma.17G220500_232-277   | CAICRENVLN        |                       | DKMQELP    | CKHT   |
| lcl Glyma.16G032000_12-61     | CSICYEPLN         |                       | PINEDLQSVS | CGHV   |
| lcl Glyma.03G104400_860-896   | CTACT             | FILDLPV               | HFMCMHS    |        |
| lcl Glyma.07G119500_861-897   | CTACT             | FILDLPV               | HFMCMHS    |        |
| lcl Glyma.12G116100_524-572   | CVICM             | TAIDLSPR              | SNDCMVTP   | CDHF   |
| lcl Glyma.12G205300_519-567   | CVICM             | TAIDLSPR              | SNDCMVTP   | CDHF   |
| lcl Glyma.06G290800_524-572   | CVICM             | TAIDLSPR              | SNDCMVTP   | CDHF   |
| lcl Glyma.13G295600_507-555   | CVICM             | TAIDLSPR              | SNDCMVTP   | CDHF   |
| lcl Glyma.01G195200_69-131    | CPISLEP           | M                     | QDPV       | TLCT   |
| lcl Glyma.11G046500_134-196   | CPISLEP           | M                     | QDPV       | TLCT   |
| lcl Glyma.03G202600_12-76     | LCPIISLEI         | M                     | KDPV       | TVST   |
| lcl Glyma.10G262600_10-74     | LCPIISLEI         | M                     | KDPV       | TVST   |
| lcl Glyma.19G200200_10-74     | LCPIISLDI         | M                     | KDPV       | TVST   |
| lcl Glyma.04G212300_16-53     | PIISLDL           | F                     | EDPV       | TLCT   |
| lcl Glyma.06G154100_14-76     | RCPIISLDL         | F                     | EDPV       | TLCT   |
| lcl Glyma.05G192100_12-74     | RCPIISLDL         | L                     | EDPV       | TLCT   |
| lcl Glyma.08G000400_12-74     | RCPIISLDL         | F                     | EDPV       | TLCT   |
| lcl Glyma.05G189600_16-52     | PIISLDV           | M                     | KSPV       | SLCT   |
| lcl Glyma.08G147200_16-52     | PIISLDV           | M                     | KSPV       | SLCT   |
| lcl Glyma.07G106000_30-93     | FRPIISLDL         | M                     | KDPV       | TLST   |
| lcl Glyma.15G064800_12-50     | CPISLOI           | M                     | SDPV       | ILSS   |
| lcl Glyma.16G048700_180-229   | VQPICLEYP         | M                     | CPQI       | TTC    |
| lcl Glyma.19G103000_221-270   | VQPICLEYP         | M                     | CPQI       | TSC    |
| lcl Glyma.05G237500_1120-1165 | PICDDLF           |                       | TSSAT      | VREALP |
| lcl Glyma.08G044700_1118-1163 | PICDDLF           |                       | TSSAT      | VREALP |
| lcl Glyma.07G093700_1126-1171 | PICDDLF           |                       | TSSAT      | VREALP |
| lcl Glyma.09G182600_1122-1167 | PICDDLF           |                       | TSSAT      | VREALP |
| lcl Glyma.09G115100_1126-1168 | CPICDFL           |                       | TSSS       | VREALP |
| lcl Glyma.17G096900_1156-1201 | PICHEYF           |                       | TSCSP      | VKALP  |
| lcl Glyma.14G130700_200-247   | CPVCFEYLF         |                       | ESRND      | VTVMP  |
| lcl Glyma.17G202700_200-247   | CPVCFEYLF         |                       | ESRND      | VTVMP  |
| lcl Glyma.06G074300_199-246   | CPICFEYLF         |                       | ESVND      | VTVLP  |
| lcl Glyma.06G116800_4-50      | EPVCLQSF          |                       | ERDAI      | PRVLS  |
| lcl Glyma.10G228500_5-52      | CPVCLQSF          |                       | ERDAI      | PRVLS  |
| lcl Glyma.08G241700_44-77     | CPICWESFN         |                       | IVENV      | PVYLWC |
| lcl Glyma.04G134700_4-52      | CSVCQTRYN         |                       | EEERV      | PLLLQ  |

|                               |               |       |        |      |
|-------------------------------|---------------|-------|--------|------|
| lcl Glyma.11G157400_5-54      | CSVCQTRYN     | EEERV | PLLLQ  | GH   |
| lcl Glyma.04G224200_401-445   | MAICQ         | EKMQA | PILLS  | KH   |
| lcl Glyma.06G140600_410-454   | LCAICQ        | EKMQA | PILLS  | KH   |
| lcl Glyma.18G217900_377-421   | LCAICQ        | EKMA  | PILLR  | KH   |
| lcl Glyma.08G354400_21-65     | SFVCCVCL      | DLLYK | PIVLS  | GH   |
| lcl Glyma.18G171400_21-65     | SFVCCVCL      | DLLYK | PIVLS  | GH   |
| lcl Glyma.15G237300_55-95     | CPVCL         | NAMYP | PIHQCS | NGH  |
| lcl Glyma.13G198800_100-140   | CPVCL         | NAMYP | PIHQCS | NGH  |
| lcl Glyma.04G235700_61-101    | CPVCT         | NSMYP | PIHQCH | NGH  |
| lcl Glyma.06G129000_62-102    | CPVCT         | NSMYP | PIHQCH | NGH  |
| lcl Glyma.03G257700_48-88     | CPVCT         | NSMYP | PIHQCH | NGH  |
| lcl Glyma.13G035400_631-678   | KICKMAVD      | GKVV  | KIC    | GH   |
| lcl Glyma.14G156600_631-678   | KICKMAVD      | GKVV  | KIC    | GH   |
| lcl Glyma.12G192700_673-714   | GICHEPVE      | DVVV  | TTC    | HA   |
| lcl Glyma.13G309700_670-711   | GICHEPVE      | DVVV  | TTC    | HA   |
| lcl Glyma.07G148900_159-201   | ELECGICLEINS  | KVVL  | PNCN   | HS   |
| lcl Glyma.18G200100_157-199   | EEEGICLEMNS   | MVVL  | PNCN   | HS   |
| lcl Glyma.03G060000_142-184   | EEEGICMEMNS   | KVVL  | PNCN   | HS   |
| lcl Glyma.07G195400_147-189   | EDECGICMDMNS  | KIVL  | PNCN   | HA   |
| lcl Glyma.13G180900_147-189   | EDECGICMDMNS  | KIVL  | PNCN   | HA   |
| lcl Glyma.13G240800_150-198   | EEEGICMEMNS   | KIVL  | PD     | CNHV |
| lcl Glyma.15G072700_147-189   | EEEGICMEMNS   | KIVL  | PD     | CNHV |
| lcl Glyma.18G063500_143-185   | EEEGVCLLEVKA  | KVVL  | PNCCH  | Y    |
| lcl Glyma.05G144300_156-204   | EDECGICLEPCT  | KMVL  | PNCCH  | HA   |
| lcl Glyma.08G100700_156-204   | EDECGICLEPCT  | KMVL  | PNCCH  | HA   |
| lcl Glyma.11G246100_158-206   | EDECGICLEPCT  | KMVL  | PNCCH  | HA   |
| lcl Glyma.18G011100_158-206   | EDECGICLEPCT  | KMVL  | PNCCH  | HA   |
| lcl Glyma.05G044700_154-201   | EHECGICLEST   | KMVF  | PNCCH  | HA   |
| lcl Glyma.11G246300_78-119    | EEEGICMENG    | KMVL  | PNC    | GH   |
| lcl Glyma.18G010900_145-192   | EEEGICMENG    | KMVL  | PNC    | GH   |
| lcl Glyma.02G309100_117-162   | LNCSICMQLPE   | RPVT  | TP     | CGHN |
| lcl Glyma.14G003700_117-162   | LNCSICMQLPE   | RPVT  | TP     | CGHN |
| lcl Glyma.12G001300_129-175   | SINCSICQLPE   | RPVT  | SP     | CGHS |
| lcl Glyma.05G198100_138-187   | CSICLNLWH     | DVVTV | AP     | CLHN |
| lcl Glyma.04G165900_213-256   | DFDCTLCLKLLY  | EPVT  | TP     | CGHS |
| lcl Glyma.06G196600_193-236   | DFDCTLCLKLLY  | EPVT  | TP     | CGHS |
| lcl Glyma.16G063400_170-217   | ELSCAICLEICF  | EPST  | TP     | CGHS |
| lcl Glyma.19G082000_171-218   | ELSCAICLEICF  | EPST  | TP     | CGHS |
| lcl Glyma.12G180800_764-813   | QGECPICLEVFE  | DAVL  | TP     | CAHR |
| lcl Glyma.13G320000_790-839   | QGECPICLEVFE  | DAVL  | TP     | CAHR |
| lcl Glyma.20G087900_859-904   | IIECSICMESPE  | DPVF  | TP     | CAHK |
| lcl Glyma.02G149800_290-333   | LVICLEQEY     | NAVF  | VP     | CGHM |
| lcl Glyma.10G024100_292-330   | VICLEQEY      | NAVF  | VP     | CGHM |
| lcl Glyma.03G080300_332-382   | GQLCVICLMRRR  | RSVF  | IP     | CGHL |
| lcl Glyma.16G008300_327-377   | GQLCVICLMRRR  | RSVF  | IP     | CGHL |
| lcl Glyma.18G149800_331-381   | GQLCVICLMRRR  | RSVF  | IP     | CGHL |
| lcl Glyma.04G043900_344-393   | EKLCICYDEQR   | NSFF  | VP     | CGHC |
| lcl Glyma.06G044100_357-407   | EKLCICYDEQR   | NSFF  | VP     | CGHC |
| lcl Glyma.07G150500_385-433   | HLCAICFDAPR   | DCFF  | LP     | CGHC |
| lcl Glyma.18G201500_386-434   | RLCAICFDAPR   | DCFF  | LP     | CGHC |
| lcl Glyma.10G181100_405-450   | VICLDAPA      | EGAC  | TP     | CGHV |
| lcl Glyma.20G209400_406-451   | VICLDAPA      | EGAC  | TP     | CGHV |
| lcl Glyma.03G180500_289-337   | QGKVICLSEPR   | DTIV  | LP     | CRHM |
| lcl Glyma.19G181100_312-356   | VICWSEPR      | DTIV  | HP     | CRHM |
| lcl Glyma.10G052000_291-337   | EVICLSEPR     | DTIV  | LP     | CRHM |
| lcl Glyma.13G139400_291-337   | EVICLSEPR     | DTIV  | LP     | CRHM |
| lcl Glyma.13G326700_239-283   | VICLSEPP      | DTIV  | LP     | CRHM |
| lcl Glyma.07G257200_279-325   | EVICMTEPK     | DNAV  | LP     | CRHM |
| lcl Glyma.17G016900_219-265   | EVICMTEPK     | DNAV  | LT     | CRHM |
| lcl Glyma.13G208500_314-360   | EVICMTEPK     | DNAV  | LP     | CRHM |
| lcl Glyma.15G104300_316-362   | EVICMTEPK     | DNAV  | LP     | CRHM |
| lcl Glyma.09G048200_866-915   | KGNCCICYEMKV  | DSVL  | YR     | CGHM |
| lcl Glyma.15G155500_861-910   | KGNCCICYEMKV  | DSVL  | YR     | CGHM |
| lcl Glyma.10G198600_793-842   | KGTCCVCDNHI   | DSLL  | YR     | CGHM |
| lcl Glyma.20G191400_792-841   | KGTCCVCDNHI   | DSLL  | YR     | CGHM |
| lcl Glyma.11G191900_808-850   | CICESNI       | DSLL  | YR     | CGHL |
| lcl Glyma.12G082400_798-847   | KGLCCICESNI   | DSLL  | YR     | CGHL |
| lcl Glyma.12G179300_740-789   | KGLCCICESNI   | NSLL  | YR     | CGHM |
| lcl Glyma.13G321300_793-842   | KGLCCICESNI   | DSLL  | YR     | CGHM |
| lcl Glyma.13G212200_825-875   | ERECVMCLSEEM  | SVVF  | LP     | CAHQ |
| lcl Glyma.15G100500_827-877   | ERECVMCLSAEM  | SVVF  | LP     | CAHQ |
| lcl Glyma.17G020500_819-869   | ERECVMCLSEEM  | SVVF  | LP     | CAHQ |
| lcl Glyma.07G253800_821-871   | EQECVMCLSEEM  | SVLF  | MP     | CAHQ |
| lcl Glyma.02G150400_776-826   | EQECVMCLSEEM  | SVVF  | LP     | CAHQ |
| lcl Glyma.05G112600_659-709   | NRECIIVCMKDEV | SIVF  | LP     | CAHQ |
| lcl Glyma.17G154400_621-671   | NRECIIVCMKDEV | SIVF  | LP     | CAHQ |
| lcl Glyma.11G042600_620-669   | RECIICGKDEP   | SVIF  | LP     | CAHQ |
| lcl Glyma.04G009100_1020-1065 | SHVCKVCFESPT  | AAIL  | LP     | CRHF |
| lcl Glyma.06G009000_1020-1065 | SHVCKVCFESPT  | AAIL  | LP     | CRHF |
| lcl Glyma.16G098500_18-63     | SHVCKVCFESPT  | TAIM  | LP     | CRHF |
| lcl Glyma.07G159000_32-77     | SHVCKVCFESPT  | TVIL  | LS     | CRHF |
| lcl Glyma.11G112700_1028-1064 | KVCFQSST      | AAIL  | LP     | CRHF |
| lcl Glyma.12G038600_1038-1083 | SHVCKVCFESST  | AAIL  | LP     | CRHF |
| lcl Glyma.05G013200_415-460   | KVLCRICEFGEI  | NVVL  | LP     | CRHR |
| lcl Glyma.17G121200_415-460   | KVLCRICEFGEI  | NVVL  | LP     | CRHR |
| lcl Glyma.10G204900_433-478   | KILCRICEFEEQI | NVVL  | LP     | CRHH |
| lcl Glyma.20G185600_422-467   | KILCRICEFEEQI | NVVL  | LP     | CRHH |
| lcl Glyma.01G029500_286-325   | NLTCRACKTKTV  | SMLL  | MP     | CRHL |
| lcl Glyma.02G035800_286-325   | NLTCRACKVKTV  | SMLL  | MP     | CRHL |
| lcl Glyma.14G083900_301-342   | MMTCKACRVNEV  | TMVL  | LP     | CKHL |
| lcl Glyma.17G241100_292-333   | MMTCKACRVNEV  | TMVL  | LP     | CKHL |
| lcl Glyma.08G170400_204-247   | MCRNCGKEES    | CVLI  | LP     | CRHL |
| lcl Glyma.15G256500_288-331   | LRCNCRKEES    | CVLI  | LP     | CRHL |
| lcl Glyma.09G019900_261-297   | LKNCGLRES     | VVLL  | LP     | CRHL |
| lcl Glyma.15G126400_264-300   | LKNCGVRES     | VVLL  | LP     | CRHL |
| lcl Glyma.01G203300_274-316   | CRGCAKRVA     | SVVV  | LP     | CRHL |
| lcl Glyma.11G039700_281-323   | CRGCAKRVA     | SVVV  | LP     | CRHL |
| lcl Glyma.05G068400_302-344   | CRGCAKRVA     | SVVV  | LP     | CRHL |
| lcl Glyma.17G150900_309-344   | CRGCAKRVA     | SVVV  | LP     | CRHL |
| lcl Glyma.09G282200_4713-4753 | CRVLSSEV      | DITI  | VP     | CGHV |
| lcl Glyma.20G003400_4712-4751 | RVLSSEV       | DITI  | VP     | CGHV |
| lcl Glyma.04G220000_1217-1265 | DGLCICYACEA   | NAOI  | AP     | CSHR |
| lcl Glyma.06G145900_1217-1265 | DSLCCICYACEA  | DAOI  | AP     | CSHR |

|                               |            |             |                |             |      |
|-------------------------------|------------|-------------|----------------|-------------|------|
| lc1 Glyma.08G358300_319-375   | .....MEL   | CICFDQAC    | .....TIEV      | .....RP     | CGHQ |
| lc1 Glyma.18G176600_318-374   | .....MEL   | CICFDQAC    | .....TIEV      | .....RP     | CGHQ |
| lc1 Glyma.12G063600_316-372   | .....TEL   | CICFEQVC    | .....TIEV      | .....QD     | CGHQ |
| lc1 Glyma.11G140000_316-372   | .....TEL   | CICFEQVC    | .....TIEV      | .....QD     | CGHQ |
| lc1 Glyma.13G335300_323-381   | .....SEL   | CICFEQVC    | .....TIEV      | .....QN     | CGHQ |
| lc1 Glyma.15G039100_316-374   | .....SEL   | CICFEQVC    | .....TIEV      | .....QN     | CGHQ |
| lc1 Glyma.08G315500_281-340   | .....KEL   | SIICYDRVC   | .....TFVV      | .....RP     | CGHE |
| lc1 Glyma.03G079200_225-269   | .....      | CVCMVRHK    | .....GAAF      | .....IP     | CGHT |
| lc1 Glyma.16G094800_214-258   | .....      | CVCMVRHK    | .....GAAF      | .....IP     | CGHT |
| lc1 Glyma.08G350900_306-345   | .....      | CVCMVRHK    | .....AAAF      | .....IP     | CGHT |
| lc1 Glyma.18G165000_306-353   | .....HT    | CVCMVKHK    | .....AAAF      | .....IP     | CGHT |
| lc1 Glyma.07G264100_155-203   | .....DWV   | CVCMGRKK    | .....GAAF      | .....IP     | CGHT |
| lc1 Glyma.17G009900_146-194   | .....DWV   | CVCMGRKK    | .....GAAF      | .....IP     | CGHT |
| lc1 Glyma.09G008200_144-192   | .....DSV   | CVCMGRKK    | .....GAAF      | .....IP     | CGHT |
| lc1 Glyma.15G112600_157-205   | .....DSV   | CVCMGRKK    | .....GAAL      | .....IP     | CGHT |
| lc1 Glyma.04G189900_380-423   | .....NQV   | PICLTDP     | .....KDMA      | .....FC     | CGHQ |
| lc1 Glyma.06G175700_381-424   | .....NQV   | PICLTDP     | .....KDMA      | .....FC     | CGHQ |
| lc1 Glyma.05G173500_413-456   | .....SKV   | PICLTND     | .....KDMA      | .....FC     | CGHQ |
| lc1 Glyma.08G130800_413-456   | .....NKV   | PICLTNG     | .....KDMA      | .....FC     | CGHQ |
| lc1 Glyma.11G244000_416-459   | .....NKV   | PICLTNA     | .....KDMA      | .....FC     | CGHQ |
| lc1 Glyma.18G013100_412-455   | .....NKV   | PICLTNA     | .....KDMA      | .....FC     | CGHQ |
| lc1 Glyma.05G115700_444-487   | .....NQL   | PICLTNS     | .....KDMA      | .....FC     | CGHQ |
| lc1 Glyma.19G051500_449-492   | .....NQL   | PICLTNS     | .....KDMA      | .....FC     | CGHQ |
| lc1 Glyma.19G078600_381-424   | .....NQL   | PICLNSA     | .....KDMA      | .....FC     | CGHQ |
| lc1 Glyma.19G124300_227-270   | .....NQL   | PICLNSA     | .....KDMA      | .....FC     | CGHQ |
| lc1 Glyma.16G068400_384-427   | .....NQL   | PICLNSA     | .....KDMA      | .....FC     | CGHQ |
| lc1 Glyma.04G211000_388-427   | .....      | PICLTNP     | .....KDMA      | .....FC     | CGHT |
| lc1 Glyma.05G193500_382-421   | .....      | PICLTNP     | .....KDMA      | .....FC     | CGHT |
| lc1 Glyma.08G234200_376-419   | .....QMA   | AICLTNK     | .....KDLA      | .....FC     | CGHM |
| lc1 Glyma.15G219300_368-411   | .....QMA   | AICLTNK     | .....KDLA      | .....FC     | CGHM |
| lc1 Glyma.10G238000_315-375   | .....IDF   | AVCLERP     | .....SVAA      | .....EG     | CGHE |
| lc1 Glyma.20G156600_315-375   | .....IDF   | AVCLERP     | .....SVAA      | .....EG     | CGHE |
| lc1 Glyma.09G143600_314-374   | .....VDA   | AVCLERP     | .....SVAA      | .....EG     | CGHE |
| lc1 Glyma.01G178600_28-77     | .....FE    | NICFDLAQ    | .....DPVI      | .....TL     | CGHL |
| lc1 Glyma.11G063500_28-77     | .....FE    | NICFDLAQ    | .....DPVI      | .....TL     | CGHL |
| lc1 Glyma.04G034500_31-78     | .....      | NICFELAQ    | .....DPII      | .....TL     | CGHL |
| lc1 Glyma.06G034500_29-78     | .....FE    | NICFELAQ    | .....DPII      | .....TL     | CGHL |
| lc1 Glyma.03G145700_157-202   | .....      | NICLDLAR    | .....DPVV      | .....TC     | CGHL |
| lc1 Glyma.19G148900_156-201   | .....      | NICLDLAR    | .....DPVV      | .....TC     | CGHL |
| lc1 Glyma.08G157200_105-149   | .....      | NVCLDRAR    | .....DPVL      | .....TC     | CGHL |
| lc1 Glyma.15G269000_105-151   | .....      | NICLDKAR    | .....DPVL      | .....TC     | CGHL |
| lc1 Glyma.09G001100_123-170   | .....      | NICLDRAR    | .....DPVL      | .....AC     | CGHL |
| lc1 Glyma.12G240800_129-176   | .....      | NICLDRAR    | .....DPVL      | .....TC     | CGHL |
| lc1 Glyma.06G293400_33-91     | .....FD    | NICLECVQ    | .....DPVV      | .....TL     | CGHL |
| lc1 Glyma.12G112000_36-91     | .....      | NICLECVQ    | .....DPVV      | .....TL     | CGHL |
| lc1 Glyma.12G203900_46-99     | .....      | NICLECVQ    | .....DPVV      | .....TL     | CGHL |
| lc1 Glyma.13G297700_44-94     | .....D     | NICLECVQ    | .....DPVV      | .....TL     | CGHL |
| lc1 Glyma.12G151200_37-90     | .....      | NICMESAH    | .....DPVV      | .....TL     | CGHL |
| lc1 Glyma.07G196000_33-84     | .....      | NICLDFAH    | .....EPVV      | .....TL     | CGHL |
| lc1 Glyma.13G179900_30-81     | .....      | NICLDFAH    | .....EPVV      | .....TL     | CGHL |
| lc1 Glyma.13G239500_29-80     | .....      | NICLDFAH    | .....EPVV      | .....TL     | CGHL |
| lc1 Glyma.15G073700_29-80     | .....      | NICLDFAH    | .....EPVV      | .....TL     | CGHL |
| lc1 Glyma.14G099100_339-384   | .....      | CTLCLSNRQ   | .....HPTA      | .....TS     | CGHV |
| lc1 Glyma.17G225600_339-384   | .....      | CTLCLSNRQ   | .....HPTA      | .....TS     | CGHV |
| lc1 Glyma.01G074000_824-869   | .....I     | KSICQDRA    | .....KEVVI     | .....TK     | CYHL |
| lc1 Glyma.11G175700_818-875   | .....EYRDI | KSICQDRA    | .....KEVVI     | .....TK     | CYHL |
| lc1 Glyma.02G267300_828-871   | .....      | TVCTDRP     | .....KEVVI     | .....VK     | CYHL |
| lc1 Glyma.14G050200_828-871   | .....      | TVCTDRP     | .....KEVVI     | .....VK     | CYHL |
| lc1 Glyma.10G288200_718-762   | .....      | LVCNDPP     | .....EEPVI     | .....TM     | CGHV |
| lc1 Glyma.20G100800_721-765   | .....      | LVCNDPP     | .....EEPVI     | .....TM     | CGHV |
| lc1 Glyma.04G125600_69-110    | .....      | TVCQALLF    | .....DTSKC     | .....VP     | CSHV |
| lc1 Glyma.06G313000_69-110    | .....      | TVCQALLF    | .....DTSKC     | .....VP     | CSHV |
| lc1 Glyma.10G155500_28-80     | .....      | PICLGPFL    | .....QLSYL     | .....DK     | CFHK |
| lc1 Glyma.20G232800_26-78     | .....      | PICLGPFL    | .....QLSYL     | .....DK     | CFHK |
| lc1 Glyma.04G255000_11-57     | .....      | SVCHGNF     | .....HPCQ      | .....AN     | CSHW |
| lc1 Glyma.11G103800_150-191   | .....      | PICMGPMV    | .....HE        | .....MSTR   | CGHI |
| lc1 Glyma.12G028700_150-191   | .....      | PICMGPMV    | .....HE        | .....MSTR   | CGHI |
| lc1 Glyma.09G281300_151-194   | .....      | PICMSPLV    | .....EE        | .....MSTR   | CGHI |
| lc1 Glyma.20G004500_80-121    | .....      | PICMSALE    | .....EE        | .....TSTR   | CAHI |
| lc1 Glyma.03G124900_577-621   | .....DFD   | PIICLSPP    | .....EI        | .....VITR   | CAHI |
| lc1 Glyma.03G214100_219-270   | .....      | SIICLTVF    | .....DP        | .....VSLT   | CGHI |
| lc1 Glyma.19G210900_219-269   | .....      | SIICLTVF    | .....DP        | .....VSLT   | CGHI |
| lc1 Glyma.10G018800_210-261   | .....      | SIICLTVF    | .....DS        | .....VSLT   | CGHI |
| lc1 Glyma.19G203000_218-270   | .....      | CAICLDFVF   | .....NP        | .....YALS   | CGHI |
| lc1 Glyma.08G153800_209-269   | .....      | SVCLEHLV    | .....SKPTAAECK | .....FGLLSE | CDHP |
| lc1 Glyma.15G272400_209-269   | .....      | SVCLEHLV    | .....SKPTAAECK | .....FGLLSE | CDHP |
| lc1 Glyma.08G154100_188-251   | .....      | NVCLERVL    | .....SKPKPADCK | .....FGLLPE | CDHA |
| lc1 Glyma.15G273000_188-250   | .....      | NVCLERVL    | .....SKPKPADCK | .....FGLLPE | CDHA |
| lc1 Glyma.10G151500_34-80     | .....      | SICLEVVA    | .....DN..GDRS  | .....WSKL   | CGHQ |
| lc1 Glyma.20G236700_42-88     | .....      | SICLEVVA    | .....DN..GDRS  | .....WSKL   | CGHQ |
| lc1 Glyma.19G232800_18-67     | .....VC    | SIICLEAVT   | .....DN..GDRS  | .....WAKL   | CGHQ |
| lc1 Glyma.02G219200_1354-1408 | .....DET   | PIICQKLG    | .....KQK       | .....MVFG   | CGHV |
| lc1 Glyma.14G186500_414-466   | .....      | PIICQKLG    | .....KQK       | .....MVFG   | CGHV |
| lc1 Glyma.06G290400_82-126    | .....      | PIICLGIIK   | .....KTR       | .....TVME   | CLHR |
| lc1 Glyma.12G116500_60-104    | .....      | PIICLGIIK   | .....KTR       | .....TVME   | CLHR |
| lc1 Glyma.12G205500_121-165   | .....      | PIICLGIIK   | .....KTR       | .....TVME   | CLHR |
| lc1 Glyma.13G295300_124-168   | .....      | PIICLGIIK   | .....KTR       | .....TVME   | CLHR |
| lc1 Glyma.08G350700_40-90     | .....DDIRK | DVEPIICLGII | .....NTR       | .....VME    | CMHR |
| lc1 Glyma.13G177200_138-181   | .....      | PIICGLIR    | .....KTK       | .....AVME   | CMHR |
| lc1 Glyma.02G267800_40-81     | .....DFL   | PIICMQUIK   | .....DP        | .....FLTA   | CGHS |
| lc1 Glyma.14G049700_46-87     | .....DFL   | PIICMQUIK   | .....DA        | .....FLTA   | CGHS |
| lc1 Glyma.02G141500_20-65     | .....      | PLCKKFLK    | .....E         | .....ATAISL | CLH  |
| lc1 Glyma.10G032500_19-64     | .....      | PLCNKFLK    | .....E         | .....ATAISL | CLH  |
| lc1 Glyma.03G159500_34-79     | .....      | PLCNKFLR    | .....E         | .....ATTISE | CLH  |
| lc1 Glyma.19G161700_18-63     | .....      | PLCGKFLR    | .....E         | .....ATTISE | CLH  |
| lc1 Glyma.10G162800_19-64     | .....      | PLCHNFFK    | .....D         | .....ATTIST | CLH  |
| lc1 Glyma.20G225400_20-65     | .....      | PLCHKFFK    | .....D         | .....ATTISL | CLH  |
| lc1 Glyma.10G180300_32-77     | .....      | PLCNKFFR    | .....N         | .....ATTISE | CCH  |
| lc1 Glyma.03G165600_25-74     | .....K     | PLCLSLFK    | .....R         | .....PVL    | CLNH |
| lc1 Glyma.19G166900_24-66     | .....LK    | PLCLSLFK    | .....R         | .....PVL    | CLNH |
| lc1 Glyma.13G220400_468-515   | .....LK    | PIICWSLLD   | .....S         | .....AVSLT  | CLNH |
| lc1 Glyma.15G092000_450-498   | .....ELI   | PIICWSLLD   | .....S         | .....AVSLT  | CLNH |
| lc1 Glyma.09G099300_2-43      | .....      | CNACWREVE   | .....G         | .....RAIST  | TCGH |



lcl|Glyma.15G209600\_2-43 . . . . . CNA CWREVE . . . . . G . . . . . RAIST TCGH  
lcl|Glyma.10G149400\_424-470 . . . . . GICLSEED . . . . . KRRV . . . . . RGVLCN COTH  
lcl|Glyma.20G238800\_406-452 . . . . . GICLSEED . . . . . KRRV . . . . . RGVLCN COTH  
lcl|Glyma.17G082300\_27-72 . . . . . GICYAESG . . . . . VSI . . . . . AGEID CESH  
lcl|Glyma.19G042100\_335-385 . . . . . MSVICLTFES . . . . . ST . . . . . RGLPL CEH  
lcl|Glyma.09G206500\_285-320 . . . . . DNICFSEYA . . . . . GS . . . . . QFIRLPCGH  
lcl|Glyma.02G103300\_678-724 . . . . . LEPVICQEEFS . . . . . DGEN . . . . . VGSLD CGHE  
lcl|Glyma.07G214600\_664-710 . . . . . LEPVICQDEFA . . . . . DGEN . . . . . VGSLD CGHE  
lcl|Glyma.04G039700\_603-649 . . . . . AEPCCVCQEDYG . . . . . DGND . . . . . IGTLD CGHD  
lcl|Glyma.04G039800\_683-729 . . . . . AEPCCVCQEDYG . . . . . DGND . . . . . IGTLD CGHD  
lcl|Glyma.06G041000\_657-703 . . . . . AEPCCVCQEDYG . . . . . DEDD . . . . . IGTLD CGHD  
lcl|Glyma.05G241900\_382-427 . . . . . CSICQEEYE . . . . . AGDE . . . . . LGRLN CEHS  
lcl|Glyma.08G049400\_328-373 . . . . . CSICQEEYE . . . . . AGNE . . . . . LGRLN CEHI  
lcl|Glyma.07G097700\_305-350 . . . . . SVCCQEEYE . . . . . SDDE . . . . . LGRLK CDHS  
lcl|Glyma.09G180300\_320-365 . . . . . SVCCQEEYE . . . . . SDDE . . . . . LGRLK CDHS  
lcl|Glyma.14G134600\_501-543 . . . . . CICCQEEYV . . . . . VGDE . . . . . VGDLO CEHR  
lcl|Glyma.17G198300\_478-520 . . . . . CICCQEEYV . . . . . VGDE . . . . . VGDLO CEHR  
lcl|Glyma.06G076600\_488-533 . . . . . CSICQEEYV . . . . . AAE . . . . . VGSLD CEHM  
lcl|Glyma.03G179300\_494-542 . . . . . EGNVICLEEYK . . . . . NMDD . . . . . VGTLKT CGHD  
lcl|Glyma.19G180000\_492-540 . . . . . EGNVICLEEYK . . . . . NMDD . . . . . VGTLKT CGHD  
lcl|Glyma.10G051200\_482-530 . . . . . EEAICILEEYK . . . . . NMDD . . . . . VGTLKA CGHD  
lcl|Glyma.13G138700\_493-541 . . . . . EETCAICILEEYK . . . . . NMDD . . . . . VGTLKA CGHD  
lcl|Glyma.06G229700\_316-362 . . . . . TDLICIQDEYK . . . . . NKEN . . . . . IGLR CGHE  
lcl|Glyma.06G234500\_258-302 . . . . . LCIICQDEYK . . . . . NKEN . . . . . IGLR CGHE  
lcl|Glyma.11G156300\_288-334 . . . . . TDLICIQDEYK . . . . . NQEK . . . . . IGLR CGHE  
lcl|Glyma.06G234300\_402-449 . . . . . TDSICIQDEYK . . . . . NQEK . . . . . IGLR CGHE  
lcl|Glyma.12G158500\_402-449 . . . . . NDSICIQDEYK . . . . . SQEK . . . . . IGLR CGHE  
lcl|Glyma.13G272700\_474-517 . . . . . IICQDEFK . . . . . NQEK . . . . . IGLV CEHE  
lcl|Glyma.04G249100\_149-193 . . . . . VICQVEYE . . . . . EGEA . . . . . LVALQ CEHP  
lcl|Glyma.06G113900\_130-174 . . . . . VICQVEYE . . . . . EGEA . . . . . LVALQ CEHP  
lcl|Glyma.13G031100\_152-196 . . . . . VICQVEYE . . . . . EGEP . . . . . LVAIQ CEHP  
lcl|Glyma.14G152800\_154-198 . . . . . VICQVEYE . . . . . EGES . . . . . LVAIQ CEHP  
lcl|Glyma.10G284900\_291-328 . . . . . SVICRVDE . . . . . DGES . . . . . LTVLS CKHL  
lcl|Glyma.20G104300\_280-331 . . . . . NDSVICRVDE . . . . . DDES . . . . . LTVLS CKHL  
lcl|Glyma.11G132700\_192-240 . . . . . DERVICQMEYR . . . . . RGDK . . . . . RITLP CKHV  
lcl|Glyma.12G057100\_192-240 . . . . . DERVICQMEYR . . . . . RGDK . . . . . RITLP CKHV  
lcl|Glyma.12G237700\_196-240 . . . . . VICQMTYR . . . . . RGDQ . . . . . QMKLP CSHV  
lcl|Glyma.13G203300\_196-240 . . . . . VICQMTYR . . . . . RGDQ . . . . . QMKLP CSHV  
lcl|Glyma.03G184600\_122-174 . . . . . GLLCPICMDAWN . . . . . NGEHH . . . . . ICCLP CGHI  
lcl|Glyma.14G147100\_225-268 . . . . . PICMDEFKV . . . . . GGDK . . . . . ACQLP CHT  
lcl|Glyma.01G219800\_243-291 . . . . . CEQCKS.GLHG . . . . . EMLLCCDR . . . . . CDKG  
lcl|Glyma.11G023700\_243-291 . . . . . CEQCKS.GLHG . . . . . EMLLCCDR . . . . . CDKG  
lcl|Glyma.13G170000\_1273-1321 . . . . . CKVCGI.DRDD . . . . . DSVLLCDT . . . . . CDAE  
lcl|Glyma.19G010200\_1251-1297 . . . . . CKVCGI.DRDD . . . . . DSVLLCDT . . . . . CDAE  
lcl|Glyma.02G013500\_1244-1297 . . . . . CKVCGS.RDRG . . . . . DVMLICGDESGSV . . . . . CGIG  
lcl|Glyma.10G014100\_1243-1296 . . . . . CKVCGS.RDRG . . . . . DVMLICGDESGSV . . . . . CGIG  
lcl|Glyma.02G295400\_391-439 . . . . . QMCEL.SVNEV . . . . . DTVLLCDA . . . . . CEKG  
lcl|Glyma.14G018000\_392-439 . . . . . QMCEL.SVNEV . . . . . DTVLLCDA . . . . . CEKG  
lcl|Glyma.09G059700\_234-289 . . . . . CANCKLHEAFP . . . . . NDIIICDG . . . . . TKNRA  
lcl|Glyma.15G166200\_251-303 . . . . . CANCKLHEAFP . . . . . NDIIICDG . . . . . TKNRA  
lcl|Glyma.17G059400\_224-279 . . . . . CVKCTVREELPD . . . . . NDIIICDG . . . . . TKNRA  
lcl|Glyma.10G260400\_343-398 . . . . . CAKQSKELSTN . . . . . NDIIICDG . . . . . VCDRG  
lcl|Glyma.20G130800\_344-399 . . . . . CAKQSKELSTN . . . . . NDIIICDG . . . . . VCDRG  
lcl|Glyma.01G234300\_253-300 . . . . . DICGD . . . . . DLAICS . . . . . RSDG  
lcl|Glyma.11G008600\_251-297 . . . . . DICGD . . . . . DLAICS . . . . . RSDG  
lcl|Glyma.12G014900\_273-322 . . . . . DICGD . . . . . DLAICS . . . . . RSDG  
lcl|Glyma.11G109800\_273-322 . . . . . DICGD . . . . . DLAICS . . . . . RSDG  
lcl|Glyma.17G155700\_20-68 . . . . . DICGD . . . . . QGFE . . . . . EYLAICN . . . . . KCPDG  
lcl|Glyma.04G163100\_13-61 . . . . . DICGA . . . . . SGFD . . . . . ETIVTCS . . . . . KKNIN  
lcl|Glyma.11G043500\_25-80 . . . . . DTCGA . . . . . SGFD . . . . . NELVVCH . . . . . KNEG  
lcl|Glyma.06G230000\_305-354 . . . . . CLQCGN . . . . . AGFP . . . . . ETLVFCN . . . . . KQVY  
lcl|Glyma.09G125400\_373-422 . . . . . CLQCGN . . . . . AGFP . . . . . ETLVFCN . . . . . KQVY  
lcl|Glyma.10G227100\_4-50 . . . . . CLHCGD . . . . . RGFP . . . . . ETLVFCN . . . . . EKAY  
lcl|Glyma.20G165200\_4-53 . . . . . CLHCGD . . . . . RGFP . . . . . ETLVFCN . . . . . EKAY  
lcl|Glyma.04G214800\_25-74 . . . . . CLICGD . . . . . KGD . . . . . KSLIYCD . . . . . CKAC  
lcl|Glyma.04G062400\_53-97 . . . . . CQA . . . . . CGEN . . . . . ENLVSCG . . . . . TCTYA  
lcl|Glyma.06G063400\_53-97 . . . . . CQA . . . . . CGEN . . . . . ENLVSCG . . . . . TCTYA  
lcl|Glyma.12G170900\_115-166 . . . . . LCGN . . . . . VFDT . . . . . EPLVKCEDT . . . . . KCHVS  
lcl|Glyma.13G328100\_115-166 . . . . . LCGN . . . . . VFDT . . . . . EPLVKCEDT . . . . . KCHVS  
lcl|Glyma.12G071300\_116-167 . . . . . LCGS . . . . . RLET . . . . . ENLVKCDDA . . . . . RCHVW  
lcl|Glyma.04G253800\_296-345 . . . . . CHYGRGDTGRDS . . . . . NRLIVCAS . . . . . CKVA  
lcl|Glyma.06G108500\_295-345 . . . . . CHYGRGDTSRDS . . . . . NRLIVCAS . . . . . CKVV  
lcl|Glyma.15G219200\_660-708 . . . . . CEICT . . . . . TEER . . . . . KLLQCS . . . . . CGKL  
lcl|Glyma.01G238300\_516-558 . . . . . GICGD . . . . . GG . . . . . DLICCD . . . . . G . . . . . CPST  
lcl|Glyma.11G005500\_722-764 . . . . . GICGD . . . . . GG . . . . . DLICCD . . . . . G . . . . . CPST  
lcl|Glyma.01G238200\_728-770 . . . . . GICGD . . . . . GG . . . . . DLICCD . . . . . G . . . . . CPST  
lcl|Glyma.11G005300\_720-760 . . . . . GICGD . . . . . GG . . . . . DLICCD . . . . . G . . . . . CPST  
lcl|Glyma.02G146500\_568-610 . . . . . GVCGD . . . . . GG . . . . . DLICCD . . . . . G . . . . . CPST  
lcl|Glyma.03G155500\_313-355 . . . . . SLCGK . . . . . RG . . . . . DLICCD . . . . . T . . . . . CPST  
lcl|Glyma.10G044200\_547-587 . . . . . AVCGD . . . . . GG . . . . . DLILCN . . . . . G . . . . . CPRA  
lcl|Glyma.13G131800\_545-585 . . . . . AVCGD . . . . . GG . . . . . DLILCN . . . . . G . . . . . CPRA  
lcl|Glyma.06G046500\_300-343 . . . . . CAICYF . . . . . GG . . . . . ELVLCD . . . . . R . . . . . CPSS  
lcl|Glyma.11G170900\_521-564 . . . . . SVCHY . . . . . GG . . . . . ELILCD . . . . . K . . . . . CPSS  
lcl|Glyma.03G181800\_43-91 . . . . . VSNQVR . . . . . GG . . . . . VLLSCSGK . . . . . G . . . . . CQR  
lcl|Glyma.11G074400\_81-126 . . . . . CFICFD . . . . . GG . . . . . SLVLCDRR . . . . . G . . . . . CKKA  
lcl|Glyma.13G320100\_386-430 . . . . . RLQGM . . . . . DG . . . . . TLLCCD . . . . . G . . . . . CPAV  
lcl|Glyma.02G296200\_232-286 . . . . . CALCDN . . . . . GGNT . . . . . CCDGVCMSRFHAT . . . . . VEAG  
lcl|Glyma.18G086000\_229-283 . . . . . CAICDN . . . . . GGQLL . . . . . CCDGKCMRSFHAN . . . . . EEDG  
lcl|Glyma.13G197800\_36-86 . . . . . CIHONN . . . . . KGEA . . . . . KEDGLLCSGRG . . . . . CPVA  
lcl|Glyma.15G236400\_75-123 . . . . . CIHONN . . . . . KGEA . . . . . EGVLICGGRG . . . . . CPVA  
lcl|Glyma.13G057300\_662-708 . . . . . CVCLGG . . . . . R . . . . . VENLFIC . . . . . HG . . . . . CQR  
lcl|Glyma.19G029100\_661-707 . . . . . CVCLGG . . . . . R . . . . . VENLFIC . . . . . HG . . . . . CQR  
lcl|Glyma.02G227900\_820-872 . . . . . GICGQ . . . . . TKIEG . . . . . TEDGD . . . . . LLACI . . . . . Q . . . . . CEHK  
lcl|Glyma.14G194800\_734-787 . . . . . GICRQ . . . . . TKIEG . . . . . TEDGD . . . . . LLACI . . . . . Q . . . . . CEHK  
lcl|Glyma.11G171200\_781-832 . . . . . GICGQ . . . . . RKIDG . . . . . DEVGQ . . . . . LLPCI . . . . . Q . . . . . CEHK  
lcl|Glyma.10G062700\_503-554 . . . . . VLCRS . . . . . SDFSR . . . . . SGFGPRTIICD . . . . . Q . . . . . CEKE  
lcl|Glyma.13G147100\_501-557 . . . . . VLCRS . . . . . SDFSR . . . . . SGFGPRTIICD . . . . . Q . . . . . CEKE  
lcl|Glyma.02G058300\_166-214 . . . . . GSGGGNYNKDE . . . . . FWIGCDI . . . . . CEWW  
lcl|Glyma.06G319800\_166-214 . . . . . GSGGGNYNKDE . . . . . FWIGCDI . . . . . CEWW  
lcl|Glyma.07G271400\_198-247 . . . . . GAGDNYGTDE . . . . . FWICCDM . . . . . CERW  
lcl|Glyma.17G002600\_199-248 . . . . . GAGDNYGTDE . . . . . FWICCDM . . . . . CERW  
lcl|Glyma.11G190000\_1281-1329 . . . . . CHLRKPYMSDL . . . . . TYICCT . . . . . CQNW  
lcl|Glyma.12G084300\_1287-1335 . . . . . CHLRKPYMSDL . . . . . TYICCT . . . . . CRNW





Human\_c-Cbl

β8

α14

▶ 00...0000...0.0  
20 30

T...TT

Human\_c-Cbl

consensus

|                               |           |              |          |        |          |
|-------------------------------|-----------|--------------|----------|--------|----------|
| lcl Glyma.09G103000_21-70     | MCTS      | CLTSW        | Q.ESEGGQ | CP     | FC       |
| lcl Glyma.15G275000_20-69     | TFCRS     | CI RKWL      | ESG      | NNT    | IC       |
| lcl Glyma.04G067900_40-89     | VCRA      | CYEYERKD     |          | GNQS   | QCKTRY   |
| lcl Glyma.06G069600_30-98     | VCRA      | CYEYERKD     |          | GNQS   | QCKTRY   |
| lcl Glyma.13G202500_20-69     | VCRP      | CYEYERKD     |          | GNQS   | QCKTRY   |
| lcl Glyma.02G080900_38-87     | VCRP      | CYEYERKD     |          | GNQS   | QCKTRY   |
| lcl Glyma.16G165900_30-96     | VCRP      | CYEYERRE     |          | GNQV   | QCKTRY   |
| lcl Glyma.05G187300_39-88     | VCRP      | CYEYERRE     |          | GNQV   | QCKTRY   |
| lcl Glyma.08G145600_39-88     | VCRP      | CYEYERRE     |          | GNQA   | QCKTRY   |
| lcl Glyma.10G223500_41-90     | VCRP      | CYEYERRE     |          | GNKI   | QCKTRY   |
| lcl Glyma.02G205800_37-86     | ACRP      | CYEYERRE     |          | GRQV   | QCKTRY   |
| lcl Glyma.17G072200_27-95     | ACRP      | CYEYERRE     |          | GRQV   | QCKTRY   |
| lcl Glyma.04G153700_37-86     | VCRP      | CYEYERRE     |          | GSOL   | QCKTRY   |
| lcl Glyma.06G225500_37-86     | VCRP      | CYEYERRE     |          | GSHL   | QCKTRY   |
| lcl Glyma.04G142700_37-86     | VCRP      | CYEYERRE     |          | GTQV   | QCKTRY   |
| lcl Glyma.06G225400_46-117    | VCRP      | CYEYERRE     |          | GTQV   | QCKTRY   |
| lcl Glyma.06G316800_40-89     | VCKS      | CYEYERRE     |          | GNQV   | QCKTRF   |
| lcl Glyma.09G051100_38-87     | VCRP      | CYEYERSE     |          | GNQS   | QCKTRY   |
| lcl Glyma.15G157100_38-87     | VCRP      | CYEYERSE     |          | GNQS   | QCKTRY   |
| lcl Glyma.08G088400_32-81     | VCRP      | CYEYERSE     |          | GNHC   | QCKTRY   |
| lcl Glyma.08G302500_39-88     | LCHS      | CYEYELKH     |          | MSQS   | QCKTAF   |
| lcl Glyma.18G117100_39-88     | LCHS      | CYEYELKN     |          | VSQS   | QCKTTF   |
| lcl Glyma.04G063800_9-58      | ICKA      | CFEYEINE     |          | GRKV   | CLRCATPY |
| lcl Glyma.06G065000_6-58      | ICKA      | CFEYEINE     |          | GRKV   | CLRCATPY |
| lcl Glyma.05G160000_385-436   | ICKD      | CFEHEINE     |          | DHRV   | CMRCGTP  |
| lcl Glyma.08G117500_6-58      | ICKD      | CFEHEINE     |          | DHRV   | CMRCGTP  |
| lcl Glyma.12G017600_131-178   | ICRD      | CYKDAAKA     |          | GDGI   | CPGCKEFP |
| lcl Glyma.02G090900_13-60     | LKYAHKK   | CVQRWCNEKG   |          | DTICE  | ICQ      |
| lcl Glyma.18G292200_14-61     | LKYAHKK   | CVQRWCNEKG   |          | DTICE  | ICQ      |
| lcl Glyma.18G242400_64-112    | VKYVHKK   | CLDQWYNSKGR  |          | MILCE  | ICR      |
| lcl Glyma.02G103800_77-125    | IKFVHQD   | CLLQWLHNSN   |          | ARQCE  | VCK      |
| lcl Glyma.07G215200_80-128    | IKFVHQD   | CLLQWLHNSN   |          | ARQCE  | VCK      |
| lcl Glyma.13G372600_71-120    | QKYVHRS   | CLDNWRSTKEGF |          | AFSHT  | ECR      |
| lcl Glyma.15G001100_69-118    | QKYVHRS   | CLDNWRSTKEGF |          | AFSHT  | ECR      |
| lcl Glyma.11G236400_33-82     | SKYVHRE   | CLDHWRAIKEGF |          | AFAHCT | TCK      |
| lcl Glyma.18G020800_33-82     | SKYVHRE   | CLDHWRAIKEGF |          | AFAHCT | TCK      |
| lcl Glyma.05G182200_29-78     | SKYVHRE   | CLDHWRAVKEGF |          | AFAHCT | TCK      |
| lcl Glyma.05G010700_54-89     | QQFVHRS   | CLDHW        |          |        |          |
| lcl Glyma.17G118400_55-107    | QQFVHRS   | CLDHWRSVKEGF |          | AFSHT  | TCK      |
| lcl Glyma.02G310000_267-316   | LALAHQE   | CAVKWFSIKGN  |          | RTCD   | VCK      |
| lcl Glyma.14G002700_268-317   | LALAHQE   | CAVKWFSIKGN  |          | RTCD   | VCK      |
| lcl Glyma.03G180200_231-280   | LALAHQE   | CAVKWFSIKGN  |          | RTCD   | VCK      |
| lcl Glyma.19G180900_243-292   | LALAHQE   | CAVKWFSIKGN  |          | RTCD   | VCK      |
| lcl Glyma.13G005300_253-302   | LALAHQD   | CAVKWFSIKGN  |          | KTCD   | VCK      |
| lcl Glyma.20G064600_253-302   | LALAHQD   | CAVKWFSIKGN  |          | KTCD   | VCK      |
| lcl Glyma.11G147100_266-315   | LALAHQE   | CAIKWFSIKGN  |          | KTCD   | VCK      |
| lcl Glyma.12G068000_266-315   | LALAHQE   | CAIKWFSIKGN  |          | KTCD   | VCK      |
| lcl Glyma.12G173300_234-283   | LALAHQE   | CAIKWFSIKGN  |          | KTCD   | VCK      |
| lcl Glyma.13G326500_259-308   | LALAHQE   | CAIKWFSIKGN  |          | KTCD   | VCK      |
| lcl Glyma.10G051800_240-289   | LSLAHRG   | CAVKWFTIKGN  |          | RTCD   | VCK      |
| lcl Glyma.13G139200_260-309   | LSLAHRG   | CAVKWFTIKGN  |          | RTCD   | VCK      |
| lcl Glyma.13G213600_217-265   | LRLVHEE   | CLVKWFSTKGD  |          | KKCD   | VCR      |
| lcl Glyma.15G099100_214-262   | LRLVHEE   | CLIKWFSTKGD  |          | KECD   | VCR      |
| lcl Glyma.01G107700_99-151    | LGAAHKN   | CAEAWFKIKGN  |          | RTCE   | IC       |
| lcl Glyma.U027600_104-157     | LGAAHKN   | CAEAWFKIKGN  |          | RTCE   | IC       |
| lcl Glyma.07G142300_108-159   | LAAAHKH   | CAEAWFKIKGN  |          | RTCE   | IC       |
| lcl Glyma.02G253000_84-135    | LAAAHKQ   | CAEAWFKIKGN  |          | KTCE   | IC       |
| lcl Glyma.14G063500_84-135    | LAAAHKQ   | CAEAWFKIKGN  |          | KTCE   | IC       |
| lcl Glyma.13G227900_172-233   | LGI AH AH | CAEAWFKLKG   |          | RSCE   | IC       |
| lcl Glyma.15G084600_183-244   | LGI AH VH | CAEAWFKLKG   |          | RLCE   | IC       |
| lcl Glyma.04G063700_161-222   | LGI AH GH | CAEAWFKLKG   |          | RLCE   | IC       |
| lcl Glyma.06G064900_158-219   | PGI AH VH | CALAWFKLKG   |          | MLCE   | IC       |
| lcl Glyma.05G159600_181-243   | LGIVHSH   | CAEAWFKLKG   |          | RLCE   | IC       |
| lcl Glyma.04G084500_138-184   | IHEE      | CLMKWRTKGR   |          | SASCV  | ICR      |
| lcl Glyma.06G086100_152-198   | IHEE      | CLIKWRTKGR   |          | SASCV  | ICR      |
| lcl Glyma.02G232900_1829-1880 | FHSA      | CLYKWFSTSHK  |          | S.S    | CP       |
| lcl Glyma.01G095300_99-145    | FHQD      | CIDLWLR      |          | SHKT   | CP       |
| lcl Glyma.08G270800_99-145    | FHQD      | CIDLWLR      |          | SHKT   | CP       |
| lcl Glyma.01G017200_110-156   | FHQE      | CIDLWLR      |          | SHKT   | CP       |
| lcl Glyma.02G210700_138-184   | FHPD      | CIDAWLV      |          | NHST   | CP       |
| lcl Glyma.14G178400_137-183   | FHSD      | CIDAWLA      |          | NHST   | CP       |
| lcl Glyma.04G098100_128-174   | FHSD      | CIDAWLA      |          | NHST   | CP       |
| lcl Glyma.06G099800_131-177   | FHSE      | CIDAWLA      |          | NHST   | CP       |
| lcl Glyma.10G156500_116-162   | FHPE      | CIDEWLA      |          | SHTT   | CP       |
| lcl Glyma.20G231900_117-163   | FHPE      | CIDEWLA      |          | SHTT   | CP       |
| lcl Glyma.19G236800_118-164   | FHPE      | CIDEWLG      |          | SHTT   | CP       |
| lcl Glyma.03G239900_110-156   | FHPE      | CIDEWLS      |          | SHTT   | CP       |
| lcl Glyma.09G140700_126-172   | FHPH      | CIDSWLA      |          | CHVT   | CP       |
| lcl Glyma.16G194600_116-162   | FHPH      | CIDSWLT      |          | SHVT   | CP       |
| lcl Glyma.09G140800_108-154   | FHAH      | CIDAWLA      |          | AHVT   | CP       |
| lcl Glyma.11G242800_110-156   | FHQH      | CIDTWLP      |          | SRMT   | CP       |
| lcl Glyma.14G037000_80-126    | FHQH      | CIDAWLP      |          | SHMN   | CP       |
| lcl Glyma.06G118400_62-106    | FQQH      | CIDVWSS      |          | SHIN   | CP       |
| lcl Glyma.01G017300_141-187   | FHLP      | CIDTWLK      |          | SHSS   | CP       |
| lcl Glyma.09G205600_131-177   | FHLP      | CIDTWLK      |          | SHSS   | CP       |
| lcl Glyma.01G095600_140-186   | FHAP      | CIDTWLK      |          | SHSS   | CP       |
| lcl Glyma.08G271100_141-187   | FHAP      | CIDTWLK      |          | SHSS   | CP       |
| lcl Glyma.04G128100_143-189   | FHLP      | CIDTWLK      |          | SHAT   | CP       |
| lcl Glyma.06G310600_135-181   | FHLP      | CIDTWLK      |          | SHAT   | CP       |
| lcl Glyma.02G210400_152-198   | FHVP      | CIDTWLR      |          | SHTN   | CP       |
| lcl Glyma.14G177900_153-199   | FHVP      | CIDTWLR      |          | SHTN   | CP       |
| lcl Glyma.08G070100_155-204   | FHLP      | CIDTWLR      |          | SHTN   | CP       |
| lcl Glyma.13G042300_156-201   | FHLP      | CIDTWLR      |          | SHTN   | CP       |
| lcl Glyma.08G177000_180-226   | FHLP      | CIDTWLR      |          | SHTN   | CP       |
| lcl Glyma.15G056000_166-212   | FHLP      | CIDTWLR      |          | SHTN   | CP       |
| lcl Glyma.05G175400_149-200   | FHIP      | CIDTWLR      |          | SHKN   | CP       |
| lcl Glyma.18G014500_194-240   | FHIS      | CIDTWLR      |          | SHKS   | CP       |
| lcl Glyma.18G014600_153-202   | FHIP      | CIDTWLR      |          | SHKS   | CP       |
| lcl Glyma.11G242500_156-205   | FHVP      | CVDTWLR      |          | SHKT   | CP       |
| lcl Glyma.11G122400_135-179   | FHVD      | CIDAWLR      |          | SHAN   | CP       |
| lcl Glyma.12G047300_133-176   | FHVD      | CIDAWLR      |          | SHAN   | CP       |

|                             |            |                |         |      |
|-----------------------------|------------|----------------|---------|------|
| lc1 Glyma.01G032200_147-191 | .FHIE..... | .CIDTWLL.....  | .SNSTCP | .LCR |
| lc1 Glyma.02G033200_149-193 | .FHIE..... | .CIDTWLL.....  | .SNSTCP | .LCR |
| lc1 Glyma.13G071600_172-216 | .FHIS..... | .CIDTWLL.....  | .SNSTCP | .LCR |
| lc1 Glyma.19G011200_168-212 | .FHIS..... | .CIDTWLL.....  | .SNSTCP | .LCR |
| lc1 Glyma.08G289200_148-194 | .FHID..... | .CIDTWLL.....  | .SNSTCP | .LCR |
| lc1 Glyma.18G135300_149-195 | .FHID..... | .CIDTWLL.....  | .SNSTCP | .LCR |
| lc1 Glyma.05G035800_139-185 | .FHMN..... | .CLDMWLL.....  | .SNSTCP | .LCR |
| lc1 Glyma.17G091600_134-180 | .FHMN..... | .CLDTWLL.....  | .SNSTCP | .LCR |
| lc1 Glyma.13G092000_129-175 | .FHME..... | .CIDTWLL.....  | .SHSTCP | .LCR |
| lc1 Glyma.17G068300_125-171 | .FHME..... | .CIDTWLL.....  | .SHSTCP | .LCR |
| lc1 Glyma.03G103800_137-183 | .FHAЕ..... | .CIDTWLQ.....  | .SNLSCP | .LCR |
| lc1 Glyma.07G120300_138-184 | .FHAЕ..... | .CIDTWLQ.....  | .SNLSCP | .LCR |
| lc1 Glyma.15G183300_121-167 | .FHAЕ..... | .CIDTWLR.....  | .SKLTCP | .LCR |
| lc1 Glyma.01G146500_110-156 | .FHID..... | .CIDHWLE.....  | .KHSSCP | .LCR |
| lc1 Glyma.09G194100_115-161 | .FHID..... | .CIDHWLE.....  | .KHSTCP | .LCR |
| lc1 Glyma.04G083400_113-140 | .....      | .....          | .NHSTCP | .LCR |
| lc1 Glyma.06G084800_126-176 | .FHMN..... | .CIDKWFЕ.....  | .SHSTCP | .LCR |
| lc1 Glyma.14G146700_132-182 | .FHMN..... | .CIDKWLE.....  | .SHSSCP | .LCR |
| lc1 Glyma.02G106400_97-139  | .FHVE..... | .CVDSWLD.....  | .VHSMCP | .LCR |
| lc1 Glyma.04G091400_117-163 | .FHVE..... | .CVDTWLD.....  | .AHSTCP | .LCR |
| lc1 Glyma.03G215500_93-139  | .FHAH..... | .CIDTWFG.....  | .SHSKCP | .LCR |
| lc1 Glyma.19G212000_90-136  | .FHAH..... | .CIDTWIG.....  | .SHSTCP | .LCR |
| lc1 Glyma.02G016800_86-132  | .FHAH..... | .CVDIWFH.....  | .SHSNCP | .LCR |
| lc1 Glyma.07G046400_108-154 | .FHVD..... | .CIDMWFH.....  | .SHSTCP | .LCR |
| lc1 Glyma.16G014600_107-153 | .FHVD..... | .CIDMWFH.....  | .SHSTCP | .LCR |
| lc1 Glyma.03G263000_99-148  | .FHVA..... | .CIDMWFQ.....  | .SHSTCP | .LCR |
| lc1 Glyma.07G245400_93-139  | .FHTE..... | .CIDVWFQ.....  | .SHATCP | .LCR |
| lc1 Glyma.17G028400_95-141  | .FHTE..... | .CIDMWFQ.....  | .SHATCP | .LCR |
| lc1 Glyma.09G042400_118-164 | .FHIE..... | .CIDMWFH.....  | .SHDTCP | .LCR |
| lc1 Glyma.13G332800_88-134  | .FHAS..... | .CIDTWFR.....  | .SHSNCP | .LCR |
| lc1 Glyma.06G284600_119-165 | .FHVD..... | .CIDTWLD.....  | .SHSTCP | .LCR |
| lc1 Glyma.12G121400_124-171 | .FHVD..... | .CIDKWLG.....  | .SHSTCP | .LCR |
| lc1 Glyma.12G208600_102-147 | .FHVS..... | .CIDTWLS.....  | .SHSTCP | .LCR |
| lc1 Glyma.13G292600_94-142  | .FHVG..... | .CIDTWLA.....  | .SHSTCP | .LCR |
| lc1 Glyma.09G214600_99-144  | .FHVA..... | .CIDMWLS.....  | .SHSSCP | .LCR |
| lc1 Glyma.16G075300_86-130  | .FHVA..... | .CIDAWLY.....  | .SHSNCP | .LCR |
| lc1 Glyma.13G108500_112-158 | .FHAP..... | .CIDMWLY.....  | .SHFDCP | .LCR |
| lc1 Glyma.17G050900_108-154 | .FHAP..... | .CIDMWLY.....  | .SHLDCP | .LCR |
| lc1 Glyma.18G176200_157-203 | .FHAS..... | .CIDWLS.....   | .NHSNCP | .LCR |
| lc1 Glyma.02G228800_114-163 | .FHME..... | .CIDMWLS.....  | .SHCNCP | .LCR |
| lc1 Glyma.01G157400_104-150 | .FHVP..... | .CIDTWLG.....  | .SHSSCP | .LCR |
| lc1 Glyma.11G087600_104-150 | .FHVP..... | .CIDTWLG.....  | .SHSSCP | .LCR |
| lc1 Glyma.04G015200_96-142  | .FHVS..... | .CIDAWLR.....  | .SHSSCP | .LCR |
| lc1 Glyma.06G015200_96-142  | .FHVS..... | .CIDAWLR.....  | .SHSSCP | .LCR |
| lc1 Glyma.09G196700_100-146 | .FHVA..... | .CVDTWLA.....  | .SHSSCP | .LCR |
| lc1 Glyma.16G112200_99-145  | .FHVA..... | .CVDTWLA.....  | .SHSSCP | .LCR |
| lc1 Glyma.04G215600_139-185 | .FHVR..... | .CIDKWLS.....  | .SHSSCP | .LCR |
| lc1 Glyma.06G150400_141-187 | .FHIR..... | .CIDKWLS.....  | .SHSSCP | .LCR |
| lc1 Glyma.05G188900_144-190 | .FHVC..... | .CIDKWLS.....  | .SHSSCP | .LCR |
| lc1 Glyma.08G146600_143-189 | .FHVR..... | .CIDKWLS.....  | .SHSSCP | .LCR |
| lc1 Glyma.09G275300_113-159 | .FHVR..... | .CIDTWLL.....  | .SHSSCP | .LCR |
| lc1 Glyma.18G214200_108-154 | .FHVR..... | .CIDTWLL.....  | .SHSSCP | .LCR |
| lc1 Glyma.07G173600_79-113  | .FHVR..... | .CINMWLL.....  | .SHSSCP | .LCR |
| lc1 Glyma.06G143100_111-157 | .FHVR..... | .CIDTWLL.....  | .SHSSCP | .LCR |
| lc1 Glyma.08G088100_109-152 | .FHVV..... | .CIDKWLL.....  | .SHSSCP | .LCR |
| lc1 Glyma.15G157400_108-152 | .FHVD..... | .CIDKWLL.....  | .SHSSCP | .LCR |
| lc1 Glyma.04G182100_194-239 | .FHVE..... | .CIDEWLR.....  | .LNVNCP | .LCR |
| lc1 Glyma.06G183300_233-278 | .FHVE..... | .CIDEWLR.....  | .LNVNCP | .LCR |
| lc1 Glyma.05G037000_234-279 | .FHVE..... | .CIDEWLR.....  | .LNVKCP | .LCR |
| lc1 Glyma.17G090200_234-279 | .FHVE..... | .CIDEWLR.....  | .LNVKCP | .LCR |
| lc1 Glyma.11G191800_129-174 | .FHPH..... | .CIDTWLD.....  | .KQVTCP | .LCR |
| lc1 Glyma.01G151700_511-557 | .FHTT..... | .CVDKWLKE..... | .IHRVCP | .LCR |
| lc1 Glyma.09G216900_511-557 | .FHTT..... | .CVDKWLKE..... | .IHRVCP | .LCR |
| lc1 Glyma.16G076000_519-565 | .FHRT..... | .CIDKWLKE..... | .IHRVCP | .LCR |
| lc1 Glyma.16G107700_522-568 | .FHRT..... | .CIDKWLKE..... | .IHRVCP | .LCR |
| lc1 Glyma.13G165500_478-524 | .YHMS..... | .CVDKWLKE..... | .IHGVCB | .LCR |
| lc1 Glyma.17G105500_479-525 | .YHMS..... | .CVDKWLKE..... | .IHGVCB | .LCR |
| lc1 Glyma.01G217300_329-374 | .FHCV..... | .CVDKWLY.....  | .INATCP | .LCR |
| lc1 Glyma.11G026000_332-377 | .FHCV..... | .CVDKWLY.....  | .INATCP | .LCR |
| lc1 Glyma.05G048800_325-370 | .FHCA..... | .CVDKWLH.....  | .INATCP | .LCR |
| lc1 Glyma.17G130700_323-368 | .FHCA..... | .CVDKWLH.....  | .INATCP | .LCR |
| lc1 Glyma.09G265600_314-359 | .FHCT..... | .CIDKWLL.....  | .INATCP | .LCR |
| lc1 Glyma.18G225500_320-365 | .FHCT..... | .CIDKWLL.....  | .INATCP | .LCR |
| lc1 Glyma.02G085200_305-350 | .FHSS..... | .CIVKWLK.....  | .MNAFCP | .LCR |
| lc1 Glyma.07G170200_304-349 | .FHSS..... | .CIVKWLK.....  | .MNAFCP | .LCR |
| lc1 Glyma.05G238900_292-337 | .FHST..... | .CIVKWLK.....  | .MNAFCP | .LCR |
| lc1 Glyma.08G046000_293-338 | .FHST..... | .CIVKWLK.....  | .MNAFCP | .LCR |
| lc1 Glyma.03G120200_273-318 | .FHCE..... | .CIGRWLQ.....  | .TKATCP | .LCR |
| lc1 Glyma.19G124800_275-320 | .FHCG..... | .CISRWLR.....  | .TKATCP | .LCR |
| lc1 Glyma.02G302400_289-335 | .FHLK..... | .CVDQWLK.....  | .IISCCP | .LCR |
| lc1 Glyma.14G011800_289-335 | .FHLK..... | .CVDQWLK.....  | .IISCCP | .LCR |
| lc1 Glyma.08G332300_279-325 | .FHLK..... | .CVDQWLR.....  | .IISCCP | .LCR |
| lc1 Glyma.18G074600_278-324 | .FHLK..... | .CVDQWLR.....  | .IISCCP | .LCR |
| lc1 Glyma.13G361000_365-409 | .FHVE..... | .CIDKWLK.....  | .INATCP | .LCR |
| lc1 Glyma.15G012900_392-436 | .FHVM..... | .CVDKWLK.....  | .INATCP | .LCR |
| lc1 Glyma.14G129100_343-387 | .FHKD..... | .CVDKWLK.....  | .INALCP | .LCR |
| lc1 Glyma.17G203800_375-419 | .FHKD..... | .CVDKWLK.....  | .INALCP | .LCR |
| lc1 Glyma.01G162900_187-232 | .FHLP..... | .CIDKWLFР..... | .HGSB   | .LCR |
| lc1 Glyma.11G080500_187-232 | .FHLP..... | .CIDKWLFР..... | .HGSB   | .LCR |
| lc1 Glyma.02G044300_186-231 | .FHLP..... | .CIDKWLIK..... | .HGSB   | .LCR |
| lc1 Glyma.04G143800_84-127  | .FHLV..... | .CIDKWLVQ..... | .QGSB   | .MCK |
| lc1 Glyma.08G316400_182-225 | .FHSV..... | .CIDKWLVQ..... | .QGSB   | .MCR |
| lc1 Glyma.18G096600_201-244 | .FHLV..... | .CIDKWLVQ..... | .RRSБ   | .MCR |
| lc1 Glyma.02G291200_187-233 | .FHLE..... | .CIDKWLVQ..... | .QGSB   | .MCR |
| lc1 Glyma.05G025200_170-216 | .FHLI..... | .CVDKWLVK..... | .NDSB   | .VCR |
| lc1 Glyma.17G101800_167-213 | .FHLI..... | .CVDKWLVK..... | .NDSB   | .VCR |
| lc1 Glyma.10G124600_688-735 | .FHKD..... | .CIDPWLRQ..... | .KTSB   | .VCK |
| lc1 Glyma.20G076700_718-765 | .FHKD..... | .CIDPWLRQ..... | .KASB   | .VCK |
| lc1 Glyma.10G217500_232-277 | .FHAA..... | .CIVDSWLT..... | .WRTFCP | .VCK |
| lc1 Glyma.20G174500_247-292 | .FHAA..... | .CIVDSWLT..... | .WRTFCP | .VCK |
| lc1 Glyma.11G137400_208-259 | .FHAN..... | .CIDPWLRQ..... | .QGTB   | .VCK |
| lc1 Glyma.12G060800_236-287 | .FHAN..... | .CIDPWLRQ..... | .QGTB   | .VCK |
| lc1 Glyma.11G220200_212-254 | .FHAN..... | .CIDPWLRQ..... | .QGTB   | .VCK |

|                             |            |                 |          |     |             |         |
|-----------------------------|------------|-----------------|----------|-----|-------------|---------|
| lc1 Glyma.18G037200_212-254 | .FHAN..... | .CIDPWLRQ.....  | .QGT     | CP  | .VCK        |         |
| lc1 Glyma.02G194400_103-147 | .FHLK..... | .CIDPWLR.....   | .LHPT    | CP  | .LCRTS      |         |
| lc1 Glyma.10G083100_103-147 | .FHLK..... | .CIDPWLR.....   | .LHPT    | CP  | .LCRTS      |         |
| lc1 Glyma.03G203400_104-149 | .FHLK..... | .CIDPWLR.....   | .LHPT    | CP  | .LCRTS      |         |
| lc1 Glyma.10G121100_107-150 | .FHRE..... | .CIDRWLQ.....   | .VNLS    | CP  | .MCR        |         |
| lc1 Glyma.10G121500_113-160 | .FHRD..... | .CIDMWLQ.....   | .LNLT    | CP  | .LCRTS      |         |
| lc1 Glyma.03G017500_84-127  | .FHLS..... | .CIDMWLR.....   | .KQST    | CP  | .VCR        |         |
| lc1 Glyma.07G078800_84-127  | .FHLS..... | .CIDMWLR.....   | .KQST    | CP  | .VCR        |         |
| lc1 Glyma.09G264300_89-135  | .FHLS..... | .CIDIWLRL.....  | .KQST    | CP  | .VCR        |         |
| lc1 Glyma.18G227700_89-135  | .FHLS..... | .CIDIWLRL.....  | .KQST    | CP  | .VCR        |         |
| lc1 Glyma.10G202500_86-132  | .FHVT..... | .CIDLWLQ.....   | .QNST    | CP  | .VCR        |         |
| lc1 Glyma.20G187900_86-132  | .FHVT..... | .CIDLWLQ.....   | .QNST    | CP  | .VCR        |         |
| lc1 Glyma.09G001600_110-156 | .FHMS..... | .CIDLWLA.....   | .THTT    | CP  | .LCRFSL     |         |
| lc1 Glyma.05G217000_334-378 | .FHAD..... | .CIDEWLR.....   | .LNAT    | CP  | .LCR        |         |
| lc1 Glyma.08G022900_332-375 | .YHAA..... | .CIDHWLK.....   | .LNAT    | CP  | .LCR        |         |
| lc1 Glyma.07G056200_314-357 | .FHAD..... | .CIDEWLR.....   | .INTT    | CP  | .VCR        |         |
| lc1 Glyma.16G025100_320-363 | .FHAD..... | .CIDEWLR.....   | .INTT    | CP  | .VCR        |         |
| lc1 Glyma.19G255700_319-362 | .FHAE..... | .CIDEWLR.....   | .MNST    | CP  | .VCR        |         |
| lc1 Glyma.06G127300_326-371 | .FHAQ..... | .CIDEWLP.....   | .LNAS    | CP  | .ICRTS      |         |
| lc1 Glyma.07G062800_119-162 | .FHLC..... | .CLDPWLK.....   | .LNGS    | CP  | .VCR        |         |
| lc1 Glyma.16G030900_115-158 | .FHLC..... | .CLDPWLK.....   | .LNGS    | CP  | .VCR        |         |
| lc1 Glyma.09G253500_112-155 | .FHLC..... | .CLDSWLK.....   | .LNGS    | CP  | .VCR        |         |
| lc1 Glyma.18G239400_89-132  | .FHLC..... | .CLDSWLK.....   | .LNGS    | CP  | .VCR        |         |
| lc1 Glyma.09G253400_107-153 | .FHKD..... | .CVDAWLK.....   | .VKTS    | CP  | .ICRNSL     |         |
| lc1 Glyma.02G264800_105-151 | .FHCE..... | .CVDKWL.....    | .NHSN    | CP  | .LCRASL     |         |
| lc1 Glyma.14G058000_100-146 | .FHCE..... | .CVDKWL.....    | .NHSN    | CP  | .LCRASL     |         |
| lc1 Glyma.11G231400_107-153 | .FHCD..... | .CVDKWL.....    | .HHSS    | CP  | .LCRASL     |         |
| lc1 Glyma.18G025700_107-153 | .FHCD..... | .CVDKWL.....    | .HHSS    | CP  | .LCRASL     |         |
| lc1 Glyma.11G169500_92-138  | .FHSE..... | .CLGMWLS.....   | .AHPS    | CP  | .LCRASL     |         |
| lc1 Glyma.18G060400_108-154 | .FHSE..... | .CLGMWLS.....   | .GHPS    | CP  | .LCRASL     |         |
| lc1 Glyma.01G093800_57-96   | .FHKG..... | .CLDRWL.....    | .VSR     |     | .MPR        |         |
| lc1 Glyma.04G153400_57-104  | .FHKG..... | .CLDRWVGF.....  | .NA      | .T  | CP          | .LCRGS  |
| lc1 Glyma.04G153500_74-120  | .FHRD..... | .CLNTWVGF.....  | .NA      | .T  | CP          | .LCR    |
| lc1 Glyma.13G115900_83-134  | .FHRE..... | .CIERWLEHE..... | .HENHIPT | CP  | .LCRAPL     |         |
| lc1 Glyma.17G043900_85-135  | .FHRE..... | .CIERWLEHE..... | .HENHSAT | CP  | .ICRAP      |         |
| lc1 Glyma.01G221300_81-127  | .FHRG..... | .CLDRWVGF.....  | .QR      | .T  | CP          | .LCRTPF |
| lc1 Glyma.11G022400_87-133  | .FHRG..... | .CLDRWVGF.....  | .QR      | .T  | CP          | .LCRTPF |
| lc1 Glyma.05G210000_86-133  | .FHRG..... | .CLDRWVGF.....  | .QR      | .T  | CP          | .LCRTPF |
| lc1 Glyma.08G016700_85-132  | .FHRG..... | .CLDRWVGF.....  | .QR      | .T  | CP          | .LCRMPF |
| lc1 Glyma.17G159400_72-117  | .FHKR..... | .CLDHWVGF.....  | .MR      | .M  | CT          | .LCR    |
| lc1 Glyma.02G223600_99-145  | .FHKV..... | .CLEKWL.....    | .NI      | .T  | CP          | .LCRTP  |
| lc1 Glyma.14G190300_98-144  | .FHKV..... | .CLEKWL.....    | .NI      | .T  | CP          | .LCRTP  |
| lc1 Glyma.13G009100_96-142  | .FHKV..... | .CMEKWL.....    | .NI      | .T  | CP          | .LCRTSL |
| lc1 Glyma.05G182000_68-114  | .FHKD..... | .CLDQWL.....    | .QYC     | .AT | CP          | .LCRNKV |
| lc1 Glyma.08G139700_68-114  | .FHKD..... | .CLDQWL.....    | .QYC     | .AT | CP          | .LCRNKV |
| lc1 Glyma.11G236600_73-119  | .FHRD..... | .CLDKWL.....    | .QYW     | .AT | CP          | .LCRQV  |
| lc1 Glyma.18G020400_70-116  | .FHRD..... | .CLDKWL.....    | .QYW     | .AT | CP          | .LCRQV  |
| lc1 Glyma.05G218700_107-152 | .FHIS..... | .CISNWL.....    | .SN      | .ST | CP          | .LCRCSI |
| lc1 Glyma.08G024800_108-153 | .FHIS..... | .CISNWL.....    | .SN      | .ST | CP          | .LCRCSI |
| lc1 Glyma.13G002800_104-153 | .FHLE..... | .CIHHWL.....    | .SN      | .ST | CP          | .LCRCSI |
| lc1 Glyma.20G066300_104-153 | .FHFE..... | .CIHHWL.....    | .SN      | .ST | CP          | .LCRCSI |
| lc1 Glyma.10G007200_117-163 | .FHID..... | .CIDVWL.....    | .NN      | .AH | CP          | .LCRRTV |
| lc1 Glyma.20G088900_139-185 | .FHID..... | .CIDVWL.....    | .NN      | .AY | CP          | .LCRRTV |
| lc1 Glyma.10G187100_136-182 | .FHID..... | .CIDVWL.....    | .SN      | .AN | CP          | .LCRCSI |
| lc1 Glyma.20G203400_135-181 | .FHID..... | .CIDVWL.....    | .SN      | .AN | CP          | .LCRCSI |
| lc1 Glyma.19G163600_128-173 | .FHLH..... | .CIDIWL.....    | .TN      | .AN | CP          | .LCRCSI |
| lc1 Glyma.11G243400_93-139  | .FHRG..... | .CLDKWVGF.....  | .NKH     | .T  | CP          | .LCRS   |
| lc1 Glyma.18G013800_88-132  | .FHRG..... | .CLDKWVGF.....  | .NKH     | .T  | CP          | .LCRS   |
| lc1 Glyma.13G232800_104-150 | .FHVD..... | .CVDKWF.....    | .NSN     | .T  | CP          | .ICRTVV |
| lc1 Glyma.13G232800_105-147 | .FHVD..... | .CVDKWF.....    | .NSN     | .T  | CP          | .ICR    |
| lc1 Glyma.15G079900_101-151 | .FHAD..... | .CVDKWF.....    | .NSN     | .T  | CP          | .ICRTVV |
| lc1 Glyma.04G021200_74-120  | .FHVH..... | .CADTWLS.....   | .KHPL    | CP  | .VCRITKL    |         |
| lc1 Glyma.06G021400_73-119  | .FHVQ..... | .CADTWLS.....   | .KHPI    | CP  | .VCRITKL    |         |
| lc1 Glyma.14G221800_70-116  | .FHLE..... | .CADTWLS.....   | .KHPL    | CP  | .LCRAKL     |         |
| lc1 Glyma.17G260700_70-116  | .FHLE..... | .CADTWLS.....   | .EHP     | CP  | .LCRAKL     |         |
| lc1 Glyma.04G181300_83-127  | .FHVQ..... | .CIDSWL.....    | .QTPV    | CP  | .ICRT       |         |
| lc1 Glyma.06G183600_83-127  | .FHVQ..... | .CIDSWL.....    | .QTPV    | CP  | .ICRT       |         |
| lc1 Glyma.13G170300_69-114  | .FHAQ..... | .CVDTWLL.....   | .KTPI    | CP  | .ICRCN      |         |
| lc1 Glyma.19G010400_71-116  | .FHAQ..... | .CVDWLL.....    | .KTPI    | CP  | .TCRCN      |         |
| lc1 Glyma.13G092100_125-170 | .FHRT..... | .CVDTWLL.....   | .KVAA    | CP  | .TCRTPV     |         |
| lc1 Glyma.17G068200_100-145 | .FHRR..... | .CVDTWLL.....   | .KVAA    | CP  | .TCRTPV     |         |
| lc1 Glyma.10G244900_121-165 | .YHSA..... | .CLRLWLA.....   | .SHPH    | CP  | .YCRTPV     |         |
| lc1 Glyma.20G149700_120-164 | .YHSA..... | .CLRLWLA.....   | .AHPH    | CP  | .YCRTPV     |         |
| lc1 Glyma.01G048700_113-166 | .FHVN..... | .CIEKWLGM.....  | .HGS     | CP  | .VCRYEMPVEE |         |
| lc1 Glyma.02G108300_190-234 | .FHGN..... | .CIEKWLGM.....  | .HGS     | CP  | .VCRYE      |         |
| lc1 Glyma.02G071200_226-269 | .FHGD..... | .CIVSWLKL.....  | .HGS     | CP  | .VCR        |         |
| lc1 Glyma.16G152400_225-267 | .FHGD..... | .CIVSWLKL.....  | .HGS     | CP  | .VCR        |         |
| lc1 Glyma.18G000200_236-278 | .FHSG..... | .CILPWLEL.....  | .HSS     | CP  | .VCR        |         |
| lc1 Glyma.02G161600_186-230 | .YHSD..... | .CIVPWLVQ.....  | .HNS     | CP  | .VCRQEL     |         |
| lc1 Glyma.10G101400_186-230 | .YHSD..... | .CIVPWLVQ.....  | .HNS     | CP  | .VCRQEL     |         |
| lc1 Glyma.02G276700_252-296 | .YHSD..... | .CIVPWLVQ.....  | .HNS     | CP  | .VCRVEL     |         |
| lc1 Glyma.14G039000_202-246 | .YHSD..... | .CIVPWLVQ.....  | .HNS     | CP  | .VCRVEL     |         |
| lc1 Glyma.13G072800_206-250 | .YHSD..... | .CIVPWLVQ.....  | .HNS     | CP  | .VCRVEL     |         |
| lc1 Glyma.13G072900_126-169 | .YHSD..... | .CIVPWLVQ.....  | .HNS     | CP  | .VCR        |         |
| lc1 Glyma.04G251600_220-265 | .YHSD..... | .CIVPWLVQ.....  | .HNS     | CP  | .VCRHEV     |         |
| lc1 Glyma.08G185400_202-246 | .YHSD..... | .CIVPWLVQ.....  | .HNS     | CP  | .VCRHEV     |         |
| lc1 Glyma.15G047300_199-243 | .YHSD..... | .CIVPWLVQ.....  | .HNS     | CP  | .VCRHEV     |         |
| lc1 Glyma.09G165200_203-248 | .YHAD..... | .CILPWLEL.....  | .HNS     | CP  | .VCRHEV     |         |
| lc1 Glyma.16G213500_202-247 | .YHAD..... | .CILPWLEL.....  | .HNS     | CP  | .VCRHEV     |         |
| lc1 Glyma.10G285300_179-224 | .YHGD..... | .CILPWLR.....   | .HNS     | CP  | .VCRHEV     |         |
| lc1 Glyma.20G103700_178-223 | .YHGD..... | .CILPWLR.....   | .HNS     | CP  | .VCRHEV     |         |
| lc1 Glyma.02G249100_188-232 | .YHAE..... | .CILPWLA.....   | .KNS     | CP  | .VCRHEL     |         |
| lc1 Glyma.14G067300_187-231 | .YHAE..... | .CILPWLA.....   | .KNS     | CP  | .VCRHEL     |         |
| lc1 Glyma.11G220400_185-229 | .YHPE..... | .CILPWLA.....   | .HNS     | CP  | .VCRHEL     |         |
| lc1 Glyma.18G037000_174-209 | .YHPE..... | .CILPWLA.....   | .HNS     | CP  | .VCR        |         |
| lc1 Glyma.07G134600_158-202 | .YHSE..... | .CIVPWSV.....   | .RNS     | CP  | .VCRHEV     |         |
| lc1 Glyma.18G184200_159-203 | .YHSE..... | .CIVPWSV.....   | .RNS     | CP  | .VCRHEV     |         |
| lc1 Glyma.11G137300_184-228 | .YHSD..... | .CILPWLSM.....  | .RNS     | CP  | .VCRHEL     |         |
| lc1 Glyma.12G060700_182-226 | .YHSD..... | .CILPWLSM.....  | .RNS     | CP  | .VCRHEL     |         |
| lc1 Glyma.13G338400_153-197 | .YHSD..... | .CILPWLSM.....  | .RNS     | CP  | .VCRHEL     |         |
| lc1 Glyma.15G036100_152-197 | .YHSD..... | .CILPWLSM.....  | .RNS     | CP  | .VCRHEL     |         |
| lc1 Glyma.10G286700_262-306 | .YHGD..... | .CIVPWLS.....   | .RNS     | CP  | .VCRYEL     |         |
| lc1 Glyma.20G102400_259-303 | .YHGD..... | .CIVPWLS.....   | .RNS     | CP  | .VCRYEL     |         |



|                               |             |    |         |       |         |             |    |    |      |       |
|-------------------------------|-------------|----|---------|-------|---------|-------------|----|----|------|-------|
| lcl Glyma.05G017500_280-324   | .YHED.....  | CI | VPWLG I | ..... | RNT     | CP          | .. | V  | CR   | YEF   |
| lcl Glyma.09G271200_369-413   | .YHIN.....  | CI | LPWLSA  | ..... | RNS     | CP          | .. | L  | CR   | YEL   |
| lcl Glyma.18G218200_373-417   | .YHNN.....  | CI | LPWLSA  | ..... | RNS     | CP          | .. | L  | CR   | YEL   |
| lcl Glyma.08G158300_95-136    | .YHSD.....  | CI | TPWLEL  | ..... | HAS     | CP          | .. | L  | CR   | ..    |
| lcl Glyma.15G268100_109-150   | .YHSD.....  | CI | TPWLEL  | ..... | NSS     | CP          | .. | L  | CR   | ..    |
| lcl Glyma.08G034000_52-100    | .YHSN.....  | CI | TLWLEH  | ..... | CNS     | CP          | .. | L  | CR   | CHI   |
| lcl Glyma.06G272400_167-215   | .FHED.....  | CI | VPWLTS  | ..... | KGO     | CP          | .. | V  | CR   | FVI   |
| lcl Glyma.12G131800_171-215   | .FHED.....  | CI | VPWLTS  | ..... | KGO     | CP          | .. | V  | CR   | FVI   |
| lcl Glyma.06G274300_168-216   | .FHED.....  | CI | VPWLTS  | ..... | KGO     | CP          | .. | V  | CR   | FVI   |
| lcl Glyma.17G213300_14-59     | .FHED.....  | CI | VPWLTS  | ..... | KGO     | CP          | .. | V  | CR   | FLI   |
| lcl Glyma.18G103300_98-136    | .FHKD.....  | CI | VPWLK   | ..... | MGN     | OS          | .. | .. | ..   | ..    |
| lcl Glyma.12G223700_140-184   | .FHSD.....  | CI | DHWLQK  | ..... | KLT     | CP          | .. | I  | CR   | ..    |
| lcl Glyma.13G277600_139-186   | .FHSD.....  | CI | DHWLQK  | ..... | KLT     | CP          | .. | I  | CR   | SCI   |
| lcl Glyma.12G151700_161-205   | .FHCD.....  | CI | KHWLEE  | ..... | KPS     | CP          | .. | I  | CR   | H     |
| lcl Glyma.13G211100_115-163   | .FHLS.....  | CV | NSWLLGG | ..... | G       | ..          | .. | V  | CR   | KDL   |
| lcl Glyma.17G211800_21-68     | .FHSS.....  | CI | NSWLLRG | ..... | KTT     | CP          | .. | V  | CR   | REL   |
| lcl Glyma.10G047200_194-237   | .FHHM.....  | CI | LPWLKG  | ..... | RNT     | CP          | .. | C  | CR   | ..    |
| lcl Glyma.13G135100_190-233   | .FHHM.....  | CI | LPWLKG  | ..... | RNT     | CP          | .. | C  | CR   | ..    |
| lcl Glyma.08G148600_91-141    | .FHEH.....  | CI | TRWLN M | ..... | NNT     | CP          | .. | L  | CR   | RTI   |
| lcl Glyma.12G223800_101-147   | .FHSY.....  | CI | EHWLKD  | ..... | NAT     | CP          | .. | V  | CR   | NCL   |
| lcl Glyma.09G096300_141-186   | .FHDR.....  | CL | KPWLEN  | ..... | NSY     | CP          | .. | C  | CR   | TTI   |
| lcl Glyma.15G201800_154-199   | .FHDR.....  | CL | KPWLEN  | ..... | NSH     | CP          | .. | C  | CR   | TTI   |
| lcl Glyma.10G259300_189-234   | .FHSV.....  | CL | DPWIRC  | ..... | CGD     | CP          | .. | Y  | CR   | RCI   |
| lcl Glyma.20G131600_187-232   | .FHSV.....  | CL | DPWIRC  | ..... | CGD     | CP          | .. | Y  | CR   | RSI   |
| lcl Glyma.17G172100_265-310   | .YHRH.....  | CI | RQWLLC  | ..... | RNF     | CP          | .. | V  | CR   | RV    |
| lcl Glyma.17G172200_262-307   | .YHRH.....  | CI | RQWLLC  | ..... | RNF     | CP          | .. | V  | CR   | RV    |
| lcl Glyma.03G110700_123-171   | .FHSE.....  | CI | IRW     | ..... | WKWLQ   | ..          | .. | N  | SN   | K     |
| lcl Glyma.10G289100_82-127    | .FHLN.....  | CI | EQWILRN | ..... | QFS     | CP          | .. | L  | CR   | ..    |
| lcl Glyma.20G099800_77-122    | .FHLN.....  | CI | DQWILRN | ..... | QFS     | CP          | .. | L  | CR   | ..    |
| lcl Glyma.16G006200_74-120    | .FHST.....  | CI | YKWLAS  | ..... | HFG     | CP          | .. | L  | CR   | TOI   |
| lcl Glyma.10G142800_16-53     | .FHLH.....  | CI | LKWVNSQ | ..... | T       | ..          | .. | M  | CR   | REW   |
| lcl Glyma.20G091400_16-53     | .FHLH.....  | CI | LKWVNSQ | ..... | T       | ..          | .. | M  | CR   | REW   |
| lcl Glyma.13G265400_16-53     | .FHLH.....  | CI | LKWVNSQ | ..... | T       | ..          | .. | M  | CR   | REW   |
| lcl Glyma.06G303600_75-104    | .FHFH.....  | CI | SRWLKTR | ..... | QV      | CP          | .. | L  | ..   | ..    |
| lcl Glyma.01G143600_200-252   | .FHHQ.....  | CI | VKWLQT  | ..... | SHT     | CP          | .. | L  | CR   | ..    |
| lcl Glyma.17G108900_203-255   | .FHHQ.....  | CI | VKWLQT  | ..... | SHT     | CP          | .. | L  | CR   | ..    |
| lcl Glyma.20G044300_97-142    | .FHLK.....  | CI | VSWLQT  | ..... | SHV     | CP          | .. | L  | CR   | YPL   |
| lcl Glyma.20G044600_112-155   | .FHHQ.....  | CI | VTWLQN  | ..... | SHM     | CP          | .. | L  | CR   | ..    |
| lcl Glyma.09G257100_165-208   | .FHLS.....  | CI | LEWME   | ..... | RSDS    | CP          | .. | I  | CD   | QE    |
| lcl Glyma.18G235300_138-182   | .FHLS.....  | CI | LEWME   | ..... | RSDS    | CP          | .. | I  | CD   | QKL   |
| lcl Glyma.08G016300_162-207   | .FHLA.....  | CI | LEWME   | ..... | RSET    | CP          | .. | V  | CD   | DDL   |
| lcl Glyma.08G251300_174-216   | .FHLG.....  | CI | YEWME   | ..... | RSDS    | CP          | .. | V  | C    | ..    |
| lcl Glyma.18G274000_173-215   | .FHLC.....  | CI | YEWME   | ..... | RSDN    | CP          | .. | V  | C    | ..    |
| lcl Glyma.13G052000_177-221   | .FHLG.....  | CI | YEWME   | ..... | RSDN    | CP          | .. | V  | CG   | KVL   |
| lcl Glyma.19G034700_177-219   | .FHLG.....  | CI | YEWME   | ..... | RSDN    | CP          | .. | V  | CG   | K     |
| lcl Glyma.13G206800_34-78     | .YHLH.....  | CI | IEWSQ   | ..... | RSKE    | CP          | .. | I  | CW   | QSL   |
| lcl Glyma.15G005300_166-208   | .FHCS.....  | CI | SKWAD   | ..... | SS      | ..          | .. | V  | CR   | ..    |
| lcl Glyma.01G019300_126-171   | .FHFP.....  | CI | ..      | ..    | V       | ..          | .. | V  | CNT  | SW    |
| lcl Glyma.09G203400_19-64     | .FHFP.....  | CI | ..      | ..    | V       | ..          | .. | V  | CNT  | SW    |
| lcl Glyma.01G097900_111-159   | .FHFP.....  | CI | AAH     | ..    | V       | ..          | .. | V  | CNAN | W     |
| lcl Glyma.08G273400_110-158   | .FHFP.....  | CL | AGH     | ..    | V       | ..          | .. | V  | CNAN | W     |
| lcl Glyma.02G218200_86-131    | .FHFP.....  | CV | SVS     | ..    | S       | ..          | .. | V  | C    | ..    |
| lcl Glyma.14G185600_109-152   | .FHFP.....  | CV | SVS     | ..    | S       | ..          | .. | V  | C    | ..    |
| lcl Glyma.09G017200_92-144    | .FHFA.....  | CI | SS      | ..    | N       | ..          | .. | V  | CR   | AHW   |
| lcl Glyma.15G122900_92-144    | .FHFA.....  | CI | SS      | ..    | N       | ..          | .. | V  | CR   | AHW   |
| lcl Glyma.07G270000_80-128    | .FHFA.....  | CI | SS      | ..    | N       | ..          | .. | V  | CR   | AHW   |
| lcl Glyma.01G050400_262-297   | .FHAE.....  | CL | EATPKT  | ..... | RKSDPP  | CP          | .. | V  | C    | ..    |
| lcl Glyma.02G109200_262-297   | .FHAE.....  | CL | EATPKT  | ..... | RKSDPP  | CP          | .. | V  | C    | ..    |
| lcl Glyma.12G235700_273-332   | .YHAE.....  | CL | ESLTSEV | ..... | NKYDPS  | CP          | .. | V  | C    | ..    |
| lcl Glyma.13G201200_274-333   | .YHAE.....  | CL | ESLTSEV | ..... | NKYDPS  | CP          | .. | V  | C    | ..    |
| lcl Glyma.07G049700_1718-1767 | .IHLQ.....  | CE | VSEIEGS | ..... | SKTSSSG | CP          | .. | V  | C    | ..    |
| lcl Glyma.16G018400_1710-1759 | .IHLQ.....  | CE | VSEIEES | ..... | SKTSSSG | CP          | .. | V  | C    | ..    |
| lcl Glyma.01G228500_290-332   | .FHVH.....  | CL | RSWLER  | ..... | QHT     | CP          | .. | T  | CR   | ALV   |
| lcl Glyma.11G011300_290-332   | .FHVH.....  | CL | RSWLER  | ..... | QHT     | CP          | .. | T  | CR   | ALV   |
| lcl Glyma.04G130500_337-383   | .FHLA.....  | CL | RSWLDQG | ..... | LT      | ..          | .. | T  | CR   | KPL   |
| lcl Glyma.06G316600_337-383   | .FHLA.....  | CL | RSWLDQG | ..... | LA      | ..          | .. | T  | CR   | KPL   |
| lcl Glyma.14G105900_232-269   | .FHPP.....  | CL | KPWL    | ..... | FYP     | ..          | .. | L  | C    | ..    |
| lcl Glyma.17G220500_232-277   | .FHPP.....  | CL | KPWLDE  | ..... | HNS     | CP          | .. | I  | CR   | HEL   |
| lcl Glyma.16G032000_12-61     | .FHEL.....  | CL | QWFEYS  | ..... | SKGKHT  | CP          | .. | I  | CR   | ..    |
| lcl Glyma.03G104400_860-896   | .FHLR.....  | CL | G       | ..    | DN      | ..          | .. | E  | C    | ..    |
| lcl Glyma.07G119500_861-897   | .FHLR.....  | CL | G       | ..    | DN      | ..          | .. | E  | C    | ..    |
| lcl Glyma.12G116100_524-572   | .FHSG.....  | CL | QRWMDI  | ..... | KME     | CP          | .. | T  | CR   | GPL   |
| lcl Glyma.12G205300_519-567   | .FHSG.....  | CL | QRWMDI  | ..... | KME     | CP          | .. | T  | CR   | RPL   |
| lcl Glyma.06G290800_524-572   | .FHSG.....  | CL | QRWMDI  | ..... | KME     | CP          | .. | T  | CR   | RPL   |
| lcl Glyma.13G295600_507-555   | .FHSG.....  | CL | QRWMDI  | ..... | KME     | CP          | .. | T  | CR   | RPL   |
| lcl Glyma.01G195200_69-131    | .TYERS..... | NI | LKWF    | ..    | ..      | NLG         | .. | H  | FT   | CP    |
| lcl Glyma.11G046500_134-196   | .TYERS..... | NI | LKWF    | ..    | ..      | NLG         | .. | H  | FT   | CP    |
| lcl Glyma.03G202600_12-76     | .TYDRE..... | SI | ETWL    | ..    | ..      | FSKK        | .. | N  | TT   | CP    |
| lcl Glyma.10G262600_10-74     | .TYDRE..... | SI | ETWL    | ..    | ..      | FSKK        | .. | N  | TT   | CP    |
| lcl Glyma.19G200200_10-74     | .TYDRE..... | SI | ETWL    | ..    | ..      | FSKK        | .. | N  | TT   | CP    |
| lcl Glyma.04G212300_16-53     | .TYDRS..... | SI | EKWF    | ..    | ..      | STG         | .. | N  | LT   | CP    |
| lcl Glyma.06G154100_14-76     | .TYDRS..... | SI | EKWF    | ..    | ..      | SAG         | .. | N  | LT   | CP    |
| lcl Glyma.05G192100_12-74     | .TYDRS..... | NI | EKWL    | ..    | ..      | ALG         | .. | N  | LT   | CP    |
| lcl Glyma.08G000400_12-74     | .TYDRS..... | NI | EKWL    | ..    | ..      | AQG         | .. | N  | LT   | CP    |
| lcl Glyma.05G189600_16-52     | .TYDRS..... | SI | QRWL    | ..    | ..      | DNG         | .. | N  | NT   | CP    |
| lcl Glyma.08G147200_16-52     | .TYDRS..... | SI | QRWL    | ..    | ..      | DNG         | .. | N  | NT   | CP    |
| lcl Glyma.07G106000_30-93     | .TYDRE..... | SV | ERWF    | ..    | ..      | DEG         | .. | N  | IT   | CP    |
| lcl Glyma.15G064800_12-50     | .TFDRS..... | SI | QRWL    | ..    | ..      | DAG         | .. | N  | HRT  | CP    |
| lcl Glyma.16G048700_180-229   | .IFCFP..... | CI | LQYL    | ..    | ..      | LMGEEDHKGDS | .. | W  | KR   | CP    |
| lcl Glyma.19G103000_221-270   | .IFCFP..... | CI | LQYL    | ..    | ..      | LMGEEDHKGDS | .. | W  | KR   | CP    |
| lcl Glyma.05G237500_1120-1165 | .YMHSA..... | CF | QAY     | ..    | ..      | TCNHYT      | .. | C  | I    | CSKSL |
| lcl Glyma.08G044700_1118-1163 | .YMHSA..... | CF | QAY     | ..    | ..      | TCSHYT      | .. | C  | I    | CSKSL |
| lcl Glyma.07G093700_1126-1171 | .YMHSS..... | CF | QAY     | ..    | ..      | TCSHYT      | .. | C  | I    | CSKSL |
| lcl Glyma.09G182600_1122-1167 | .YMHSS..... | CF | QAY     | ..    | ..      | TCSHYT      | .. | C  | I    | CSKSL |
| lcl Glyma.09G115100_1126-1168 | .YMHSA..... | CF | QAY     | ..    | ..      | TCSHYT      | .. | C  | I    | CSKSL |
| lcl Glyma.17G096900_1156-1201 | .VMHST..... | CF | QAY     | ..    | ..      | TCFNHT      | .. | C  | I    | CSKSL |
| lcl Glyma.14G130700_200-247   | .TIHKS..... | CL | NEMR    | ..    | ..      | EHFOYA      | .. | C  | L    | CKSV  |
| lcl Glyma.17G202700_200-247   | .TIHKS..... | CL | NEMR    | ..    | ..      | EHFOYS      | .. | C  | L    | CKSV  |
| lcl Glyma.06G074300_199-246   | .TIHKS..... | CL | KEMR    | ..    | ..      | EHFOYA      | .. | C  | L    | CKSV  |
| lcl Glyma.06G116800_4-50      | .SVCEA..... | CL | AELP    | ..    | ..      | QRYQDTI     | .. | R  | CP   | ..    |
| lcl Glyma.10G228500_5-52      | .SVCEA..... | CL | AELP    | ..    | ..      | QRYQDTI     | .. | R  | CP   | ..    |
| lcl Glyma.08G241700_44-77     | .TLCKN..... | CI | LGLQ    | ..... | ..      | ..          | .. | .. | ..   | ..    |
| lcl Glyma.04G134700_4-52      | .GFCRE..... | CL | SRMF    | ..... | SASSDAT | ..          | .. | LA | CP   | ..    |



|                               |             |             |                |     |    |   |            |
|-------------------------------|-------------|-------------|----------------|-----|----|---|------------|
| lcl Glyma.11G157400_5-54      | GFCRE.....  | CLSRMF..... | SASSDAT.....   | LA  | CP | R | CRHV..     |
| lcl Glyma.04G224200_401-445   | MFCEE.....  | CVSEWF..... | ERER.....      | T   | CP | L | CRALVK..   |
| lcl Glyma.06G140600_410-454   | MFCEE.....  | CVSEWF..... | ERER.....      | T   | CP | L | CRALVK..   |
| lcl Glyma.18G217900_377-421   | IFCED.....  | CVSEWF..... | ERER.....      | T   | CP | L | CRALVK..   |
| lcl Glyma.08G354400_21-65     | MCCFW.....  | CVYNSM..... | SCLRRES.....   | O   | CP | V | CR.....    |
| lcl Glyma.18G171400_21-65     | ICCFW.....  | CVYNSM..... | NCLRRES.....   | O   | CP | V | CR.....    |
| lcl Glyma.15G237300_55-95     | TICSG.....  | CKPRVH..... | N.....         | R   | CP | T | CRHEL..    |
| lcl Glyma.13G198800_100-140   | TICSG.....  | CKPRVH..... | N.....         | R   | CP | T | CRHEL..    |
| lcl Glyma.04G235700_61-101    | TLCST.....  | CKTRVH..... | N.....         | R   | CP | T | CRQEL..    |
| lcl Glyma.06G129000_62-102    | TLCST.....  | CKTRVH..... | N.....         | R   | CP | T | CRQEL..    |
| lcl Glyma.03G257700_48-88     | TLCST.....  | CKTRVH..... | N.....         | R   | CP | T | CRQEL..    |
| lcl Glyma.13G035400_631-678   | .FCPSKYYHVR | CLSSK.....  | QLKSYGNCW..... | Y   | CP | S | CR.....    |
| lcl Glyma.14G156600_631-678   | .FCPSKYYHVS | CLSSK.....  | QLKSYGNCW..... | Y   | CP | S | CR.....    |
| lcl Glyma.12G192700_673-714   | .FCKA.....  | CLIDF.....  | S.ASLGRVS..... |     | CP | T | CSK.....   |
| lcl Glyma.13G309700_670-711   | .FCKA.....  | CLIDF.....  | S.SSLGRVS..... |     | CP | T | CSK.....   |
| lcl Glyma.07G148900_159-201   | .MCMK.....  | CYEDW.....  | H.ARSQS.....   |     | CP | F | CR.....    |
| lcl Glyma.18G200100_157-199   | .MCMK.....  | CYEDW.....  | H.ARSQS.....   |     | CP | F | CR.....    |
| lcl Glyma.03G060000_142-184   | .LCMK.....  | CYRNW.....  | H.ARSQS.....   |     | CP | F | CR.....    |
| lcl Glyma.07G195400_147-189   | .MCLK.....  | CYREW.....  | R.TISQS.....   |     | CP | F | CR.....    |
| lcl Glyma.13G180900_147-189   | .MCLK.....  | CYREW.....  | R.TISQS.....   |     | CP | F | CR.....    |
| lcl Glyma.13G240800_150-198   | .MCLT.....  | CYHEW.....  | R.TRSQS.....   |     | CP | F | CRNSLKR..  |
| lcl Glyma.15G072700_147-189   | .MCLK.....  | CYHEW.....  | R.TRSQS.....   |     | CP | F | CR.....    |
| lcl Glyma.18G063500_143-185   | .MCLK.....  | CYRDW.....  | C.QRSQS.....   |     | CP | F | CR.....    |
| lcl Glyma.05G144300_156-204   | .MCIK.....  | CYRKK.....  | N.TRSES.....   |     | CP | F | CRGSLRRV.. |
| lcl Glyma.08G100700_156-204   | .MCIK.....  | CYRKK.....  | N.TRSES.....   |     | CP | F | CRGSLRRV.. |
| lcl Glyma.11G246100_158-206   | .MCIK.....  | CYRKK.....  | N.RKSES.....   |     | CP | F | CRGSLRRV.. |
| lcl Glyma.18G011100_158-206   | .MCIK.....  | CYRKK.....  | N.RKSES.....   |     | CP | F | CRGSLRRV.. |
| lcl Glyma.05G044700_154-201   | .MCIN.....  | CYSDG.....  | N.TRSES.....   |     | CP | L | CRGSIKS..  |
| lcl Glyma.11G246300_78-119    | .LCIS.....  | CFHDW.....  | Y.MRSES.....   |     | CP | F | CR.....    |
| lcl Glyma.18G010900_145-192   | .LCIS.....  | CFHDW.....  | Y.MRSES.....   |     | CP | F | CRGSLKRI.. |
| lcl Glyma.02G309100_117-162   | .LCLR.....  | CFEKK.....  | VGQK.RT.....   | CA  |    | N | CRAQI..    |
| lcl Glyma.14G003700_117-162   | .FCLR.....  | CFEKK.....  | IGQK.RT.....   | CA  |    | N | CRAQI..    |
| lcl Glyma.12G001300_129-175   | .FCLK.....  | CFEKK.....  | VRQK.RN.....   | CA  |    | K | CRQII..    |
| lcl Glyma.05G198100_138-187   | .FCNG.....  | CFSEW.....  | LRRSKERHS..... | AVL | CP | O | CRAVV..    |
| lcl Glyma.04G165900_213-256   | .FCCS.....  | CLFQS.....  | MDR.....       | GNK | CP | L | CR.....    |
| lcl Glyma.06G196600_193-236   | .FCRS.....  | CLFQS.....  | MDR.....       | GNR | CP | L | CR.....    |
| lcl Glyma.16G063400_170-217   | .FCRK.....  | CLRSA.....  | ADKC.....      | GKK | CP | K | CRQLIS..   |
| lcl Glyma.19G082000_171-218   | .FCRK.....  | CLRSA.....  | ADKC.....      | GKK | CP | K | CRQLIS..   |
| lcl Glyma.12G180800_764-813   | .LCRE.....  | CLLSS.....  | WRNAT.....     | SGL | CP | V | CRKTISR..  |
| lcl Glyma.13G320000_790-839   | .LCRE.....  | CLLSS.....  | WRNAT.....     | SGL | CP | V | CRKTISR..  |
| lcl Glyma.20G087900_859-904   | .FCRE.....  | CLFSC.....  | WGTSV.....     | GGK | CP | I | CRQ.....   |
| lcl Glyma.02G149800_290-333   | CCCTT.....  | CSSHLL..... | T.....         | NC  | CP | L | CRQIEKV..  |
| lcl Glyma.10G024100_292-330   | CCCTA.....  | CSSHLL..... | T.....         | NC  | CP | L | CRQI.....  |
| lcl Glyma.03G080300_332-382   | VCCQG.....  | CAISV.....  | EREVA.....     | PK  | CP | V | CRQEIRDS.. |
| lcl Glyma.16G008300_327-377   | VCCQG.....  | CAISV.....  | EREVA.....     | PK  | CP | V | CRQEIRDS.. |
| lcl Glyma.18G149800_331-381   | VCCQG.....  | CAISV.....  | EREVA.....     | PK  | CP | V | CRQEIRDS.. |
| lcl Glyma.04G043900_344-393   | ATCYD.....  | CAQRI.....  | LDEES.....     | IV  | CP | I | CRRLIHK..  |
| lcl Glyma.06G044100_357-407   | ATCYD.....  | CAERI.....  | VDGES.....     | KV  | CP | I | CRRLIHKV.. |
| lcl Glyma.07G150500_385-433   | VACFA.....  | CGTRI.....  | AEAAG.....     | T   | CP | V | CRNMKKV..  |
| lcl Glyma.18G201500_386-434   | VACFA.....  | CGTRI.....  | AEAAG.....     | T   | CP | V | CRNMKKV..  |
| lcl Glyma.10G181100_405-450   | AGCMS.....  | CLNEV.....  | KSKK.....      | WG  | CP | V | CRAKIDQV.. |
| lcl Glyma.20G209400_406-451   | AGCMS.....  | CLNEV.....  | KSKK.....      | WG  | CP | V | CRAKIDQV.. |
| lcl Glyma.03G180500_289-337   | CMCSG.....  | CAKDS.....  | RFQTD.....     | RCS |    | I | CRQPVER..  |
| lcl Glyma.19G181100_312-356   | CMCSG.....  | CAKVL.....  | RFQTD.....     | RCP |    | I | CRQPVER..  |
| lcl Glyma.10G052000_291-337   | CMCSG.....  | CAKVL.....  | RFQTN.....     | RCP |    | I | CRQPVER..  |
| lcl Glyma.13G139400_291-337   | CMCSG.....  | CAKVL.....  | RFQTN.....     | RCP |    | I | CRQPVER..  |
| lcl Glyma.13G326700_239-283   | CMCSG.....  | CANLL.....  | KVHTA.....     | NC  | CP | I | CRYPVER..  |
| lcl Glyma.07G257200_279-325   | CMCGD.....  | CAKAL.....  | RLQSN.....     | KCP |    | I | CRQPIEE..  |
| lcl Glyma.17G016900_219-265   | CMCGD.....  | CAKAL.....  | RPQSN.....     | KCL |    | I | CRQPIEE..  |
| lcl Glyma.13G208500_314-360   | CMCSE.....  | CANAH.....  | RLQSN.....     | KCP |    | I | CRQPIEE..  |
| lcl Glyma.15G104300_316-362   | CMCSE.....  | CANAL.....  | RQSN.....      | KCP |    | I | CRQPIEE..  |
| lcl Glyma.09G048200_866-915   | CTCLK.....  | CANEL.....  | QWNSG.....     | KCP |    | I | CRAKIVDV.. |
| lcl Glyma.15G155500_861-910   | CTCLK.....  | CANEL.....  | QWNSG.....     | KCP |    | I | CRAKIEDV.. |
| lcl Glyma.10G198600_793-842   | CTCSK.....  | CANEL.....  | IRGGG.....     | KCP |    | L | CRAPILEV.. |
| lcl Glyma.20G191400_792-841   | CTCSK.....  | CANEL.....  | IRGGG.....     | KCP |    | L | CRAPIVEV.. |
| lcl Glyma.11G191900_808-850   | CTCSK.....  | CANEL.....  | LQSRR.....     | KCP |    | M | COAPV..    |
| lcl Glyma.12G082400_798-847   | CTCSK.....  | CANEL.....  | LQSRR.....     | NC  | CP | M | COAPVVEV.. |
| lcl Glyma.12G179300_740-789   | CTCSK.....  | CANDL.....  | LQSRR.....     | KCP |    | M | COAPVVEV.. |
| lcl Glyma.13G321300_793-842   | CTCSK.....  | CANDL.....  | LQSRR.....     | KCP |    | M | COAPVVEV.. |
| lcl Glyma.13G212200_825-875   | VVCTT.....  | CNDLH.....  | EKQGM.....     | QD  | CP | S | CRSPIQRR.. |
| lcl Glyma.15G100500_827-877   | VVCTT.....  | CNELH.....  | EKQGM.....     | QD  | CP | S | CRSPIQRR.. |
| lcl Glyma.17G020500_819-869   | VVCTP.....  | CNELH.....  | EKQGM.....     | QD  | CP | S | CRSPIQRR.. |
| lcl Glyma.07G253800_821-871   | VVCKT.....  | CNELH.....  | EKQGM.....     | QD  | CP | S | CRSPIQRR.. |
| lcl Glyma.02G150400_776-826   | VVCPE.....  | CNELH.....  | EKQGM.....     | KE  | CP | S | CRAPIQRR.. |
| lcl Glyma.05G112600_659-709   | VMCAS.....  | CSDEY.....  | GRGKG.....     | AI  | CP | C | CRVQIQRR.. |
| lcl Glyma.17G154400_621-671   | VMCAS.....  | CSDEY.....  | GRGKG.....     | AT  | CP | C | CRVQIQRR.. |
| lcl Glyma.11G042600_620-669   | VMCAR.....  | CGKEY.....  | GKKGK.....     | AV  | CP | C | CRVPIEER.. |
| lcl Glyma.04G009100_1020-1065 | CLCKS.....  | CSLAC.....  |                | SE  | CP | I | CRTNITDR.. |
| lcl Glyma.06G009000_1020-1065 | CLCKS.....  | CSLAC.....  |                | SE  | CP | I | CRTSITDR.. |
| lcl Glyma.16G098500_18-63     | CLCKS.....  | CSLAC.....  |                | SE  | CP | I | CRTSITDR.. |
| lcl Glyma.07G159000_32-77     | CLCKS.....  | CSLAC.....  |                | FE  | GP | I | CRTSITDR.. |
| lcl Glyma.11G112700_1028-1064 | CLCKS.....  | CSLAC.....  |                | SE  | CP | L | CR.....    |
| lcl Glyma.12G038600_1038-1083 | CLCKS.....  | CSLAC.....  |                | SE  | CP | I | CRTNISDR.. |
| lcl Glyma.05G013200_415-460   | VLCST.....  | CSEQKR..... |                | KK  | CP | I | CRDSIAER.. |
| lcl Glyma.17G121200_415-460   | VLCST.....  | CSEKC.....  |                | KK  | CP | I | CRDSIAER.. |
| lcl Glyma.10G204900_433-478   | ILCST.....  | CCEKC.....  |                | KR  | CP | V | CRGPIEER.. |
| lcl Glyma.20G185600_422-467   | ILCST.....  | CCEKC.....  |                | KR  | CP | V | CRGPIEER.. |
| lcl Glyma.01G029500_286-325   | CLCKD.....  | CEGFI.....  |                | NV  | CP | V | CO.....    |
| lcl Glyma.02G035800_286-325   | CLCKD.....  | CEGFI.....  |                | NV  | CP | V | CO.....    |
| lcl Glyma.14G083900_301-342   | CLCKD.....  | CESKL.....  |                | SF  | CP | L | CQSS.....  |
| lcl Glyma.17G241100_292-333   | CLCKD.....  | CESKL.....  |                | SF  | CP | L | CQSS.....  |
| lcl Glyma.08G170400_204-247   | CLCTA.....  | CGSSL.....  |                | HI  | CP | I | CKSFKTAS.. |
| lcl Glyma.15G256500_288-331   | CLCTV.....  | CGSSL.....  |                | HI  | CP | I | CKSYKTAS.. |
| lcl Glyma.09G019900_261-297   | CLCTM.....  | CGSTV.....  |                | RN  | CP | I | CR.....    |
| lcl Glyma.15G126400_264-300   | CLCTM.....  | CGTTI.....  |                | RN  | CP | I | CR.....    |
| lcl Glyma.01G203300_274-316   | CICAE.....  | CDTHF.....  |                | RA  | CP | V | CLTVKNST.. |
| lcl Glyma.11G039700_281-323   | CICAE.....  | CDGHF.....  |                | RA  | CP | V | CLTVKNST.. |
| lcl Glyma.05G068400_302-344   | CVCTE.....  | CDAHF.....  |                | RA  | CP | V | CLTPKNST.. |
| lcl Glyma.17G150900_309-344   | CICTE.....  | CDAHF.....  |                | RA  | CP | V | CLTPKNST.. |
| lcl Glyma.09G282200_4713-4753 | .LCRR.....  | CSS.....    | AV.....        | SR  | CP | F | CRQLQVTK.. |
| lcl Glyma.20G003400_4712-4751 | .LCRR.....  | CSS.....    | AV.....        | SR  | CP | F | CRQLQVTK.. |
| lcl Glyma.04G220000_1217-1265 | .SCYR.....  | CITRH.....  | LL.NC.....     | QR  | CF | F | CNATVTDV.. |
| lcl Glyma.06G145900_1217-1265 | .SCYG.....  | CITRH.....  | LL.NC.....     | QR  | CF | F | CNATVTDV.. |

lcl|Glyma.08G358300\_319-375 .MCAH.....CTLAL.....CCHKK.LDPATTGLSGPVP...FCRGS I

lcl|Glyma.18G176600\_318-374 .MCAH.....CTLAL.....CCHKK.PDPATAGLSGPV...FCRGTI

lcl|Glyma.12G063600\_316-372 .MCAQ.....CTLAL.....CCHNK.PNPSTRVIPPV...FCRSSI

lcl|Glyma.11G140000\_316-372 .MCAQ.....CTLAL.....CCHNK.PNPSTRVIPPV...FCRSTI

lcl|Glyma.13G335300\_323-381 .MCAQ.....CTLAL.....CCHNK.PNPATACLTTPPV...FCRSTITR

lcl|Glyma.15G039100\_316-374 .MCAQ.....CTLAL.....CCHNK.PNPATACLTTPPV...FCRSTITR

lcl|Glyma.08G315500\_281-340 .MCAH.....CIMRL.....CQKKS.DIDAPRSSNSKPV...FCRGDIVR

lcl|Glyma.03G079200\_225-269 .FCRT.....CSREI.....WVSRG.....NCP...LNNLILEI

lcl|Glyma.16G094800\_214-258 .FCRM.....CSREI.....WVSRG.....NCP...LNNLILEI

lcl|Glyma.08G350900\_306-345 .FCRM.....CSREL.....MVSRG.....NCP...RCN

lcl|Glyma.18G165000\_306-353 .FCRM.....CSREL.....MVSRG.....NCP...LNNFILEI

lcl|Glyma.07G264100\_155-203 .FCRV.....CSREL.....WLNRG.....TCP...LNNRSILEI

lcl|Glyma.17G009900\_146-194 .FCRV.....CSREL.....WLNRG.....TCP...LNNRSILEI

lcl|Glyma.09G008200\_144-192 .FCRV.....CSREL.....WLNRG.....SCP...LNNRSILEI

lcl|Glyma.15G112600\_157-205 .FCRV.....CSREL.....WLNRG.....SCP...LNNRSILEI

lcl|Glyma.04G189900\_380-423 .TCCD.....CGQDL.....EL.....CP...ICRSTIDTR

lcl|Glyma.06G175700\_381-424 .TCCD.....CGQDL.....EL.....CP...ICRSTIDTR

lcl|Glyma.05G173500\_413-456 .TCCD.....CGENL.....EC.....CP...ICRSTITTR

lcl|Glyma.08G130800\_413-456 .TCCD.....CGENL.....EC.....CP...ICRSTITTR

lcl|Glyma.11G244000\_416-459 .TCCD.....CGEDL.....QF.....CP...ICRSTIHTR

lcl|Glyma.18G013100\_412-455 .TCCD.....CGEDL.....QF.....CP...ICRSTIHTR

lcl|Glyma.05G115700\_444-487 .TCCD.....CGQDL.....QS.....CP...ICRSPINTR

lcl|Glyma.19G051500\_449-492 .TCCD.....CGQDL.....QS.....CP...ICRSPINTR

lcl|Glyma.19G078600\_381-424 .TCCD.....CGQDL.....QS.....CP...MCRSPINTR

lcl|Glyma.19G124300\_227-270 .TCCD.....CGQDL.....QS.....CP...MYRSPINTI

lcl|Glyma.16G068400\_384-427 .TCCD.....CGQDL.....QS.....CP...MCRSPINAR

lcl|Glyma.04G211000\_388-427 .TCKE.....CGSTL.....SS.....CP...MCRHOITTR

lcl|Glyma.05G193500\_382-421 .TCKE.....CGVTL.....SS.....CP...MCRQBITTR

lcl|Glyma.08G234200\_376-419 .TCRD.....CGSRL.....TN.....CP...ICRORITNR

lcl|Glyma.15G219300\_368-411 .TCRD.....CGSRL.....TD.....CP...ICRORITNR

lcl|Glyma.10G238000\_315-375 .LCVR.....CALYL.....CSTNNVSSEMGLPFGSIP...LCRHGVVSF

lcl|Glyma.20G156600\_315-375 .LCVR.....CALYL.....CSTNNVSSEMVGPPGSIP...LCRHGVVSF

lcl|Glyma.09G143600\_314-374 .LCVR.....CALYL.....CSTNSVSETGGPPGSIP...LCRHGVVSF

lcl|Glyma.01G178600\_28-77 .FCWP.....CLYRW.....LHHSHSQE.....CP...VCKALVQE

lcl|Glyma.11G063500\_28-77 .FCWP.....CLYRW.....LHHSHSQE.....CP...VCKALVQE

lcl|Glyma.04G034500\_31-78 .FCWP.....CLYKW.....LHFHSQSRE.....CP...VCKALVEE

lcl|Glyma.06G034500\_29-78 .FCWP.....CLYKW.....LHFHSQSRE.....CP...VCKALVEE

lcl|Glyma.03G145700\_157-202 .FCWS.....CLYRW.....LHLHSDAKE.....CP...VCKGEVT

lcl|Glyma.19G148900\_156-201 .FCWP.....CLYRW.....LHLHSDAKE.....CP...VCKGEVT

lcl|Glyma.08G157200\_105-149 .FCWP.....CFHKL.....SYAYS DVRE.....CP...VCKGDV

lcl|Glyma.15G269000\_105-151 .FCWP.....CFHKL.....SYAYS DVRE.....CP...VCKGDVTE

lcl|Glyma.09G001100\_123-170 .FCWQ.....CFYQV.....QIVYSNARE.....CP...VCKGEVTET

lcl|Glyma.12G240800\_129-176 .FCWQ.....CFYQV.....QIVYSNARE.....CP...VCKGEVTET

lcl|Glyma.06G293400\_33-91 .YCWV.....CIYKW.....LHFQSTSLDDEEQQR.PQ...VCKSEVSQS

lcl|Glyma.12G112000\_36-91 .YCWV.....CIYKW.....LHFQSTSLDNEEQQR.PQ...VCKSEVSQS

lcl|Glyma.12G203900\_46-99 .YCWV.....CIYKW.....LNFLSASCENEKQ...QCP...VCKSEISQS

lcl|Glyma.13G297700\_44-94 .YCWV.....CIYKW.....LNLQATASSENEEKQ...QCP...VCK

lcl|Glyma.12G151200\_37-90 .YCWV.....CIYKW.....LDVQSSSVPEYQQQ...TCP...VCKSEISHT

lcl|Glyma.07G196000\_33-84 .YCWV.....CIYKW.....LHVQASLAPDEHP...QCP...VCKDDI

lcl|Glyma.13G179900\_30-81 .YCWV.....CIYKW.....LHVQASLAPDEHP...QCP...VCKDDI

lcl|Glyma.13G239500\_29-80 .YCWV.....CIYKW.....LHVQSDSLPDEHP...QCP...VCKADI

lcl|Glyma.15G073700\_29-80 .YCWV.....CIYKW.....LHVQSDSLAPDEHP...QCP...VCKADI

lcl|Glyma.14G099100\_339-384 .FCWN.....CITEW.....CNEKPE.....CP...LCRTPITHS

lcl|Glyma.17G225600\_339-384 .FCWN.....CITEW.....CNEKPE.....CP...LCRTPITHS

lcl|Glyma.01G074000\_824-869 .FCYS.....CIQ.....KVAGSRHR...KCP...QCCTS

lcl|Glyma.11G175700\_818-875 .FCYS.....CIQ.....KVAGSRHR...KCP...QCSTSGANDVK

lcl|Glyma.02G267300\_828-871 .FCNP.....CIQ.....RNLELRHR...KCP...ACGTAF

lcl|Glyma.14G050200\_828-871 .FCNP.....CIQ.....RNLELRHR...KCP...ACGTAF

lcl|Glyma.10G288200\_718-762 .FCYQ.....CVS.....EYLTGDDN...MCP.S.VNCKELI

lcl|Glyma.20G100800\_721-765 .FCYQ.....CVS.....EYLTGDDN...TCP.S.VNCKELI

lcl|Glyma.04G125600\_69-110 .FCKA.....CIS.....RFKD.....CP...LCGADIVKI

lcl|Glyma.06G313000\_69-110 .FCKA.....CIL.....RFKD.....CP...LCGADIVKI

lcl|Glyma.10G155500\_28-80 .FCFN.....CILRW.....TKVVAGKHRSPSSV...KCP...LCKTE

lcl|Glyma.20G232800\_26-78 .FCFN.....CILRW.....TKVVASKHRSPSSV...KCP...LCKTE

lcl|Glyma.04G255000\_11-57 .FCGN.....CIM.....LVWQHGSVGCSC...KCP...LCRRAI

lcl|Glyma.11G103800\_150-191 .FCKD.....CIKA.....AISAQG.....KCP...TCRKKV

lcl|Glyma.12G028700\_150-191 .FCKD.....CIKA.....AISAQG.....KCP...TCRKKV

lcl|Glyma.09G281300\_151-194 .FCKN.....CIRA.....AISAQA.....KCP...TCRKKVTK

lcl|Glyma.20G004500\_80-121 .FCKN.....CIRA.....ALSAQA.....KCP...TCRKV

lcl|Glyma.03G124900\_577-621 .FCRI.....CILR.....ALQNKPN...CP...LCRR

lcl|Glyma.03G214100\_219-270 .FCYI.....CACS.....AASVSVNGLKSADPKMK...CP...LCRE

lcl|Glyma.19G210900\_219-269 .FCYI.....CACS.....AASVSVNGLKSADPKMK...CP...LCR

lcl|Glyma.10G018800\_210-261 .FCYT.....CACS.....TASVIVDGLKAANPKK...CP...LCRE

lcl|Glyma.19G203000\_218-270 .FCKS.....CACS.....AASVMIFQGLKAASPESK...CP...ICREV

lcl|Glyma.08G153800\_209-269 .FCIS.....CIRNWRSS.NPTLGMVDN...STLRA...CP...ICRK

lcl|Glyma.15G272400\_209-269 .FCIS.....CIRNWRSS.NPTLGMVDN...STLRA...CP...ICRK

lcl|Glyma.08G154100\_188-251 .FCLS.....CIRNWRNSAAPTSGMDIGNAGTANTVRT...CP...V

lcl|Glyma.15G273000\_188-250 .FCLS.....CIRNWRNS.APTSGMDISNAGTANTVRT...CP...V

lcl|Glyma.10G151500\_34-80 .FHLD.....CIG.....SAFNIK.....GAMQ...CP...NCRK

lcl|Glyma.20G236700\_42-88 .FHLD.....CIG.....SAFNIK.....GAMQ...CP...NCRK

lcl|Glyma.19G232800\_18-67 .FHLD.....CIG.....SAFNIK.....GAMQ...CP...NCRK

lcl|Glyma.02G219200\_1354-1408 .TCCK.....CLFAMT.EKRLQNSKLNHW...VMCP...TCRQH

lcl|Glyma.14G186500\_414-466 .TCCK.....CLFAMT.EKRLQNNKLNHW...VMCP...TCRQHT

lcl|Glyma.06G290400\_82-126 .FCRE.....CIDKS.....MRLGNNE.....CP...ACRTHC

lcl|Glyma.12G116500\_60-104 .FCRE.....CIDKS.....MRLGNNE.....CP...ACRTHC

lcl|Glyma.12G205500\_121-165 .FCRE.....CIDKS.....MRLGNNE.....CP...ACRTHC

lcl|Glyma.13G295300\_124-168 .FCRE.....CIDKS.....MRLGNNE.....CP...ACRTHC

lcl|Glyma.08G350700\_40-90 .FCRD.....CIEKS.....FRLGNNE.....CP...ACRT

lcl|Glyma.13G177200\_138-181 .FCGK.....CIEKS.....MRLSNNE.....CP...VCRVHC

lcl|Glyma.02G267800\_40-81 .FCYM.....CIITH.....LRNKS.....DCP...CC

lcl|Glyma.14G049700\_46-87 .FCYM.....CIITH.....LRNKS.....DCP...CC

lcl|Glyma.02G141500\_20-65 .TFCRK.....CIYDKI.....TDEEL.....ENCP...VCNIDL

lcl|Glyma.10G032500\_19-64 .TFCRK.....CIYDKI.....ADEEL.....ENCP...VCNIDL

lcl|Glyma.03G159500\_34-79 .TFCRK.....CIYDKI.....TDEEI.....ECCP...ICNIDL

lcl|Glyma.19G161700\_18-63 .TFCRK.....CIYDKI.....TDEEI.....ECCP...ICNIDL

lcl|Glyma.10G162800\_19-64 .TFCRK.....CIYEKL.....SDEET.....DCP...VCNIDL

lcl|Glyma.20G225400\_20-65 .TFCRK.....CIYEKL.....SDEEM.....DCP...VCHIDL

lcl|Glyma.10G180300\_32-77 .SFCRE.....CVDKKL.....IDEKL.....KHC...CP...ICNRDL

lcl|Glyma.03G165600\_25-74 .LFCNS.....CLADCI.....TAG.....SECA...VCKITYAQTDVR

lcl|Glyma.19G166900\_24-66 .LFCNS.....CLADCI.....TAG.....PGCA...VCKA

lcl|Glyma.13G220400\_468-515 .LFCNS.....CIFKSM.....KSA.....SACP...VCKIPFTRR

lcl|Glyma.15G092000\_450-498 .LFCNS.....CIFKSM.....KSA.....SACP...VCKIPFTRR

lcl|Glyma.09G099300\_2-43 .LLCTD.....DANKIL.....SND.....GACP...ICDQ

|                               |                                   |    |            |
|-------------------------------|-----------------------------------|----|------------|
| lcl Glyma.15G209600_2-43      | LLCTD.....DANKIL.....SND.....GA   | CP | ICDQ       |
| lcl Glyma.10G149400_424-470   | FFCFA.....CIMewa.....KVE.....SR   | CP | LCKQRF     |
| lcl Glyma.20G238800_406-452   | FFCFA.....CIMewa.....KVE.....SR   | CP | LCKQRF     |
| lcl Glyma.17G082300_27-72     | HFCFV.....CIMewa.....KHE.....SR   | CP | ICRQRF     |
| lcl Glyma.19G042100_335-385   | RFCFP.....CIQNWADHTTSMRKT.....ST  | CP | LCKAS      |
| lcl Glyma.09G206500_285-320   | FFCLK.....CLOTFA.....QIH.....     |    |            |
| lcl Glyma.02G103300_678-724   | .FHSG.....CIKQWLM.....QKNL        | CP | ICKT       |
| lcl Glyma.07G214600_664-710   | .FHSG.....CIKQWLM.....QKNL        | CP | ICKT       |
| lcl Glyma.04G039700_603-649   | .FHSS.....CIKQWLM.....QKNL        | CP | ICKT       |
| lcl Glyma.04G039800_683-729   | .FHSS.....CIKQWLM.....HKNL        | CP | ICKT       |
| lcl Glyma.06G041000_657-703   | .FHSS.....CIKQWLM.....HKNL        | CP | ICKT       |
| lcl Glyma.05G241900_382-427   | .YHFQ.....CIKQWVA.....QKNF        | CP | VCKQVQ     |
| lcl Glyma.08G049400_328-373   | .YHFQ.....CIKQWAA.....QKNF        | CP | VCKQVQ     |
| lcl Glyma.07G097700_305-350   | .YHFQ.....CIKQWLV.....HKNF        | CP | VCKQEV     |
| lcl Glyma.09G180300_320-365   | .YHFQ.....CIKHVLE.....HKNF        | CP | VCKQEV     |
| lcl Glyma.14G134600_501-543   | .FHVV.....CIQEWLR.....HKNW        | CP | ICK        |
| lcl Glyma.17G198300_478-520   | .FHVV.....CIQEWLR.....LKNW        | CP | VCK        |
| lcl Glyma.06G076600_488-533   | .YHVA.....CIQWVLO.....LKNW        | CP | ICKASV     |
| lcl Glyma.03G179300_494-542   | .YHVS.....CIKKWLS.....LRKL        | CP | ICKVS      |
| lcl Glyma.19G180000_492-540   | .YHVS.....CIKKWLS.....MKKL        | CP | ICKVS      |
| lcl Glyma.10G051200_482-530   | .YHVG.....CIKRWLS.....MKKV        | CP | ICKAS      |
| lcl Glyma.13G138700_493-541   | .YHVG.....CIKRWLS.....MKKV        | CP | ICKVS      |
| lcl Glyma.06G229700_316-362   | .YHAD.....CLRRWLL.....EKNV        | CP | LCKS       |
| lcl Glyma.06G234500_258-302   | .YHAD.....CLRRWLL.....EKNV        | CP | MCKS       |
| lcl Glyma.11G156300_288-334   | .YHTD.....CLKKWLL.....EKNV        | CP | MCKS       |
| lcl Glyma.06G234300_402-449   | .YHAD.....CLKKWLL.....VKNV        | CP | VCKSE      |
| lcl Glyma.12G158500_402-449   | .YHAD.....CLKKWLL.....VKNV        | CP | ICKSE      |
| lcl Glyma.13G272700_474-517   | .YHAD.....CLRTWLV.....VKNV        | CP | ICKSE      |
| lcl Glyma.04G249100_149-193   | .YHSD.....CISKWLO.....IKKV        | CP | ICGNEV     |
| lcl Glyma.06G113900_130-174   | .YHSD.....CISKWLO.....IKKV        | CP | ICGNEV     |
| lcl Glyma.13G031100_152-196   | .YHTD.....CISKWLO.....IKKV        | CP | ICNTFI     |
| lcl Glyma.14G152800_154-198   | .YHTD.....CISKWLO.....IKKV        | CP | ICNIEI     |
| lcl Glyma.10G284900_291-328   | .YHPE.....CINNWLK.....INK         |    |            |
| lcl Glyma.20G104300_280-331   | .YHPE.....CINNWLK.....INKV        | CP | VCSSTVVSAS |
| lcl Glyma.11G132700_192-240   | .YHAS.....CGNKWLS.....INKA        | CP | ICYTEV     |
| lcl Glyma.12G057100_192-240   | .YHAS.....CGNKWLS.....INKA        | CP | ICYTEV     |
| lcl Glyma.12G237700_196-240   | .YHGE.....CITKWLS.....INKK        | CP | VCNTEV     |
| lcl Glyma.13G203300_196-240   | .YHGE.....CITKWLS.....INKK        | CP | VCNTEV     |
| lcl Glyma.03G184600_122-174   | .YGMS.....CIKKWLOH.....RRNSNK     | CP | QCKVK      |
| lcl Glyma.14G147100_225-268   | .YCSE.....CILRWLD.....NNKT        | CP | VCR        |
| lcl Glyma.01G219800_243-291   | .WHTY.....CLSPPLEH.....IP.PG      |    | CLNS       |
| lcl Glyma.11G023700_243-291   | .WHTY.....CLSPPLEK.....IP.PG      |    | CLNS       |
| lcl Glyma.13G170000_1273-1321 | .YHTY.....CLNPPLAR.....IP.EG      |    | CVVG       |
| lcl Glyma.19G010200_1251-1297 | .YHTY.....CLNPPLAR.....IP.EG      |    | CVV        |
| lcl Glyma.02G013500_1244-1297 | .THID.....CCDPLTA.....VP.EE       |    | DWFCPK     |
| lcl Glyma.10G014100_1243-1296 | .THID.....CCDPLTH.....VP.EE       |    | DWFCPK     |
| lcl Glyma.02G295400_391-439   | .FHLK.....CLQPSVLRG.....IHN.RV    |    | DWHCMR     |
| lcl Glyma.14G018000_392-439   | .FHLK.....CLQPSVLRG.....IHN.RV    |    | DWHCMR     |
| lcl Glyma.09G059700_234-289   | .FHQR.....CLNPPLDTEN.....IPPGDQ   |    | GWFCKF     |
| lcl Glyma.15G166200_251-303   | .FHQR.....CLNPPLDTEN.....IPPGDQ   |    | GWFCKF     |
| lcl Glyma.17G059400_224-279   | .FHQK.....CLDPPLDTEN.....IPPGEQ   |    | GWFCKF     |
| lcl Glyma.10G260400_343-398   | .FHQL.....CLDPPMLTED.....IPPGDE   |    | GWFCPG     |
| lcl Glyma.20G130800_344-399   | .FHQL.....CLDPPMLTED.....IPPGDE   |    | GWFCPG     |
| lcl Glyma.01G234300_253-300   | .AEHTY.....CMREMLEK.....VPEGD     |    | WLCBE      |
| lcl Glyma.11G008600_251-297   | .AEHTY.....CMREMLEK.....VPEGD     |    | WLCBE      |
| lcl Glyma.12G014900_273-322   | .AEHTY.....CMREMLEK.....VPEGD     |    | WLCBE      |
| lcl Glyma.11G109800_273-322   | .AEHTY.....CMREMLEK.....VPEGD     |    | WLCBE      |
| lcl Glyma.17G155700_20-68     | .AEHIY.....CMRDKLEK.....VPDGDW    |    | WTCED      |
| lcl Glyma.04G163100_13-61     | .CEHSY.....CMRFN.....TLIVP        |    | IDWICEP    |
| lcl Glyma.11G043500_25-80     | .AEHTY.....CLMDPDEQS.....KLEAKPEL |    | RKDWTCED   |
| lcl Glyma.06G230000_305-354   | .ARHRY.....CLDGP.....VIFTD        |    | DVTWFCED   |
| lcl Glyma.09G125400_373-422   | .ALHRY.....CLDGP.....VIFTD        |    | DVTWFCED   |
| lcl Glyma.10G227100_4-50      | .ALHRY.....CLKGP.....VVFTD        |    | AVTWFCED   |
| lcl Glyma.20G165200_4-53      | .ALHRY.....CLKGP.....VIFTD        |    | AVTWFCED   |
| lcl Glyma.04G214800_25-74     | .AEHSY.....CLDKF.....HTEDDG       |    | TLIWRCD    |
| lcl Glyma.04G062400_53-97     | .YHPR.....CLLPLK.....GPLPD        |    | NWRCE      |
| lcl Glyma.06G063400_53-97     | .YHPK.....CLLPLK.....GPLPD        |    | NWRCE      |
| lcl Glyma.12G170900_115-166   | .QHIN.....CVIIEKPMGDGIPVDP        |    | KFYCEI     |
| lcl Glyma.13G328100_115-166   | .QHIS.....CVIIEKPMGDGIPVDP        |    | KFYCEI     |
| lcl Glyma.12G071300_116-167   | .QHIS.....CVIIEKPTGEGILVDP        |    | KFYCEL     |
| lcl Glyma.04G253800_296-345   | .VHRK.....CYG.VHDD.....IDE        |    | AWLCSW     |
| lcl Glyma.06G108500_295-345   | .VHRK.....CYG.VYDD.....VDG        |    | TWMSW      |
| lcl Glyma.15G219200_660-708   | .VHST.....CLMPPIGDI.....VPE       |    | EWSCHL     |
| lcl Glyma.01G238300_516-558   | .FHQS.....CLD.....I.QMLP          |    | PGEWH      |
| lcl Glyma.11G005500_722-764   | .FHQS.....CLD.....I.QMLP          |    | PGEWH      |
| lcl Glyma.01G238200_728-770   | .FHQS.....CLD.....I.QMLP          |    | LGEWH      |
| lcl Glyma.11G005300_720-760   | .FHQS.....CLD.....I.QMLP          |    | PGEWH      |
| lcl Glyma.02G146500_568-610   | .FHQG.....CLD.....I.KKFP          |    | SGDWH      |
| lcl Glyma.03G155500_313-355   | .FHQS.....CLD.....I.QTLP          |    | SGDWN      |
| lcl Glyma.10G044200_547-587   | .FHAA.....CLG.....L.QCVP          |    | DSGWCLN    |
| lcl Glyma.13G131800_545-585   | .FHAA.....CLG.....L.QCVP          |    | DSGWCLN    |
| lcl Glyma.06G046500_300-343   | .FHLS.....CLG.....L.EHVP          |    | DGDWFC     |
| lcl Glyma.11G170900_521-564   | .FHKT.....CLG.....L.EDIP          |    | NGDWF      |
| lcl Glyma.03G181800_43-91     | .YHPS.....CIVDP.....PL.NYIP       |    | LGFWH      |
| lcl Glyma.11G074400_81-126    | .YHPS.....CIVKR.....DE.AFFRS      |    | KAKWN      |
| lcl Glyma.13G320100_386-430   | .YHRS.....CIVG.....MK.MHIP        |    | EGAWY      |
| lcl Glyma.02G296200_232-286   | .RENS.....CIVSL.....GFTQKEVDE     |    | IQSFY      |
| lcl Glyma.18G086000_229-283   | .EEST.....CASL.....GFSRKEVDE      |    | IQNFY      |
| lcl Glyma.13G197800_36-86     | .VHAT.....CLAT.....GP.KFDG        |    | SGNF       |
| lcl Glyma.15G236400_75-123    | .VHAT.....CLGF.....EP.EFDD        |    | SGNF       |
| lcl Glyma.13G057300_662-708   | .FHAD.....CLGI.....KEH.EVSS       |    | RKWS       |
| lcl Glyma.19G029100_661-707   | .FHAD.....CLGI.....KEH.EVSS       |    | RKWS       |
| lcl Glyma.02G227900_820-872   | .YHVG.....CLKD.....REKYESRIY      |    | MKNWL      |
| lcl Glyma.14G194800_734-787   | .YHVE.....CLKD.....REKSESRIY      |    | MKNWL      |
| lcl Glyma.11G171200_781-832   | .YHVR.....CLEN.....GAADISTRY      |    | LGNWF      |
| lcl Glyma.10G062700_503-554   | .YHVG.....CLRDHKMAYLKELP          |    | EGDWF      |
| lcl Glyma.13G147100_501-557   | .YHVG.....CLRDHKMAYLKELP          |    | EGDWF      |
| lcl Glyma.02G058300_166-214   | .YHGK.....CIMMPTK.....GETLKH      |    | YK         |
| lcl Glyma.06G319800_166-214   | .YHGK.....CIMMPTK.....AETLKH      |    | YK         |
| lcl Glyma.07G271400_198-247   | .FHGK.....CVKITPAK.....AEHIKQ     |    | YK         |
| lcl Glyma.17G002600_199-248   | .FHGK.....CVKITPAK.....AEHIKQ     |    | YK         |
| lcl Glyma.11G190000_1281-1329 | .YHAE.....AVELEESK.....ISSVLG     |    | FKCSK      |
| lcl Glyma.12G084300_1287-1335 | .YHAE.....AVELEESK.....ISSVLG     |    | FKCSK      |

1c1|Glyma.12G180700\_1293-1341 .YHAE.....AVELEESK....LFDVLG.....FKCCK...CR.....  
 1c1|Glyma.07G056000\_373-427 .VHAE.....CDKISSKV....FKDLENT.....DYYCFD...CKGK.....  
 1c1|Glyma.16G024900\_371-425 .VHAE.....CDKISSKL....FKDLENT.....DYYCFD...CKGK.....  
 1c1|Glyma.03G215600\_371-425 .VHAE.....CDKISSKH....FKDLENT.....DYYCFD...CKGK.....  
 1c1|Glyma.19G212100\_374-428 .VHAE.....CDKISSKL....FKDLENA.....DYYCFD...CKGK.....  
 1c1|Glyma.04G236500\_434-488 .VHAE.....CDKICSNL....FKNLEGT.....DYYCPT...CKAK.....  
 1c1|Glyma.06G127800\_441-495 .VHAE.....CDKISSNL....FKNLEGT.....DYYCPT...CKAK.....  
 1c1|Glyma.19G066800\_376-430 .VHAE.....CDKISSNL....FKNLGGG.....DYFCPT...CKIK.....  
 1c1|Glyma.01G179800\_176-228 VWHPE.....FCCHACH.....LPITDYEFSSNNRPYHKAC.....  
 1c1|Glyma.11G062400\_192-244 VWHPE.....FCCHACH.....LPITDYEFSSNNRPYHKAC.....  
 1c1|Glyma.02G059900\_158-214 YWHPE.....FCCHACK.....LPITDYEFSSGNRRYHKSCYKELH.....  
 1c1|Glyma.16G142700\_157-213 YWHPE.....FCCHACK.....LPITDYEFSSGNRRYHKSCYKELH.....  
 1c1|Glyma.12G160000\_164-201 YWHPE.....FCCHACK.....LPITD.....  
 1c1|Glyma.14G077800\_125-177 FWHPE.....FCRCRACN.....LPISDYEFSTGNYPYHKSC.....  
 1c1|Glyma.17G247700\_120-172 FWHPE.....FCRCRACN.....LPISDYEFSTGNYPYHKSC.....  
 1c1|Glyma.02G251800\_176-228 YFHPN.....FCRCHSCG.....YPIITEREFSLGKHPYHKSC.....  
 1c1|Glyma.14G065000\_141-193 YFHPN.....FCRCHSCG.....YPIITEREFSLGKHPYHKSC.....  
 1c1|Glyma.02G253700\_47-99 AYHKA.....CFKCSHCE.....GTLKLSNYSSMEGVLYCKPHNEQLF.....  
 1c1|Glyma.18G030900\_10-66 AYHKA.....CFRCSHCK.....GTLKLSNYSSMEGVLYCKPHNEQLF.....  
 1c1|Glyma.05G205800\_10-66 AYHKN.....CFRCSHCN.....GLLAISNYSSTEGVLYCKVHFEQLF.....  
 1c1|Glyma.08G012700\_10-66 AYHKN.....CFRCSHCN.....GLLAISNYSSTEGVLYCKVHFEQLF.....  
 1c1|Glyma.03G013900\_10-66 TYHKN.....CFKCSHCK.....GCLTMSTYSSMDGILYCKTHFEQLF.....  
 1c1|Glyma.07G073600\_10-66 PYHKN.....CFKCSHCK.....GCLTMCTYSSMDGILYCKTHFEQLF.....  
 1c1|Glyma.09G261800\_10-66 PYHKN.....CFRCSHCK.....GCLTMSTYSSMDGVLYCKPHFEQLF.....  
 1c1|Glyma.18G230400\_10-66 PYHKN.....CFRCSHCK.....GYLTMNTYSSMDGVLYCKPHFEQLF.....  
 1c1|Glyma.04G179800\_24-80 IYHKS.....CFRCYHCK.....GTLKLSNYCSSFEGVLYCKPHFDQLF.....  
 1c1|Glyma.05G034700\_11-67 VYHKS.....CFRCHHCK.....GTLKLSNYCSSFEGVLYCKPHFHQLF.....  
 1c1|Glyma.10G114300\_10-49 IYHKS.....CFRCYHCK.....GTLKNT.....P.....  
 1c1|Glyma.20G085200\_10-49 IYHKS.....CFRCYHCK.....GTLKNN.....P.....  
 1c1|Glyma.04G046200\_109-164 PYHKS.....CFKCTHGG.....CVISPSNYIAHEGKLYCKHHHIQL.....  
 1c1|Glyma.06G047000\_109-164 PYHKS.....CFKCTHGG.....CVISPSNYIAHEGKLYCKHHHVQL.....  
 1c1|Glyma.17G234700\_109-164 PYHKS.....CFKCHGG.....CVISPSNYIAHEGKLYCKHHHVQL.....  
 1c1|Glyma.10G256600\_111-167 PYHKG.....CFKCTYGG.....CTVSSNFITHEGKLYCKHHHIQLF.....  
 1c1|Glyma.06G185000\_110-162 SYHKA.....CFRCTHGG.....CVISPSNYVAHEHRLYCRHH.....  
 1c1|Glyma.17G092600\_110-166 SYHKS.....CFRCTHGG.....CVISPSNYVAHEHRLYCRHHHTQLF.....  
 1c1|Glyma.11G226400\_108-164 AYHKS.....CFKCSHGG.....CPIITPSNYAALEGVLYCKHHFSQLF.....  
 1c1|Glyma.14G062700\_108-164 AYHKS.....CFKCSHGS.....CPIITPSNYAALEGVLYCKHHFSQLF.....  
 1c1|Glyma.14G112700\_1508-1555 LIRVH....QACYGVSSLPK.....KSSWC...P...CR.....  
 1c1|Glyma.13G253900\_326-371 .LCKQ.....SIMKLSKNS.....TRTFKCP...Y...C.....  
 1c1|Glyma.13G273500\_171-204 .YEKK.....VIMQYLKS.....KQHQCP...I.....



Human\_c-Cbl

Human\_c-Cbl  
consensus  
lcl|Glyma.09G103000\_21-70  
lcl|Glyma.15G275000\_20-69  
lcl|Glyma.04G067900\_40-89  
lcl|Glyma.06G069600\_30-98  
lcl|Glyma.13G202500\_20-69  
lcl|Glyma.02G080900\_38-87  
lcl|Glyma.16G165900\_30-96  
lcl|Glyma.05G187300\_39-88  
lcl|Glyma.08G145600\_39-88  
lcl|Glyma.10G223500\_41-90  
lcl|Glyma.02G205800\_37-86  
lcl|Glyma.17G072200\_27-95  
lcl|Glyma.04G153700\_37-86  
lcl|Glyma.06G225500\_37-86  
lcl|Glyma.04G142700\_37-86  
lcl|Glyma.06G225400\_46-117  
lcl|Glyma.06G316800\_40-89  
lcl|Glyma.09G051100\_38-87  
lcl|Glyma.15G157100\_38-87  
lcl|Glyma.08G088400\_32-81  
lcl|Glyma.08G302500\_39-88  
lcl|Glyma.18G117100\_39-88  
lcl|Glyma.04G063800\_9-58  
lcl|Glyma.06G065000\_6-58  
lcl|Glyma.05G160000\_385-436  
lcl|Glyma.08G117500\_6-58  
lcl|Glyma.12G017600\_131-178  
lcl|Glyma.02G090900\_13-60  
lcl|Glyma.18G292200\_14-61  
lcl|Glyma.18G242400\_64-112  
lcl|Glyma.02G103800\_77-125  
lcl|Glyma.07G215200\_80-128  
lcl|Glyma.13G372600\_71-120  
lcl|Glyma.15G001100\_69-118  
lcl|Glyma.11G236400\_33-82  
lcl|Glyma.18G020800\_33-82  
lcl|Glyma.05G182200\_29-78  
lcl|Glyma.05G010700\_54-89  
lcl|Glyma.17G118400\_55-107  
lcl|Glyma.02G310000\_267-316  
lcl|Glyma.14G002700\_268-317  
lcl|Glyma.03G180200\_231-280  
lcl|Glyma.19G180900\_243-292  
lcl|Glyma.13G005300\_253-302  
lcl|Glyma.20G064600\_253-302  
lcl|Glyma.11G147100\_266-315  
lcl|Glyma.12G068000\_266-315  
lcl|Glyma.12G173300\_234-283  
lcl|Glyma.13G326500\_259-308  
lcl|Glyma.10G051800\_240-289  
lcl|Glyma.13G139200\_260-309  
lcl|Glyma.13G213600\_217-265  
lcl|Glyma.15G099100\_214-262  
lcl|Glyma.01G107700\_99-151  
lcl|Glyma.U027600\_104-157  
lcl|Glyma.07G142300\_108-159  
lcl|Glyma.02G253000\_84-135  
lcl|Glyma.14G063500\_84-135  
lcl|Glyma.13G227900\_172-233  
lcl|Glyma.15G084600\_183-244  
lcl|Glyma.04G063700\_161-222  
lcl|Glyma.06G064900\_158-219  
lcl|Glyma.05G159600\_181-243  
lcl|Glyma.04G084500\_138-184  
lcl|Glyma.06G086100\_152-198  
lcl|Glyma.02G232900\_1829-1880  
lcl|Glyma.01G095300\_99-145  
lcl|Glyma.08G270800\_99-145  
lcl|Glyma.01G017200\_110-156  
lcl|Glyma.02G210700\_138-184  
lcl|Glyma.14G178400\_137-183  
lcl|Glyma.04G098100\_128-174  
lcl|Glyma.06G099800\_131-177  
lcl|Glyma.10G156500\_116-162  
lcl|Glyma.20G231900\_117-163  
lcl|Glyma.19G236800\_118-164  
lcl|Glyma.03G239900\_110-156  
lcl|Glyma.09G140700\_126-172  
lcl|Glyma.16G194600\_116-162  
lcl|Glyma.09G140800\_108-154  
lcl|Glyma.11G242800\_110-156  
lcl|Glyma.14G037000\_80-126  
lcl|Glyma.06G118400\_62-106  
lcl|Glyma.01G017300\_141-187  
lcl|Glyma.09G205600\_131-177  
lcl|Glyma.01G095600\_140-186  
lcl|Glyma.08G271100\_141-187  
lcl|Glyma.04G128100\_143-189  
lcl|Glyma.06G310600\_135-181  
lcl|Glyma.02G210400\_152-198  
lcl|Glyma.14G177900\_153-199  
lcl|Glyma.08G070100\_155-204  
lcl|Glyma.13G042300\_156-201  
lcl|Glyma.08G177000\_180-226  
lcl|Glyma.15G056000\_166-212  
lcl|Glyma.05G175400\_149-200  
lcl|Glyma.18G014500\_194-240  
lcl|Glyma.18G014600\_153-202  
lcl|Glyma.11G242500\_156-205  
lcl|Glyma.11G122400\_135-179  
lcl|Glyma.12G047300\_133-176

lcl|Glyma.01G032200\_147-191 .....  
lcl|Glyma.02G033200\_149-193 .....  
lcl|Glyma.13G071600\_172-216 .....  
lcl|Glyma.19G011200\_168-212 .....  
lcl|Glyma.08G289200\_148-194 .....  
lcl|Glyma.18G135300\_149-195 .....  
lcl|Glyma.05G035800\_139-185 .....  
lcl|Glyma.17G091600\_134-180 .....  
lcl|Glyma.13G092000\_129-175 .....  
lcl|Glyma.17G068300\_125-171 .....  
lcl|Glyma.03G103800\_137-183 .....  
lcl|Glyma.07G120300\_138-184 .....  
lcl|Glyma.15G183300\_121-167 .....  
lcl|Glyma.01G146500\_110-156 .....  
lcl|Glyma.09G194100\_115-161 .....  
lcl|Glyma.04G083400\_113-140 .....  
lcl|Glyma.06G084800\_126-176 .....  
lcl|Glyma.14G146700\_132-182 .....  
lcl|Glyma.02G106400\_97-139 .....  
lcl|Glyma.04G091400\_117-163 .....  
lcl|Glyma.03G215500\_93-139 .....  
lcl|Glyma.19G212000\_90-136 .....  
lcl|Glyma.02G016800\_86-132 .....  
lcl|Glyma.07G046400\_108-154 .....  
lcl|Glyma.16G014600\_107-153 .....  
lcl|Glyma.03G263000\_99-148 .....  
lcl|Glyma.07G245400\_93-139 .....  
lcl|Glyma.17G028400\_95-141 .....  
lcl|Glyma.09G042400\_118-164 .....  
lcl|Glyma.13G332800\_88-134 .....  
lcl|Glyma.06G284600\_119-165 .....  
lcl|Glyma.12G121400\_124-171 .....  
lcl|Glyma.12G208600\_102-147 .....  
lcl|Glyma.13G292600\_94-142 .....  
lcl|Glyma.09G214600\_99-144 .....  
lcl|Glyma.16G075300\_86-130 .....  
lcl|Glyma.13G108500\_112-158 .....  
lcl|Glyma.17G050900\_108-154 .....  
lcl|Glyma.18G176200\_157-203 .....  
lcl|Glyma.02G228800\_114-163 .....  
lcl|Glyma.01G157400\_104-150 .....  
lcl|Glyma.11G087600\_104-150 .....  
lcl|Glyma.04G015200\_96-142 .....  
lcl|Glyma.06G015200\_96-142 .....  
lcl|Glyma.09G196700\_100-146 .....  
lcl|Glyma.16G112200\_99-145 .....  
lcl|Glyma.04G215600\_139-185 .....  
lcl|Glyma.06G150400\_141-187 .....  
lcl|Glyma.05G188900\_144-190 .....  
lcl|Glyma.08G146600\_143-189 .....  
lcl|Glyma.09G275300\_113-159 .....  
lcl|Glyma.18G214200\_108-154 .....  
lcl|Glyma.07G173600\_79-113 .....  
lcl|Glyma.06G143100\_111-157 .....  
lcl|Glyma.08G088100\_109-152 .....  
lcl|Glyma.15G157400\_108-152 .....  
lcl|Glyma.04G182100\_194-239 .....  
lcl|Glyma.06G183300\_233-278 .....  
lcl|Glyma.05G037000\_234-279 .....  
lcl|Glyma.17G090200\_234-279 .....  
lcl|Glyma.11G191800\_129-174 .....  
lcl|Glyma.01G151700\_511-557 .....  
lcl|Glyma.09G216900\_511-557 .....  
lcl|Glyma.16G076000\_519-565 .....  
lcl|Glyma.16G107700\_522-568 .....  
lcl|Glyma.13G165500\_478-524 .....  
lcl|Glyma.17G105500\_479-525 .....  
lcl|Glyma.01G217300\_329-374 .....  
lcl|Glyma.11G026000\_332-377 .....  
lcl|Glyma.05G048800\_325-370 .....  
lcl|Glyma.17G130700\_323-368 .....  
lcl|Glyma.09G265600\_314-359 .....  
lcl|Glyma.18G225500\_320-365 .....  
lcl|Glyma.02G085200\_305-350 .....  
lcl|Glyma.07G170200\_304-349 .....  
lcl|Glyma.05G238900\_292-337 .....  
lcl|Glyma.08G046000\_293-338 .....  
lcl|Glyma.03G120200\_273-318 .....  
lcl|Glyma.19G124800\_275-320 .....  
lcl|Glyma.02G302400\_289-335 .....  
lcl|Glyma.14G011800\_289-335 .....  
lcl|Glyma.08G332300\_279-325 .....  
lcl|Glyma.18G074600\_278-324 .....  
lcl|Glyma.13G361000\_365-409 .....  
lcl|Glyma.15G012900\_392-436 .....  
lcl|Glyma.14G129100\_343-387 .....  
lcl|Glyma.17G203800\_375-419 .....  
lcl|Glyma.01G162900\_187-232 .....  
lcl|Glyma.11G080500\_187-232 .....  
lcl|Glyma.02G044300\_186-231 .....  
lcl|Glyma.04G143800\_84-127 .....  
lcl|Glyma.08G316400\_182-225 .....  
lcl|Glyma.18G096600\_201-244 .....  
lcl|Glyma.02G291200\_187-233 .....  
lcl|Glyma.05G025200\_170-216 .....  
lcl|Glyma.17G101800\_167-213 .....  
lcl|Glyma.10G124600\_688-735 .....  
lcl|Glyma.20G076700\_718-765 .....  
lcl|Glyma.10G217500\_232-277 .....  
lcl|Glyma.20G174500\_247-292 .....  
lcl|Glyma.11G137400\_208-259 .....  
lcl|Glyma.12G060800\_236-287 .....  
lcl|Glyma.11G220200\_212-254 .....

lcl|Glyma.18G037200\_212-254 .....  
lcl|Glyma.02G194400\_103-147 .....  
lcl|Glyma.10G083100\_103-147 .....  
lcl|Glyma.03G203400\_104-149 .....  
lcl|Glyma.10G121100\_107-150 .....  
lcl|Glyma.10G121500\_113-160 .....  
lcl|Glyma.03G017500\_84-127 .....  
lcl|Glyma.07G078800\_84-127 .....  
lcl|Glyma.09G264300\_89-135 .....  
lcl|Glyma.18G227700\_89-135 .....  
lcl|Glyma.10G202500\_86-132 .....  
lcl|Glyma.20G187900\_86-132 .....  
lcl|Glyma.09G001600\_110-156 .....  
lcl|Glyma.05G217000\_334-378 .....  
lcl|Glyma.08G022900\_332-375 .....  
lcl|Glyma.07G056200\_314-357 .....  
lcl|Glyma.16G025100\_320-363 .....  
lcl|Glyma.19G255700\_319-362 .....  
lcl|Glyma.06G127300\_326-371 .....  
lcl|Glyma.07G062800\_119-162 .....  
lcl|Glyma.16G030900\_115-158 .....  
lcl|Glyma.09G253500\_112-155 .....  
lcl|Glyma.18G239400\_89-132 .....  
lcl|Glyma.09G253400\_107-153 .....  
lcl|Glyma.02G264800\_105-151 .....  
lcl|Glyma.14G058000\_100-146 .....  
lcl|Glyma.11G231400\_107-153 .....  
lcl|Glyma.18G025700\_107-153 .....  
lcl|Glyma.11G169500\_92-138 .....  
lcl|Glyma.18G060400\_108-154 .....  
lcl|Glyma.01G093800\_57-96 .....  
lcl|Glyma.04G153400\_57-104 .....  
lcl|Glyma.04G153500\_74-120 .....  
lcl|Glyma.13G115900\_83-134 .....  
lcl|Glyma.17G043900\_85-135 .....  
lcl|Glyma.01G221300\_81-127 .....  
lcl|Glyma.11G022400\_87-133 .....  
lcl|Glyma.05G210000\_86-133 .....  
lcl|Glyma.08G016700\_85-132 .....  
lcl|Glyma.17G159400\_72-117 .....  
lcl|Glyma.02G223600\_99-145 .....  
lcl|Glyma.14G190300\_98-144 .....  
lcl|Glyma.13G009100\_96-142 .....  
lcl|Glyma.05G182000\_68-114 .....  
lcl|Glyma.08G139700\_68-114 .....  
lcl|Glyma.11G236600\_73-119 .....  
lcl|Glyma.18G020400\_70-116 .....  
lcl|Glyma.05G218700\_107-152 .....  
lcl|Glyma.08G024800\_108-153 .....  
lcl|Glyma.13G002800\_104-153 .....  
lcl|Glyma.20G066300\_104-153 .....  
lcl|Glyma.10G007200\_117-163 .....  
lcl|Glyma.20G088900\_139-185 .....  
lcl|Glyma.10G187100\_136-182 .....  
lcl|Glyma.20G203400\_135-181 .....  
lcl|Glyma.19G163600\_128-173 .....  
lcl|Glyma.11G243400\_93-139 .....  
lcl|Glyma.18G013800\_88-132 .....  
lcl|Glyma.13G232800\_104-150 .....  
lcl|Glyma.13G232800\_105-147 .....  
lcl|Glyma.15G079900\_101-151 .....  
lcl|Glyma.04G021200\_74-120 .....  
lcl|Glyma.06G021400\_73-119 .....  
lcl|Glyma.14G221800\_70-116 .....  
lcl|Glyma.17G260700\_70-116 .....  
lcl|Glyma.04G181300\_83-127 .....  
lcl|Glyma.06G183600\_83-127 .....  
lcl|Glyma.13G170300\_69-114 .....  
lcl|Glyma.19G010400\_71-116 .....  
lcl|Glyma.13G092100\_125-170 .....  
lcl|Glyma.17G068200\_100-145 .....  
lcl|Glyma.10G244900\_121-165 .....  
lcl|Glyma.20G149700\_120-164 .....  
lcl|Glyma.01G048700\_113-166 .....  
lcl|Glyma.02G108300\_190-234 .....  
lcl|Glyma.02G071200\_226-269 .....  
lcl|Glyma.16G152400\_225-267 .....  
lcl|Glyma.18G000200\_236-278 .....  
lcl|Glyma.02G161600\_186-230 .....  
lcl|Glyma.10G101400\_186-230 .....  
lcl|Glyma.02G276700\_252-296 .....  
lcl|Glyma.14G039000\_202-246 .....  
lcl|Glyma.13G072800\_206-250 .....  
lcl|Glyma.13G072900\_126-169 .....  
lcl|Glyma.04G251600\_220-265 .....  
lcl|Glyma.08G185400\_202-246 .....  
lcl|Glyma.15G047300\_199-243 .....  
lcl|Glyma.09G165200\_203-248 .....  
lcl|Glyma.16G213500\_202-247 .....  
lcl|Glyma.10G285300\_179-224 .....  
lcl|Glyma.20G103700\_178-223 .....  
lcl|Glyma.02G249100\_188-232 .....  
lcl|Glyma.14G067300\_187-231 .....  
lcl|Glyma.11G220400\_185-229 .....  
lcl|Glyma.18G037000\_174-209 .....  
lcl|Glyma.07G134600\_158-202 .....  
lcl|Glyma.18G184200\_159-203 .....  
lcl|Glyma.11G137300\_184-228 .....  
lcl|Glyma.12G060700\_182-226 .....  
lcl|Glyma.13G338400\_153-197 .....  
lcl|Glyma.15G036100\_152-197 .....  
lcl|Glyma.10G286700\_262-306 .....  
lcl|Glyma.20G102400\_259-303 .....

|                               |       |
|-------------------------------|-------|
| lcl Glyma.05G017500_280-324   | ..... |
| lcl Glyma.09G271200_369-413   | ..... |
| lcl Glyma.18G218200_373-417   | ..... |
| lcl Glyma.08G158300_95-136    | ..... |
| lcl Glyma.15G268100_109-150   | ..... |
| lcl Glyma.08G034000_52-100    | ..... |
| lcl Glyma.06G272400_167-215   | ..... |
| lcl Glyma.12G131800_171-215   | ..... |
| lcl Glyma.06G274300_168-216   | ..... |
| lcl Glyma.17G213300_14-59     | ..... |
| lcl Glyma.18G103300_98-136    | ..... |
| lcl Glyma.12G223700_140-184   | ..... |
| lcl Glyma.13G277600_139-186   | ..... |
| lcl Glyma.12G151700_161-205   | ..... |
| lcl Glyma.13G211100_115-163   | ..... |
| lcl Glyma.17G211800_21-68     | ..... |
| lcl Glyma.10G047200_194-237   | ..... |
| lcl Glyma.13G135100_190-233   | ..... |
| lcl Glyma.08G148600_91-141    | ..... |
| lcl Glyma.12G223800_101-147   | ..... |
| lcl Glyma.09G096300_141-186   | ..... |
| lcl Glyma.15G201800_154-199   | ..... |
| lcl Glyma.10G259300_189-234   | ..... |
| lcl Glyma.20G131600_187-232   | ..... |
| lcl Glyma.17G172100_265-310   | ..... |
| lcl Glyma.17G172200_262-307   | ..... |
| lcl Glyma.03G110700_123-171   | ..... |
| lcl Glyma.10G289100_82-127    | ..... |
| lcl Glyma.20G099800_77-122    | ..... |
| lcl Glyma.16G006200_74-120    | ..... |
| lcl Glyma.10G142800_16-53     | ..... |
| lcl Glyma.20G091400_16-53     | ..... |
| lcl Glyma.13G265400_16-53     | ..... |
| lcl Glyma.06G303600_75-104    | ..... |
| lcl Glyma.01G143600_200-252   | ..... |
| lcl Glyma.17G108900_203-255   | ..... |
| lcl Glyma.20G044300_97-142    | ..... |
| lcl Glyma.20G044600_112-155   | ..... |
| lcl Glyma.09G257100_165-208   | ..... |
| lcl Glyma.18G235300_138-182   | ..... |
| lcl Glyma.08G016300_162-207   | ..... |
| lcl Glyma.08G251300_174-216   | ..... |
| lcl Glyma.18G274000_173-215   | ..... |
| lcl Glyma.13G052000_177-221   | ..... |
| lcl Glyma.19G034700_177-219   | ..... |
| lcl Glyma.13G206800_34-78     | ..... |
| lcl Glyma.15G005300_166-208   | ..... |
| lcl Glyma.01G019300_126-171   | ..... |
| lcl Glyma.09G203400_19-64     | ..... |
| lcl Glyma.01G097900_111-159   | ..... |
| lcl Glyma.08G273400_110-158   | ..... |
| lcl Glyma.02G218200_86-131    | ..... |
| lcl Glyma.14G185600_109-152   | ..... |
| lcl Glyma.09G017200_92-144    | ..... |
| lcl Glyma.15G122900_92-144    | ..... |
| lcl Glyma.07G270000_80-128    | ..... |
| lcl Glyma.01G050400_262-297   | ..... |
| lcl Glyma.02G109200_262-297   | ..... |
| lcl Glyma.12G235700_273-332   | ..... |
| lcl Glyma.13G201200_274-333   | ..... |
| lcl Glyma.07G049700_1718-1767 | ..... |
| lcl Glyma.16G018400_1710-1759 | ..... |
| lcl Glyma.01G228500_290-332   | ..... |
| lcl Glyma.11G011300_290-332   | ..... |
| lcl Glyma.04G130500_337-383   | ..... |
| lcl Glyma.06G316600_337-383   | ..... |
| lcl Glyma.14G105900_232-269   | ..... |
| lcl Glyma.17G220500_232-277   | ..... |
| lcl Glyma.16G032000_12-61     | ..... |
| lcl Glyma.03G104400_860-896   | ..... |
| lcl Glyma.07G119500_861-897   | ..... |
| lcl Glyma.12G116100_524-572   | ..... |
| lcl Glyma.12G205300_519-567   | ..... |
| lcl Glyma.06G290800_524-572   | ..... |
| lcl Glyma.13G295600_507-555   | ..... |
| lcl Glyma.01G195200_69-131    | ..... |
| lcl Glyma.11G046500_134-196   | ..... |
| lcl Glyma.03G202600_12-76     | ..... |
| lcl Glyma.10G262600_10-74     | ..... |
| lcl Glyma.19G200200_10-74     | ..... |
| lcl Glyma.04G212300_16-53     | ..... |
| lcl Glyma.06G154100_14-76     | ..... |
| lcl Glyma.05G192100_12-74     | ..... |
| lcl Glyma.08G000400_12-74     | ..... |
| lcl Glyma.05G189600_16-52     | ..... |
| lcl Glyma.08G147200_16-52     | ..... |
| lcl Glyma.07G106000_30-93     | ..... |
| lcl Glyma.15G064800_12-50     | ..... |
| lcl Glyma.16G048700_180-229   | ..... |
| lcl Glyma.19G103000_221-270   | ..... |
| lcl Glyma.05G237500_1120-1165 | ..... |
| lcl Glyma.08G044700_1118-1163 | ..... |
| lcl Glyma.07G093700_1126-1171 | ..... |
| lcl Glyma.09G182600_1122-1167 | ..... |
| lcl Glyma.09G115100_1126-1168 | ..... |
| lcl Glyma.17G096900_1156-1201 | ..... |
| lcl Glyma.14G130700_200-247   | ..... |
| lcl Glyma.17G202700_200-247   | ..... |
| lcl Glyma.06G074300_199-246   | ..... |
| lcl Glyma.06G116800_4-50      | ..... |
| lcl Glyma.10G228500_5-52      | ..... |
| lcl Glyma.08G241700_44-77     | ..... |
| lcl Glyma.04G134700_4-52      | ..... |

TLYRLIHTW  
 TLYRLIHMW  
 TLRRLIQAW  
 TLRRLIQSW  
 TLRRLIQAW  
 TLRHLINQW  
 TLRHLIDQW  
 TLRHLIDQW  
 SLRIMIQDW



lcl|Glyma.11G157400\_5-54 .....  
lcl|Glyma.04G224200\_401-445 .....  
lcl|Glyma.06G140600\_410-454 .....  
lcl|Glyma.18G217900\_377-421 .....  
lcl|Glyma.08G354400\_21-65 .....  
lcl|Glyma.18G171400\_21-65 .....  
lcl|Glyma.15G237300\_55-95 .....  
lcl|Glyma.13G198800\_100-140 .....  
lcl|Glyma.04G235700\_61-101 .....  
lcl|Glyma.06G129000\_62-102 .....  
lcl|Glyma.03G257700\_48-88 .....  
lcl|Glyma.13G035400\_631-678 .....  
lcl|Glyma.14G156600\_631-678 .....  
lcl|Glyma.12G192700\_673-714 .....  
lcl|Glyma.13G309700\_670-711 .....  
lcl|Glyma.07G148900\_159-201 .....  
lcl|Glyma.18G200100\_157-199 .....  
lcl|Glyma.03G060000\_142-184 .....  
lcl|Glyma.07G195400\_147-189 .....  
lcl|Glyma.13G180900\_147-189 .....  
lcl|Glyma.13G240800\_150-198 .....  
lcl|Glyma.15G072700\_147-189 .....  
lcl|Glyma.18G063500\_143-185 .....  
lcl|Glyma.05G144300\_156-204 .....  
lcl|Glyma.08G100700\_156-204 .....  
lcl|Glyma.11G246100\_158-206 .....  
lcl|Glyma.18G011100\_158-206 .....  
lcl|Glyma.05G044700\_154-201 .....  
lcl|Glyma.11G246300\_78-119 .....  
lcl|Glyma.18G010900\_145-192 .....  
lcl|Glyma.02G309100\_117-162 .....  
lcl|Glyma.14G003700\_117-162 .....  
lcl|Glyma.12G001300\_129-175 .....  
lcl|Glyma.05G198100\_138-187 .....  
lcl|Glyma.04G165900\_213-256 .....  
lcl|Glyma.06G196600\_193-236 .....  
lcl|Glyma.16G063400\_170-217 .....  
lcl|Glyma.19G082000\_171-218 .....  
lcl|Glyma.12G180800\_764-813 .....  
lcl|Glyma.13G320000\_790-839 .....  
lcl|Glyma.20G087900\_859-904 .....  
lcl|Glyma.02G149800\_290-333 .....  
lcl|Glyma.10G024100\_292-330 .....  
lcl|Glyma.03G080300\_332-382 .....  
lcl|Glyma.16G008300\_327-377 .....  
lcl|Glyma.18G149800\_331-381 .....  
lcl|Glyma.04G043900\_344-393 .....  
lcl|Glyma.06G044100\_357-407 .....  
lcl|Glyma.07G150500\_385-433 .....  
lcl|Glyma.18G201500\_386-434 .....  
lcl|Glyma.10G181100\_405-450 .....  
lcl|Glyma.20G209400\_406-451 .....  
lcl|Glyma.03G180500\_289-337 .....  
lcl|Glyma.19G181100\_312-356 .....  
lcl|Glyma.10G052000\_291-337 .....  
lcl|Glyma.13G139400\_291-337 .....  
lcl|Glyma.13G326700\_239-283 .....  
lcl|Glyma.07G257200\_279-325 .....  
lcl|Glyma.17G016900\_219-265 .....  
lcl|Glyma.13G208500\_314-360 .....  
lcl|Glyma.15G104300\_316-362 .....  
lcl|Glyma.09G048200\_866-915 .....  
lcl|Glyma.15G155500\_861-910 .....  
lcl|Glyma.10G198600\_793-842 .....  
lcl|Glyma.20G191400\_792-841 .....  
lcl|Glyma.11G191900\_808-850 .....  
lcl|Glyma.12G082400\_798-847 .....  
lcl|Glyma.12G179300\_740-789 .....  
lcl|Glyma.13G321300\_793-842 .....  
lcl|Glyma.13G212200\_825-875 .....  
lcl|Glyma.15G100500\_827-877 .....  
lcl|Glyma.17G020500\_819-869 .....  
lcl|Glyma.07G253800\_821-871 .....  
lcl|Glyma.02G150400\_776-826 .....  
lcl|Glyma.05G112600\_659-709 .....  
lcl|Glyma.17G154400\_621-671 .....  
lcl|Glyma.11G042600\_620-669 .....  
lcl|Glyma.04G009100\_1020-1065 .....  
lcl|Glyma.06G009000\_1020-1065 .....  
lcl|Glyma.16G098500\_18-63 .....  
lcl|Glyma.07G159000\_32-77 .....  
lcl|Glyma.11G112700\_1028-1064 .....  
lcl|Glyma.12G038600\_1038-1083 .....  
lcl|Glyma.05G013200\_415-460 .....  
lcl|Glyma.17G121200\_415-460 .....  
lcl|Glyma.10G204900\_433-478 .....  
lcl|Glyma.20G185600\_422-467 .....  
lcl|Glyma.01G029500\_286-325 .....  
lcl|Glyma.02G035800\_286-325 .....  
lcl|Glyma.14G083900\_301-342 .....  
lcl|Glyma.17G241100\_292-333 .....  
lcl|Glyma.08G170400\_204-247 .....  
lcl|Glyma.15G256500\_288-331 .....  
lcl|Glyma.09G019900\_261-297 .....  
lcl|Glyma.15G126400\_264-300 .....  
lcl|Glyma.01G203300\_274-316 .....  
lcl|Glyma.11G039700\_281-323 .....  
lcl|Glyma.05G068400\_302-344 .....  
lcl|Glyma.17G150900\_309-344 .....  
lcl|Glyma.09G282200\_4713-4753 .....  
lcl|Glyma.20G003400\_4712-4751 .....  
lcl|Glyma.04G220000\_1217-1265 .....  
lcl|Glyma.06G145900\_1217-1265 .....

lcl|Glyma.08G358300\_319-375 .....  
lcl|Glyma.18G176600\_318-374 .....  
lcl|Glyma.12G063600\_316-372 .....  
lcl|Glyma.11G140000\_316-372 .....  
lcl|Glyma.13G335300\_323-381 .....  
lcl|Glyma.15G039100\_316-374 .....  
lcl|Glyma.08G315500\_281-340 .....  
lcl|Glyma.03G079200\_225-269 .....  
lcl|Glyma.16G094800\_214-258 .....  
lcl|Glyma.08G350900\_306-345 .....  
lcl|Glyma.18G165000\_306-353 .....  
lcl|Glyma.07G264100\_155-203 .....  
lcl|Glyma.17G009900\_146-194 .....  
lcl|Glyma.09G008200\_144-192 .....  
lcl|Glyma.15G112600\_157-205 .....  
lcl|Glyma.04G189900\_380-423 .....  
lcl|Glyma.06G175700\_381-424 .....  
lcl|Glyma.05G173500\_413-456 .....  
lcl|Glyma.08G130800\_413-456 .....  
lcl|Glyma.11G244000\_416-459 .....  
lcl|Glyma.18G013100\_412-455 .....  
lcl|Glyma.05G115700\_444-487 .....  
lcl|Glyma.19G051500\_449-492 .....  
lcl|Glyma.19G078600\_381-424 .....  
lcl|Glyma.19G124300\_227-270 .....  
lcl|Glyma.16G068400\_384-427 .....  
lcl|Glyma.04G211000\_388-427 .....  
lcl|Glyma.05G193500\_382-421 .....  
lcl|Glyma.08G234200\_376-419 .....  
lcl|Glyma.15G219300\_368-411 .....  
lcl|Glyma.10G238000\_315-375 .....  
lcl|Glyma.20G156600\_315-375 .....  
lcl|Glyma.09G143600\_314-374 .....  
lcl|Glyma.01G178600\_28-77 .....  
lcl|Glyma.11G063500\_28-77 .....  
lcl|Glyma.04G034500\_31-78 .....  
lcl|Glyma.06G034500\_29-78 .....  
lcl|Glyma.03G145700\_157-202 .....  
lcl|Glyma.19G148900\_156-201 .....  
lcl|Glyma.08G157200\_105-149 .....  
lcl|Glyma.15G269000\_105-151 .....  
lcl|Glyma.09G001100\_123-170 .....  
lcl|Glyma.12G240800\_129-176 .....  
lcl|Glyma.06G293400\_33-91 .....  
lcl|Glyma.12G112000\_36-91 .....  
lcl|Glyma.12G203900\_46-99 .....  
lcl|Glyma.13G297700\_44-94 .....  
lcl|Glyma.12G151200\_37-90 .....  
lcl|Glyma.07G196000\_33-84 .....  
lcl|Glyma.13G179900\_30-81 .....  
lcl|Glyma.13G239500\_29-80 .....  
lcl|Glyma.15G073700\_29-80 .....  
lcl|Glyma.14G099100\_339-384 .....  
lcl|Glyma.17G225600\_339-384 .....  
lcl|Glyma.01G074000\_824-869 .....  
lcl|Glyma.11G175700\_818-875 .....  
lcl|Glyma.02G267300\_828-871 .....  
lcl|Glyma.14G050200\_828-871 .....  
lcl|Glyma.10G288200\_718-762 .....  
lcl|Glyma.20G100800\_721-765 .....  
lcl|Glyma.04G125600\_69-110 .....  
lcl|Glyma.06G313000\_69-110 .....  
lcl|Glyma.10G155500\_28-80 .....  
lcl|Glyma.20G232800\_26-78 .....  
lcl|Glyma.04G255000\_11-57 .....  
lcl|Glyma.11G103800\_150-191 .....  
lcl|Glyma.12G028700\_150-191 .....  
lcl|Glyma.09G281300\_151-194 .....  
lcl|Glyma.20G004500\_80-121 .....  
lcl|Glyma.03G124900\_577-621 .....  
lcl|Glyma.03G214100\_219-270 .....  
lcl|Glyma.19G210900\_219-269 .....  
lcl|Glyma.10G018800\_210-261 .....  
lcl|Glyma.19G203000\_218-270 .....  
lcl|Glyma.08G153800\_209-269 .....  
lcl|Glyma.15G272400\_209-269 .....  
lcl|Glyma.08G154100\_188-251 .....  
lcl|Glyma.15G273000\_188-250 .....  
lcl|Glyma.10G151500\_34-80 .....  
lcl|Glyma.20G236700\_42-88 .....  
lcl|Glyma.19G232800\_18-67 .....  
lcl|Glyma.02G219200\_1354-1408 .....  
lcl|Glyma.14G186500\_414-466 .....  
lcl|Glyma.06G290400\_82-126 .....  
lcl|Glyma.12G116500\_60-104 .....  
lcl|Glyma.12G205500\_121-165 .....  
lcl|Glyma.13G295300\_124-168 .....  
lcl|Glyma.08G350700\_40-90 .....  
lcl|Glyma.13G177200\_138-181 .....  
lcl|Glyma.02G267800\_40-81 .....  
lcl|Glyma.14G049700\_46-87 .....  
lcl|Glyma.02G141500\_20-65 .....  
lcl|Glyma.10G032500\_19-64 .....  
lcl|Glyma.03G159500\_34-79 .....  
lcl|Glyma.19G161700\_18-63 .....  
lcl|Glyma.10G162800\_19-64 .....  
lcl|Glyma.20G225400\_20-65 .....  
lcl|Glyma.10G180300\_32-77 .....  
lcl|Glyma.03G165600\_25-74 .....  
lcl|Glyma.19G166900\_24-66 .....  
lcl|Glyma.13G220400\_468-515 .....  
lcl|Glyma.15G092000\_450-498 .....  
lcl|Glyma.09G099300\_2-43 .....

lcl|Glyma.15G209600\_2-43 .....  
lcl|Glyma.10G149400\_424-470 .....  
lcl|Glyma.20G238800\_406-452 .....  
lcl|Glyma.17G082300\_27-72 .....  
lcl|Glyma.19G042100\_335-385 .....  
lcl|Glyma.09G206500\_285-320 .....  
lcl|Glyma.02G103300\_678-724 .....  
lcl|Glyma.07G214600\_664-710 .....  
lcl|Glyma.04G039700\_603-649 .....  
lcl|Glyma.04G039800\_683-729 .....  
lcl|Glyma.06G041000\_657-703 .....  
lcl|Glyma.05G241900\_382-427 .....  
lcl|Glyma.08G049400\_328-373 .....  
lcl|Glyma.07G097700\_305-350 .....  
lcl|Glyma.09G180300\_320-365 .....  
lcl|Glyma.14G134600\_501-543 .....  
lcl|Glyma.17G198300\_478-520 .....  
lcl|Glyma.06G076600\_488-533 .....  
lcl|Glyma.03G179300\_494-542 .....  
lcl|Glyma.19G180000\_492-540 .....  
lcl|Glyma.10G051200\_482-530 .....  
lcl|Glyma.13G138700\_493-541 .....  
lcl|Glyma.06G229700\_316-362 .....  
lcl|Glyma.06G234500\_258-302 .....  
lcl|Glyma.11G156300\_288-334 .....  
lcl|Glyma.06G234300\_402-449 .....  
lcl|Glyma.12G158500\_402-449 .....  
lcl|Glyma.13G272700\_474-517 .....  
lcl|Glyma.04G249100\_149-193 .....  
lcl|Glyma.06G113900\_130-174 .....  
lcl|Glyma.13G031100\_152-196 .....  
lcl|Glyma.14G152800\_154-198 .....  
lcl|Glyma.10G284900\_291-328 .....  
lcl|Glyma.20G104300\_280-331 .....  
lcl|Glyma.11G132700\_192-240 .....  
lcl|Glyma.12G057100\_192-240 .....  
lcl|Glyma.12G237700\_196-240 .....  
lcl|Glyma.13G203300\_196-240 .....  
lcl|Glyma.03G184600\_122-174 .....  
lcl|Glyma.14G147100\_225-268 .....  
lcl|Glyma.01G219800\_243-291 .....  
lcl|Glyma.11G023700\_243-291 .....  
lcl|Glyma.13G170000\_1273-1321 .....  
lcl|Glyma.19G010200\_1251-1297 .....  
lcl|Glyma.02G013500\_1244-1297 .....  
lcl|Glyma.10G014100\_1243-1296 .....  
lcl|Glyma.02G295400\_391-439 .....  
lcl|Glyma.14G018000\_392-439 .....  
lcl|Glyma.09G059700\_234-289 .....  
lcl|Glyma.15G166200\_251-303 .....  
lcl|Glyma.17G059400\_224-279 .....  
lcl|Glyma.10G260400\_343-398 .....  
lcl|Glyma.20G130800\_344-399 .....  
lcl|Glyma.01G234300\_253-300 .....  
lcl|Glyma.11G008600\_251-297 .....  
lcl|Glyma.12G014900\_273-322 .....  
lcl|Glyma.11G109800\_273-322 .....  
lcl|Glyma.17G155700\_20-68 .....  
lcl|Glyma.04G163100\_13-61 .....  
lcl|Glyma.11G043500\_25-80 .....  
lcl|Glyma.06G230000\_305-354 .....  
lcl|Glyma.09G125400\_373-422 .....  
lcl|Glyma.10G227100\_4-50 .....  
lcl|Glyma.20G165200\_4-53 .....  
lcl|Glyma.04G214800\_25-74 .....  
lcl|Glyma.04G062400\_53-97 .....  
lcl|Glyma.06G063400\_53-97 .....  
lcl|Glyma.12G170900\_115-166 .....  
lcl|Glyma.13G328100\_115-166 .....  
lcl|Glyma.12G071300\_116-167 .....  
lcl|Glyma.04G253800\_296-345 .....  
lcl|Glyma.06G108500\_295-345 .....  
lcl|Glyma.15G219200\_660-708 .....  
lcl|Glyma.01G238300\_516-558 .....  
lcl|Glyma.11G005500\_722-764 .....  
lcl|Glyma.01G238200\_728-770 .....  
lcl|Glyma.11G005300\_720-760 .....  
lcl|Glyma.02G146500\_568-610 .....  
lcl|Glyma.03G155500\_313-355 .....  
lcl|Glyma.10G044200\_547-587 .....  
lcl|Glyma.13G131800\_545-585 .....  
lcl|Glyma.06G046500\_300-343 .....  
lcl|Glyma.11G170900\_521-564 .....  
lcl|Glyma.03G181800\_43-91 .....  
lcl|Glyma.11G074400\_81-126 .....  
lcl|Glyma.13G320100\_386-430 .....  
lcl|Glyma.02G296200\_232-286 .....  
lcl|Glyma.18G086000\_229-283 .....  
lcl|Glyma.13G197800\_36-86 .....  
lcl|Glyma.15G236400\_75-123 .....  
lcl|Glyma.13G057300\_662-708 .....  
lcl|Glyma.19G029100\_661-707 .....  
lcl|Glyma.02G227900\_820-872 .....  
lcl|Glyma.14G194800\_734-787 .....  
lcl|Glyma.11G171200\_781-832 .....  
lcl|Glyma.10G062700\_503-554 .....  
lcl|Glyma.13G147100\_501-557 .....  
lcl|Glyma.02G058300\_166-214 .....  
lcl|Glyma.06G319800\_166-214 .....  
lcl|Glyma.07G271400\_198-247 .....  
lcl|Glyma.17G002600\_199-248 .....  
lcl|Glyma.11G190000\_1281-1329 .....  
lcl|Glyma.12G084300\_1287-1335 .....

lc1|Glyma.12G180700\_1293-1341 .....  
lc1|Glyma.07G056000\_373-427 .....  
lc1|Glyma.16G024900\_371-425 .....  
lc1|Glyma.03G215600\_371-425 .....  
lc1|Glyma.19G212100\_374-428 .....  
lc1|Glyma.04G236500\_434-488 .....  
lc1|Glyma.06G127800\_441-495 .....  
lc1|Glyma.19G066800\_376-430 .....  
lc1|Glyma.01G179800\_176-228 .....  
lc1|Glyma.11G062400\_192-244 .....  
lc1|Glyma.02G059900\_158-214 .....  
lc1|Glyma.16G142700\_157-213 .....  
lc1|Glyma.12G160000\_164-201 .....  
lc1|Glyma.14G077800\_125-177 .....  
lc1|Glyma.17G247700\_120-172 .....  
lc1|Glyma.02G251800\_176-228 .....  
lc1|Glyma.14G065000\_141-193 .....  
lc1|Glyma.02G253700\_47-99 .....  
lc1|Glyma.18G030900\_10-66 .....  
lc1|Glyma.05G205800\_10-66 .....  
lc1|Glyma.08G012700\_10-66 .....  
lc1|Glyma.03G013900\_10-66 .....  
lc1|Glyma.07G073600\_10-66 .....  
lc1|Glyma.09G261800\_10-66 .....  
lc1|Glyma.18G230400\_10-66 .....  
lc1|Glyma.04G179800\_24-80 .....  
lc1|Glyma.05G034700\_11-67 .....  
lc1|Glyma.10G114300\_10-49 .....  
lc1|Glyma.20G085200\_10-49 .....  
lc1|Glyma.04G046200\_109-164 .....  
lc1|Glyma.06G047000\_109-164 .....  
lc1|Glyma.17G234700\_109-164 .....  
lc1|Glyma.10G256600\_111-167 .....  
lc1|Glyma.06G185000\_110-162 .....  
lc1|Glyma.17G092600\_110-166 .....  
lc1|Glyma.11G226400\_108-164 .....  
lc1|Glyma.14G062700\_108-164 .....  
lc1|Glyma.14G112700\_1508-1555 .....  
lc1|Glyma.13G253900\_326-371 .....  
lc1|Glyma.13G273500\_171-204 .....
