# Supplementary material for: Genome-wide analysis of genes encoding core components of the ubiquitin system in soybean (Glycine max) reveals a potential role for ubiquitination in host immunity against soybean cyst nematode
Source: PubMed Central journal article supplement (PMC6052599; doi:10.1186/s12870-018-1365-7), 2018-07-18
Supplement: 12870_2018_1365_MOESM9_ESM.pdf [file 12870_2018_1365_MOESM9_ESM.pdf]

| Human_Skp2                    | η1     |         |        | α1   |       |        | α2 |    |        |       |           |
|-------------------------------|--------|---------|--------|------|-------|--------|----|----|--------|-------|-----------|
|                               | 000    | 00      | 000000 | 0    | 0     | 000000 | 0  | 0  | 000000 |       |           |
|                               | 1      | 10      | 20     | 10   | 20    | 10     | 20 | 10 | 20     |       |           |
| Human_Skp2                    | VSWDSL | LPDE    | LLLG   | TFS  | CL    |        |    |    |        | PEL   | KV        |
| F-box                         |        | LPDE    | ILEE   | ILS  | KL    | D      |    |    |        | PKD   | LRL       |
| lcl Glyma.U017700_36-79       |        | ILSLDP  | IVTT   | IFA  | FL    |        |    |    |        | DMFD  | LVR       |
| lcl Glyma.12G196800_1201-1238 |        |         | LARI   | FH   | FLKS  |        |    |    |        | DLKS  | LVA       |
| lcl Glyma.11G054300_7-48      |        | DRLPID  | LLAH   | IFV  | LFT   |        |    |    |        | SFTD  | LAQA      |
| lcl Glyma.01G187800_7-48      |        | DRLPID  | LLAH   | IFV  | LFT   |        |    |    |        | SFTD  | LAQA      |
| lcl Glyma.03G106100_7-49      |        | DRLPID  | LLAY   | IFV  | LFT   |        |    |    |        | SFTD  | LAQA      |
| lcl Glyma.02G038300_46-79     |        | ALPYD   | VLAK   | IAA  | SFD   |        |    |    |        | D     | PNLRAA    |
| lcl Glyma.07G032000_3-39      |        | WSNLPFD | ILAN   | IFS  | FLS   |        |    |    |        | P     | DSLARA    |
| lcl Glyma.20G163800_142-184   |        | LPQD    | ILAH   | IFS  | FLE   |        |    |    |        | MKS   | LVSM      |
| lcl Glyma.10G229500_118-156   |        | PQD     | ILVL   | IFS  | FLD   |        |    |    |        | MKS   | LVS       |
| lcl Glyma.11G154400_33-71     |        |         | LMHI   | FN   | FLE   |        |    |    |        | PIPD  | RNT       |
| lcl Glyma.20G157500_17-57     |        |         | ILVK   | IFQ  | LFD   |        |    |    |        | IFEL  | TSGI      |
| lcl Glyma.10G236900_16-56     |        |         | ILVK   | IFQ  | LFD   |        |    |    |        | IFEL  | TSGI      |
| lcl Glyma.15G092200_20-66     |        | LDLPRD  | VVCT   | IFQ  | KLK   |        |    |    |        | AIET  | LTRA      |
| lcl Glyma.13G220200_14-60     |        | LDLPRD  | VVCT   | IFQ  | KLK   |        |    |    |        | AIET  | LTRA      |
| lcl Glyma.02G057300_20-59     |        |         | IIIT   | ILM  | SLN   |        |    |    |        | VVDL  | AV        |
| lcl Glyma.01G100400_3-33      |        |         |        |      | N     |        |    |    |        | VVDL  | AV        |
| lcl Glyma.15G192600_18-57     |        |         | ILIT   | IFM  | SVN   |        |    |    |        | IVDL  | AV        |
| lcl Glyma.06G101800_9-54      |        | WAEILPD | ALGV   | IFT  | NLS   |        |    |    |        | LQER  | VTVI      |
| lcl Glyma.04G100100_9-54      |        | WAEILPD | ALGV   | IFT  | NLS   |        |    |    |        | LQER  | VTVI      |
| lcl Glyma.19G157300_105-147   |        | PPD     | LTIK   | VFS  | MLD   |        |    |    |        | TQSL  | LCYA      |
| lcl Glyma.03G155100_106-148   |        | PPD     | LTIK   | VFS  | MLD   |        |    |    |        | TQSL  | LCYA      |
| lcl Glyma.08G024000_93-132    |        | LVPE    | ITTH   | ALS  | YLD   |        |    |    |        | YPSL  | LCRL      |
| lcl Glyma.05G217900_93-132    |        | LVPE    | ITTH   | ALS  | YLD   |        |    |    |        | YPSL  | LCRL      |
| lcl Glyma.16G025000_50-90     |        |         | IWTE   | IAK  | FLD   |        |    |    |        | GKSL  | VML       |
| lcl Glyma.18G265500_5-43      |        |         | VLKA   | VFP  | FLD   |        |    |    |        | GVDL  | LASC      |
| lcl Glyma.08G243300_5-43      |        |         | VLKA   | VFP  | FLD   |        |    |    |        | SVDL  | LASC      |
| lcl Glyma.17G237800_42-82     |        | DN      | VLFE   | VLK  | HVD   |        |    |    |        | ARSL  | LAMA      |
| lcl Glyma.14G086600_29-69     |        | N       | VLSE   | VLR  | HVD   |        |    |    |        | ARSL  | LAMA      |
| lcl Glyma.06G043400_36-75     |        |         | LLFE   | VLK  | HVD   |        |    |    |        | ARTL  | LAMA      |
| lcl Glyma.04G042900_45-84     |        |         | LLFE   | VLK  | HVD   |        |    |    |        | ARTL  | LAMA      |
| lcl Glyma.17G225800_189-229   |        | D       | LLHM   | VFS  | FLD   |        |    |    |        | HPNL  | LCKA      |
| lcl Glyma.14G098900_182-222   |        | D       | LLHM   | VFS  | FLD   |        |    |    |        | HPNL  | LCKA      |
| lcl Glyma.06G055800_103-143   |        | D       | LLHM   | VFS  | FLD   |        |    |    |        | HPNL  | LCKA      |
| lcl Glyma.04G055700_105-145   |        | D       | LLHM   | VFS  | FLD   |        |    |    |        | HPNL  | LCKA      |
| lcl Glyma.20G190700_8-41      |        | DE      | ILVE   | IFR  | RLPS  |        |    |    |        | KSIL  | VRC       |
| lcl Glyma.10G199800_8-41      |        | DE      | ILVE   | IFR  | RLPS  |        |    |    |        | KSIL  | VRC       |
| lcl Glyma.20G166900_52-105    |        | WASLPPE | LLRD   | VIN  | RLEAS |        |    |    |        | ESTWP | GRKHVVAC  |
| lcl Glyma.10G224900_52-105    |        | WASLPPE | LLRD   | VIN  | RLEAS |        |    |    |        | ESTWP | GRKHVVAC  |
| lcl Glyma.12G115200_19-72     |        | WASLPPE | LLRD   | VIN  | RLEAS |        |    |    |        | ESTWP | GRKHVVAC  |
| lcl Glyma.07G147700_29-81     |        | ASLLE   | LLRD   | VIN  | RLEAS |        |    |    |        | ESTWP | GRKHVVAC  |
| lcl Glyma.16G167200_50-103    |        | WASLPPE | LLRD   | VIN  | RLEAS |        |    |    |        | ESTWP | GRKHVVAC  |
| lcl Glyma.02G081800_50-103    |        | WASLPPE | LLRD   | VIN  | RLEAS |        |    |    |        | ESTWP | GRKHVVAC  |
| lcl Glyma.15G049500_52-105    |        | WASLPPE | LLFD   | IR   | RLEES |        |    |    |        | ENTWP | ARKHVVAC  |
| lcl Glyma.08G183100_52-105    |        | WASLPPE | LLFD   | IR   | RLEES |        |    |    |        | ENTWP | ARKHVVAC  |
| lcl Glyma.17G251500_81-133    |        | WANLPPE | LLLD   | IQ   | RLEAS |        |    |    |        | ETSWP | PARRALVAC |
| lcl Glyma.14G073500_59-110    |        | WANLPPE | LLLD   | IQ   | RLEAS |        |    |    |        | ETSWP | PARRALVAC |
| lcl Glyma.16G138100_55-106    |        | ANLPSE  | LLLD   | IQ   | RLEES |        |    |    |        | ETSWP | PARAVVVC  |
| lcl Glyma.02G055300_55-106    |        | ANLPSE  | LLLD   | IQ   | RVEES |        |    |    |        | ETSWP | PARAVVVC  |
| lcl Glyma.11G069400_54-106    |        | WANLPPE | LLLD   | IR   | RVEDS |        |    |    |        | ETTW  | PARAVVVC  |
| lcl Glyma.01G173700_55-106    |        | ANLPPE  | LLLD   | IR   | RVEDS |        |    |    |        | ETTW  | PARAVVVC  |
| lcl Glyma.15G098200_32-82     |        | WANMPQE | LLRE   | VLF  | RLEAS |        |    |    |        | EDAW  | PPRKSVVAC |
| lcl Glyma.13G214900_36-87     |        | WANMPQE | LLRE   | VLL  | RLEAS |        |    |    |        | EDTW  | PPRKSVVAC |
| lcl Glyma.17G022700_13-56     |        | WANMPHE | LLRE   | VLL  | RLEES |        |    |    |        | ESTWP | PLRRSVVAC |
| lcl Glyma.13G269600_48-95     |        | SNMLPE  | ILGE   | IVR  | RVDAA |        |    |    |        | EEQWP | NRRQNVVAC |
| lcl Glyma.12G230000_46-93     |        | SSMLPE  | ILGE   | IVR  | RVDAA |        |    |    |        | EEQWP | NRRQNVVAC |
| lcl Glyma.19G161300_136-172   |        | GLPGN   | LLWE   | VLR  | RLPP  |        |    |    |        | AGLL  | LTA       |
| lcl Glyma.03G158900_123-159   |        | GLPGN   | LLWE   | VLR  | RLPP  |        |    |    |        | AGLL  | LTA       |
| lcl Glyma.10G032000_129-167   |        | PAS     | LMWE   | VMR  | RLPP  |        |    |    |        | PGLL  | LTA       |
| lcl Glyma.02G142300_127-164   |        | LPAR    | LLWE   | VMR  | RLPP  |        |    |    |        | PGLL  | LTA       |
| lcl Glyma.06G115200_63-108    |        | SLPDE   | LLFE   | VFA  | RLTP  |        |    |    |        | YDLG  | LTA       |
| lcl Glyma.04G247500_63-108    |        | SLPDE   | LLFE   | VFA  | RLTP  |        |    |    |        | YDLG  | LTA       |
| lcl Glyma.20G075000_5-43      |        | LPDE    | LLVE   | ILS  | WVPV  |        |    |    |        | KDL   | LRF       |
| lcl Glyma.19G048900_32-63     |        | PRE     | LLVE   | ILS  | WLPV  |        |    |    |        | KSIL  | LRI       |
| lcl Glyma.13G114500_13-47     |        | PCE     | LOVE   | IPP  | WLEP  |        |    |    |        | KTLL  | LRL       |
| lcl Glyma.15G101600_25-67     |        | FLPDE   | LVVE   | ILS  | RLPV  |        |    |    |        | KSIL  | LQF       |
| lcl Glyma.13G211000_47-89     |        | FLPDE   | LVVE   | ILS  | RLPV  |        |    |    |        | KSIL  | LQF       |
| lcl Glyma.15G101700_47-83     |        | PIE     | LIQE   | ILQ  | RLPV  |        |    |    |        | KFL   | LQF       |
| lcl Glyma.02G126700_3-26      |        | HITLPLE | LIRE   | ILR  | RLRV  |        |    |    |        | KSIL  | LQF       |
| lcl Glyma.05G071700_5-43      |        | LLPEE   | LIVE   | ILS  | WVPV  |        |    |    |        | KALM  | QF        |
| lcl Glyma.05G071400_5-43      |        | LLPEE   | LIVE   | ILS  | WVPV  |        |    |    |        | KALM  | QF        |
| lcl Glyma.08G353000_5-43      |        | LLPEE   | LIVE   | ILS  | WVPV  |        |    |    |        | KALM  | QF        |
| lcl Glyma.08G134900_8-42      |        | PEE     | LIVE   | ILS  | WVPV  |        |    |    |        | KPLM  | RF        |
| lcl Glyma.05G166200_5-38      |        | SED     | LIVE   | ILT  | WVPV  |        |    |    |        | KSIL  | MRF       |
| lcl Glyma.02G041600_10-43     |        | PED     | LIVE   | ILS  | WVEV  |        |    |    |        | KNL   | MRF       |
| lcl Glyma.19G256900_7-41      |        | PQD     | QIVE   | ILS  | WHPV  |        |    |    |        | KVL   | MRF       |
| lcl Glyma.06G181300_17-52     |        | E       | VVVE   | ILS  | WVPV  |        |    |    |        | KALM  | RF        |
| lcl Glyma.05G071600_7-39      |        | IE      | LIVE   | ILS  | WLPV  |        |    |    |        | KPLI  | RF        |
| lcl Glyma.05G071300_7-39      |        | IE      | LIVE   | ILS  | WLPV  |        |    |    |        | KPLI  | RF        |
| lcl Glyma.08G352900_7-37      |        | IE      | LIVE   | ILS  | WLPV  |        |    |    |        | KPLI  | RF        |
| lcl Glyma.17G116300_16-49     |        |         | LSVE   | ILS  | WLPV  |        |    |    |        | KVL   | RF        |
| lcl Glyma.17G044800_8-45      |        | PGD     | LIVE   | ILS  | WLPV  |        |    |    |        | DALL  | RF        |
| lcl Glyma.13G114400_4-34      |        |         | ILS    | WLPV |       |        |    |    |        | KALL  | RF        |
| lcl Glyma.08G350400_8-50      |        | YVPDD   | LIVE   | ILS  | RLPV  |        |    |    |        | KDL   | RF        |
| lcl Glyma.19G048800_4-37      |        | QLPQD   | LIEE   | ILS  | WLPV  |        |    |    |        | KSIL  | MRF       |
| lcl Glyma.19G048700_4-37      |        | QLPQD   | LIEE   | ILS  | WLPV  |        |    |    |        | KSIL  | MRF       |
| lcl Glyma.19G048600_4-37      |        | QLPQD   | LIEE   | ILS  | WLPV  |        |    |    |        | KSIL  | MRF       |
| lcl Glyma.19G048300_4-37      |        | QLPQD   | LIEE   | ILS  | WLPV  |        |    |    |        | KSIL  | MRF       |
| lcl Glyma.19G048000_4-37      |        | QLPQD   | LIEE   | ILS  | WLPV  |        |    |    |        | KSIL  | MRF       |
| lcl Glyma.19G048200_4-37      |        | QLPQD   | LIEE   | ILA  | WLPV  |        |    |    |        | KSIL  | MRF       |
| lcl Glyma.19G048100_4-37      |        | QLPQD   | LIEE   | ILA  | WLPV  |        |    |    |        | KSIL  | MRF       |
| lcl Glyma.19G049000_4-37      |        | QLPQD   | LIEE   | ILS  | WLPV  |        |    |    |        | KSIL  | MRF       |
| lcl Glyma.19G048500_4-37      |        | QLPQD   | LIEE   | ILS  | WLPV  |        |    |    |        | KSIL  | MRF       |
| lcl Glyma.07G156800_28-66     |        | FEK     | LMME   | VLS  | WLPV  |        |    |    |        | KSIL  | VR        |
| lcl Glyma.18G168800_12-48     |        | CEE     | LIEE   | ILS  | RLPV  |        |    |    |        | KPLI  | QF        |
| lcl Glyma.18G161800_14-47     |        | E       | LIEE   | ILS  | RLPV  |        |    |    |        | KPLI  | QF        |
| lcl Glyma.18G168300_12-48     |        | CDE     | LIEE   | ILS  | RLPV  |        |    |    |        | KPLI  | QF        |
| lcl Glyma.18G160800_12-48     |        | CDE     | LIEE   | ILS  | RLPV  |        |    |    |        | KPLI  | QF        |
| lcl Glyma.18G162900_12-48     |        | CDE     | LIEE   | ILS  | RLPV  |        |    |    |        | KPLI  | QF        |
| lcl Glyma.18G163200_12-48     |        | CDE     | LIEE   | ILS  | RLPV  |        |    |    |        | KPLI  | QF        |
| lcl Glyma.18G168500_1-31      |        |         | E      | ILS  | RLPV  |        |    |    |        | KPLI  | QF        |
| lcl Glyma.18G161900_12-48     |        | CDE     | LIEE   | ILS  | RLPV  |        |    |    |        | KPLI  | QF        |

|                             |          |         |       |         |
|-----------------------------|----------|---------|-------|---------|
| lc1 Glyma.18G162500_12-48   | CDE      | LIKEILS | RFPV  | KPLIQF  |
| lc1 Glyma.18G160700_1-30    |          | EILS    | RFPV  | KPLIQF  |
| lc1 Glyma.18G162400_12-48   | CDE      | LIKEILS | RFPV  | KPLIQF  |
| lc1 Glyma.18G161500_14-48   | E        | LIKEILS | CLPV  | KTLLIQF |
| lc1 Glyma.18G162700_12-49   | CDE      | LFEEILS | RFPV  | KPLMQF  |
| lc1 Glyma.18G162600_11-49   | LLCNE    | IIKEILS | RFPV  | KPLIQF  |
| lc1 Glyma.18G162300_14-50   | CNE      | IIKEILS | RFPV  | KPLIQF  |
| lc1 Glyma.18G168000_8-37    |          | ILS     | RFLPM | KPLIQF  |
| lc1 Glyma.18G163100_10-47   | LLCNK    | ITEEILS | RFPV  | KPLIQF  |
| lc1 Glyma.14G160200_8-46    | LSLLCNE  | ITEEILS | RFPV  | KPLIQF  |
| lc1 Glyma.18G162800_10-46   | LLCNE    | ITEEILS | RFPV  | KPLIPF  |
| lc1 Glyma.18G276400_6-41    | RE       | LTEKILI | KLPV  | KSLVSF  |
| lc1 Glyma.20G073200_7-44    | PFDD     | LIVEILL | RFSV  | RSLLRF  |
| lc1 Glyma.07G187200_13-47   | D        | LTIEILL | RFPV  | RCLLRF  |
| lc1 Glyma.16G203000_9-45    | PED      | LTIEILL | MFPV  | RSILRF  |
| lc1 Glyma.16G202600_12-48   | PED      | LTIEILL | MFPV  | RSILRF  |
| lc1 Glyma.16G202900_12-48   | PED      | LTIEILL | MFPV  | RSILRF  |
| lc1 Glyma.16G202800_1-34    |          | LTIEILL | MFPV  | RSILRF  |
| lc1 Glyma.01G232700_12-48   | PED      | LTIEILL | MFPV  | RSILRF  |
| lc1 Glyma.10G117700_28-64   | PLE      | LTIEILL | RFPV  | RSVLRP  |
| lc1 Glyma.08G252000_10-33   | PLE      | LTIEILL | RSPV  | RSVLRP  |
| lc1 Glyma.08G252300_8-45    | PLE      | LTIEVLL | RFPV  | RSVLRP  |
| lc1 Glyma.18G274900_8-44    | PLE      | LTIEILL | RFPV  | RSVLGF  |
| lc1 Glyma.07G148300_5-41    | LPLE     | LTIEILL | RFPV  | RSILRF  |
| lc1 Glyma.18G274700_8-46    | PLD      | LIEILL  | KLPV  | KSVTRF  |
| lc1 Glyma.03G116000_13-48   | GE       | LIGAILL | WFPV  | RSVLRP  |
| lc1 Glyma.18G274500_6-42    | PME      | LMREILL | RFPV  | RSVSRF  |
| lc1 Glyma.08G251800_6-42    | PMD      | LMREILL | RFPV  | RSVSRF  |
| lc1 Glyma.17G162200_4-40    | LPDD     | QIVILL  | RFPV  | RTLRRF  |
| lc1 Glyma.10G132100_7-44    | PDE      | LIVEILL | RFPV  | RTLRRF  |
| lc1 Glyma.06G197100_7-43    | PDD      | MMEEILL | RFPV  | KCLLRF  |
| lc1 Glyma.06G197000_14-50   | PDE      | LMEEILL | RFPV  | RCLVRF  |
| lc1 Glyma.10G220200_8-46    | LWLLPEE  | LISEILF | RVPV  | RSLLQF  |
| lc1 Glyma.02G188000_34-67   | E        | LISNLIH | RVPV  | RSLLQF  |
| lc1 Glyma.10G220500_40-78   | VLPYD    | LWELL   | RVPV  | RSLLIF  |
| lc1 Glyma.06G016300_7-47    | MFPDD    | LIVNLLS | RFPV  | RSMLRS  |
| lc1 Glyma.08G252200_30-68   | PPE      | LIREILL | SFPV  | NSLLQC  |
| lc1 Glyma.06G197200_5-41    | PEE      | LIQVILL | RFLP  | RNLLHL  |
| lc1 Glyma.18G274800_22-60   | LPQE     | LIREILL | RFPV  | KSLLRF  |
| lc1 Glyma.13G109000_20-53   | PEE      | LTIEILL | RFPV  | KSLLRF  |
| lc1 Glyma.17G017600_31-68   | LPQE     | LIEHILL | RFPV  | KSLLRF  |
| lc1 Glyma.16G164000_14-50   | PQE      | LIEILL  | RFPV  | KSLVRF  |
| lc1 Glyma.02G079600_14-50   | PQE      | LIEILL  | RFPV  | KSLVRF  |
| lc1 Glyma.06G126800_15-54   | AILPWE   | LIEILL  | RFPV  | KSLVRF  |
| lc1 Glyma.17G027000_18-43   | PQE      | LIIQILL | RFPV  | KSLIRF  |
| lc1 Glyma.07G247000_18-54   | PQE      | LIIQILL | RFPV  | KSLLRF  |
| lc1 Glyma.20G014700_28-52   | PLE      | LTIEIFL | RFLP  | KSLIRF  |
| lc1 Glyma.17G021300_21-61   | PQD      | LVIQILL | RFPV  | KSLVRF  |
| lc1 Glyma.08G098000_3-39    | PQD      | LTIEILL | RFPV  | KSLVRF  |
| lc1 Glyma.08G251700_6-43    | HD       | LIVEILL | RFLP  | KSLLRF  |
| lc1 Glyma.18G256100_8-31    | PIE      | LIEILL  | RFSV  | RHVTRF  |
| lc1 Glyma.15G055200_11-42   | PYD      | VINILK  | RFPV  | KSLIRF  |
| lc1 Glyma.09G032600_10-43   | DE       | VVIQILA | RFPV  | KSLFRF  |
| lc1 Glyma.02G128400_30-69   | LPDEI    | MLFKILP | LPS   | KTLLRF  |
| lc1 Glyma.17G008200_11-50   | ANLPVE   | VVTEILS | RFPV  | KSVIRL  |
| lc1 Glyma.07G265800_3-43    | NLPVE    | VVTEILS | RFPV  | KSVIRL  |
| lc1 Glyma.15G115100_4-44    | LPRE     | VTEILS  | RFPV  | RSLLRF  |
| lc1 Glyma.09G010600_4-42    | LPRE     | VVTDILS | RFLP  | KSLLRF  |
| lc1 Glyma.06G045700_5-48    | WSKLPPD  | VVEHILL | LPL   | KTLLNL  |
| lc1 Glyma.04G045200_5-49    | WSKLPPD  | VVEHILL | LPL   | KTLLNL  |
| lc1 Glyma.14G088700_35-79   | SKLPPE   | ILEYILS | FPL   | KTLLNL  |
| lc1 Glyma.19G081700_4-43    | LPQE     | LVSNILS | RFLP  | IDLVKC  |
| lc1 Glyma.16G063500_47-81   | LPQE     | LVSNILS | RFLP  | KDLVKC  |
| lc1 Glyma.19G081500_1-45    | SMEHLPRE | LVSNILS | RFLP  | KVLLLC  |
| lc1 Glyma.16G063600_1-45    | SMEHLPGE | LVSNILS | RFLP  | KVLLLC  |
| lc1 Glyma.15G220600_3-41    | YLPEA    | LVLOILY | RFPV  | TLVKC   |
| lc1 Glyma.16G161700_9-36    |          | FEVFS   | CLPA  | KAIHFR  |
| lc1 Glyma.15G092300_5-37    | DEL      | LLFKICS | YFLP  | KAIYRF  |
| lc1 Glyma.03G020200_4-34    | SHD      | ELLEIFS | RFLP  | KAIYRF  |
| lc1 Glyma.04G198800_33-68   | LCND     | ALFEIFL | RFPV  | EVLPFR  |
| lc1 Glyma.09G075900_20-65   | INNLFPD  | SLTEIFC | KLPC  | KSLFTC  |
| lc1 Glyma.07G022100_3-47    | INNLSPD  | VMGEIFI | RFPV  | RSTVKC  |
| lc1 Glyma.02G083400_9-46    | LAED     | SLRQIFC | RFLP  | REIMIC  |
| lc1 Glyma.19G252100_40-81   | DVLPDD   | LLERILA | YFLP  | ASIFRA  |
| lc1 Glyma.03G254500_40-81   | DVLPDD   | LLERILA | YFLP  | ASIFRA  |
| lc1 Glyma.08G088700_46-81   | WSKLPQR  | LLDRVLA | FPLP  | PAFFRA  |
| lc1 Glyma.08G104800_104-143 | KNLPED   | LFEPVIA | RFLP  | ATFFCF  |
| lc1 Glyma.05G147900_105-145 | KNLPED   | LFEPVIA | RFLP  | ATFFRF  |
| lc1 Glyma.18G005400_113-153 | KDFPED   | LFEPVIA | RFLP  | ATFFRF  |
| lc1 Glyma.17G220600_21-64   | SLDDLNE  | LLERVLS | WLPT  | SSFFRL  |
| lc1 Glyma.14G105800_21-64   | SLDDLNE  | LLERVLS | WLPT  | SSFFRL  |
| lc1 Glyma.06G058900_28-68   | SLDDLNE  | LFERILS | WLPT  | STFFRL  |
| lc1 Glyma.04G058200_28-68   | SLDDLNE  | LFERILS | WLPT  | STFFRL  |
| lc1 Glyma.18G275900_100-142 | AMLPED   | LLHEILA | RVPV  | FLIFRL  |
| lc1 Glyma.08G253600_95-137  | AMLPED   | LLHEILA | RVPV  | FLIFRL  |
| lc1 Glyma.13G209700_23-63   | PED      | LMIEILA | RVRV  | SNPLQL  |
| lc1 Glyma.06G168700_28-71   | LSMLNE   | LQNILA  | RFLP  | LHFASA  |
| lc1 Glyma.04G196900_27-69   | LSMLNE   | LQNILA  | RFLP  | LHFASA  |
| lc1 Glyma.19G162400_18-54   | PGLPND   | VASILS  | MVPV  | SHHGRL  |
| lc1 Glyma.03G160600_17-56   | PGLPND   | VASILS  | KVPV  | SHHGRL  |
| lc1 Glyma.19G158300_6-45    | GLPDA    | VAIRCLA | RVPV  | YLHPVL  |
| lc1 Glyma.03G156000_5-45    | ERLPDA   | VAIRCLA | RVPV  | YLHPVL  |
| lc1 Glyma.10G028000_6-45    | GLPDA    | VAIRCLA | WVPV  | YLHPKL  |
| lc1 Glyma.06G146500_19-60   | PSPDPD   | VALNCLG | RIPR  | SOHPTL  |
| lc1 Glyma.04G219400_21-60   | PND      | VALNCLA | RIPR  | SHHPTL  |
| lc1 Glyma.07G071600_25-62   | CGLPDD   | ISLMCLA | RIPR  | KYHSVL  |
| lc1 Glyma.03G010000_2-33    |          | SLMCLA  | RIPR  | KYHSVL  |
| lc1 Glyma.07G071500_32-72   | CGLPDD   | ISLMCLA | RIPR  | KYHSVM  |
| lc1 Glyma.07G071400_25-62   | CGLPDD   | LSLMCLA | RVPV  | KYHSVM  |
| lc1 Glyma.08G112900_78-117  | PGLPDD   | LAIACLI | RVPV  | VEHGKL  |
| lc1 Glyma.05G155000_78-117  | PGLPDD   | LAIACLI | RVPV  | VEHSKL  |
| lc1 Glyma.19G005000_68-104  | PGLPDD   | LAIACLI | RVPV  | VEHKKL  |
| lc1 Glyma.09G019400_18-59   | LSGLPDD  | LAIACLI | RVPV  | IEHKKL  |

lcl|Glyma.15G093300\_53-91 . . . . . PGLPDD. VALNCLL. . . . . RLPV. . . . . QSHSSC  
lcl|Glyma.13G218800\_53-91 . . . . . PGLPDD. VALNCLL. . . . . RLPV. . . . . QSHSSC  
lcl|Glyma.18G007900\_34-73 . . . . . PGLPDD. VAEYCLA. . . . . LVPR. . . . . SNFPAM  
lcl|Glyma.11G249300\_49-87 . . . . . PGLPDD. VAEYCLA. . . . . LVPR. . . . . SNFPAM  
lcl|Glyma.08G103400\_52-91 . . . . . PGLPDD. VSKHCLA. . . . . LVPR. . . . . SNFPAM  
lcl|Glyma.15G013300\_4-46 . . . . . SGLPED. VARDCLI. . . . . RVPY. . . . . DQFPAV  
lcl|Glyma.13G360600\_4-47 . . . . . SGLPED. VARDCLI. . . . . RVPY. . . . . EQFPAV  
lcl|Glyma.08G207700\_4-46 . . . . . SGLPED. VARDCLI. . . . . RVSY. . . . . QOFPTV  
lcl|Glyma.07G034400\_4-36 . . . . . SGLPED. VARDCLI. . . . . RVSY. . . . . QOFPTV  
lcl|Glyma.20G045100\_49-89 . . . . . ISSLPDD. IVLDCLS. . . . . RVPT. . . . . SSLPAL  
lcl|Glyma.05G155600\_55-96 . . . . . PKLPSE. LGLECLT. . . . . RLPH. . . . . SAHRVA  
lcl|Glyma.06G016400\_142-179 . . . . . PDD. ILEMCLV. . . . . RLPL. . . . . TSLMNA  
lcl|Glyma.04G016300\_139-176 . . . . . PDD. ILEMCLV. . . . . RLPL. . . . . TSLMNA  
lcl|Glyma.19G246800\_38-73 . . . . . D. ILHEL. . . . . RLPP. . . . . PTISKL  
lcl|Glyma.03G249300\_21-56 . . . . . D. ILHEL. . . . . RLPP. . . . . PTISKL  
lcl|Glyma.06G076900\_64-102 . . . . . PGLPYE. IABELCLL. . . . . HVPY. . . . . PYQALS  
lcl|Glyma.02G036400\_11-44 . . . . . ILEAIFS. . . . . HVPL. . . . . IHLVPA  
lcl|Glyma.01G028800\_12-45 . . . . . ILEAIFS. . . . . HVPL. . . . . IHLVPA  
lcl|Glyma.08G284600\_18-52 . . . . . ILEAIFS. . . . . HVPL. . . . . IHLVPA  
lcl|Glyma.18G141000\_17-47 . . . . . ILEAIFS. . . . . HVPL. . . . . IHLVSA  
lcl|Glyma.08G259900\_8-42 . . . . . NSD. ILLEILS. . . . . HVPA. . . . . KDLLSL  
lcl|Glyma.01G083900\_11-43 . . . . . ILLEILS. . . . . HVPA. . . . . KDLLSL  
lcl|Glyma.14G167900\_43-84 . . . . . PNLPDE. LSLQIIA. . . . . RLPR. . . . . ICYHVH  
lcl|Glyma.13G086000\_43-84 . . . . . PNLPDE. LSLQIIA. . . . . RLPR. . . . . ICYHVH  
lcl|Glyma.06G106800\_43-84 . . . . . PNLPDE. LSLQIIA. . . . . RLPR. . . . . ICYFNV  
lcl|Glyma.04G107000\_43-84 . . . . . PNLPDE. LSLQIIA. . . . . RLPR. . . . . ICYFNV  
lcl|Glyma.15G214000\_43-89 . . . . . PNLPDD. LSLQIIA. . . . . RLPR. . . . . ICYHVH  
lcl|Glyma.08G074400\_43-84 . . . . . PSLPDE. ISIQILA. . . . . RVPR. . . . . IYLLNL  
lcl|Glyma.05G119400\_43-84 . . . . . PSLPDE. ISIQILA. . . . . RVPR. . . . . IYLLNL  
lcl|Glyma.08G298900\_194-236 . . . . . RMNRD. SSIACLS. . . . . RCSR. . . . . SDYGSL  
lcl|Glyma.02G105600\_194-236 . . . . . RMNRD. SSIACLS. . . . . RCSR. . . . . SDYGSL  
lcl|Glyma.13G326800\_49-82 . . . . . ID.D. VALNCLA. . . . . WVSG. . . . . SDYAVL  
lcl|Glyma.20G215600\_15-54 . . . . . LSGLPDE. ILLIMS. . . . . FT.MI. . . . . KDAVQT  
lcl|Glyma.10G175100\_15-54 . . . . . LSGLPDE. ILLIMS. . . . . FT.MI. . . . . KDAVQT  
lcl|Glyma.17G078800\_21-60 . . . . . LSNLPDD. IIDRVLY. . . . . FL.DA. . . . . VSAVQT  
lcl|Glyma.07G004400\_30-68 . . . . . SNLPDE. VLHRLS. . . . . FL.DA. . . . . KSAVQT  
lcl|Glyma.16G177700\_131-169 . . . . . ISELPDN. VLLHIMN. . . . . FV.DT. . . . . KDAVQT  
lcl|Glyma.09G139100\_17-56 . . . . . ISEFPDH. VLLHIMS. . . . . LM.DT. . . . . KSAVRT  
lcl|Glyma.09G140100\_13-51 . . . . . ISELPIS. VLLHILE. . . . . FM.NT. . . . . KDAVQT  
lcl|Glyma.09G130200\_31-69 . . . . . ISELPDS. ILLHILN. . . . . FM.NT. . . . . ESAVQT  
lcl|Glyma.09G140200\_31-69 . . . . . ISELPDS. VLLHIE. . . . . FM.DT. . . . . KSGVQT  
lcl|Glyma.13G224200\_116-152 . . . . . ISALPDS. LLFHMN. . . . . FM.DT. . . . . KSAVQT  
lcl|Glyma.09G139800\_14-52 . . . . . ISELPDN. ILLHMN. . . . . FM.DT. . . . . REAVQT  
lcl|Glyma.09G139700\_14-52 . . . . . ISEMPDN. ILLHMN. . . . . FM.DT. . . . . REAVQT  
lcl|Glyma.09G139900\_29-68 . . . . . ISELPDN. ILLHMD. . . . . FM.DT. . . . . REAVQT  
lcl|Glyma.10G136700\_25-60 . . . . . LPEN. VLLHIMN. . . . . FM.ET. . . . . RHAVQT  
lcl|Glyma.09G141700\_24-62 . . . . . LSELPPDC. VVHIME. . . . . FM.DT. . . . . KYAVQT  
lcl|Glyma.09G141600\_32-70 . . . . . LSELPPDC. VVHIME. . . . . FM.DT. . . . . KYAVQT  
lcl|Glyma.09G141500\_32-70 . . . . . LSELPPDC. VVHIME. . . . . FM.DT. . . . . KYAVQT  
lcl|Glyma.09G141400\_32-70 . . . . . LSELPPDC. VVHIME. . . . . FM.DT. . . . . KYAVQT  
lcl|Glyma.09G141300\_32-70 . . . . . LSELPPDC. VVHIME. . . . . FM.DT. . . . . KYAVQT  
lcl|Glyma.09G141200\_32-70 . . . . . LSELPPDC. VVHIME. . . . . FM.DT. . . . . KYAVQT  
lcl|Glyma.09G141100\_32-70 . . . . . LSELPPDC. VVHIME. . . . . FM.DT. . . . . KYAVQT  
lcl|Glyma.10G134800\_20-58 . . . . . LSELPPDC. ILLYIMK. . . . . FM.NT. . . . . KYAVQT  
lcl|Glyma.09G142000\_40-78 . . . . . LSDLPDF. VLLHIMK. . . . . FM.SM. . . . . KHAVQT  
lcl|Glyma.10G135600\_12-49 . . . . . LSELPPDF. VLLHIMN. . . . . FI.DT. . . . . KDALRT  
lcl|Glyma.10G135200\_27-64 . . . . . LSELPPDF. VLLHIMN. . . . . FI.DT. . . . . KDALRT  
lcl|Glyma.10G135500\_27-64 . . . . . LSELPPDF. VLLHIMN. . . . . FI.YT. . . . . KDALRT  
lcl|Glyma.09G130100\_116-155 . . . . . ISELPDT. VLLHILN. . . . . FM.DT. . . . . KDAVQT  
lcl|Glyma.06G098100\_17-56 . . . . . LSDLPEC. VLLHILT. . . . . FL.NA. . . . . KHAVRT  
lcl|Glyma.15G227900\_18-56 . . . . . ISELPDH. VFLRILE. . . . . FM.NT. . . . . RDAVRL  
lcl|Glyma.18G164400\_4-43 . . . . . ISSLPDT. LLCHILS. . . . . FL.PT. . . . . IESVAT  
lcl|Glyma.08G351300\_7-40 . . . . . ISSLPDT. LLCHILS. . . . . FL.PT. . . . . KEAIAAT  
lcl|Glyma.18G164500\_7-43 . . . . . ISSLPNE. LLCHILS. . . . . FL.PT. . . . . KQAVAT  
lcl|Glyma.13G353900\_4-42 . . . . . FSSLTES. VLYILS. . . . . FL.PT. . . . . KDAVAT  
lcl|Glyma.18G164300\_4-42 . . . . . ISNLPDV. VLSHILS. . . . . LV.PT. . . . . NVAVAT  
lcl|Glyma.08G351400\_4-43 . . . . . ISNLPDA. VLSHILS. . . . . FL.PT. . . . . KQAVAT  
lcl|Glyma.18G164600\_21-53 . . . . . ISHLPDV. LLLQILS. . . . . LL.PT. . . . . KQAVIT  
lcl|Glyma.12G103400\_25-61 . . . . . ISDLPDA. VLLHILF. . . . . LL.PI. . . . . K.CVAQM  
lcl|Glyma.13G283500\_19-52 . . . . . STLPDS. VLVSILS. . . . . LL.PC. . . . . NEGVRT  
lcl|Glyma.15G241900\_46-76 . . . . . SYLPEV. IIGRILF. . . . . FL.PN. . . . . KVAVRT  
lcl|Glyma.15G241800\_37-67 . . . . . SYLPEV. IIGRILF. . . . . FL.PN. . . . . KDAVRT  
lcl|Glyma.15G241500\_46-77 . . . . . ISYLSDV. IIGRILF. . . . . FL.PN. . . . . KDVVRT  
lcl|Glyma.13G262900\_18-55 . . . . . FSDLPDV. IIGRILS. . . . . IL.PT. . . . . KEAVRT  
lcl|Glyma.17G193700\_22-57 . . . . . ISNLPDF. IIGLILS. . . . . LL.PT. . . . . KDAVRT  
lcl|Glyma.15G242400\_9-60 . . . . . LPPEQTVVEGEGISKLHES. IILGKILS. . . . . FL.PT. . . . . TDAVHT  
lcl|Glyma.15G242200\_29-66 . . . . . SKLHES. IILGHILS. . . . . FL.PT. . . . . MESVHT  
lcl|Glyma.15G242000\_23-61 . . . . . SQIHDS. IILGHILS. . . . . FL.PT. . . . . MEAVQT  
lcl|Glyma.13G262800\_23-60 . . . . . SQIHDS. IILGHILS. . . . . FL.PT. . . . . MEAVQT  
lcl|Glyma.20G142600\_29-63 . . . . . GNLPE. IIOHILS. . . . . LL.PT. . . . . KDAVKT  
lcl|Glyma.15G022500\_46-82 . . . . . ISQFPDH. VHHILS. . . . . HLRNV. . . . . NDAVRT  
lcl|Glyma.08G192100\_57-96 . . . . . LSDMPDC. IHHILS. . . . . FM.ET. . . . . KDAVQT  
lcl|Glyma.13G278200\_43-78 . . . . . ISSLPDE. IICHILS. . . . . FL.PT. . . . . IEAVTT  
lcl|Glyma.07G072400\_15-54 . . . . . ISELPDD. VVYHILS. . . . . FL.TI. . . . . KEAIAAT  
lcl|Glyma.08G348900\_6-44 . . . . . ISALPDE. VLGHILS. . . . . FL.ST. . . . . QEAIST  
lcl|Glyma.20G098700\_4-40 . . . . . FSNLPDE. VLSIVS. . . . . FL.PN. . . . . ESALET  
lcl|Glyma.10G290500\_5-34 . . . . . SNLPDE. ILSIVS. . . . . FL.P. . . . . LET  
lcl|Glyma.18G286800\_5-41 . . . . . FSNLPDQ. ILCRIVS. . . . . FL.PN. . . . . ESSLET  
lcl|Glyma.02G094600\_5-41 . . . . . FSNLPDE. ILCRIVS. . . . . FL.PN. . . . . ESSLET  
lcl|Glyma.02G127700\_9-44 . . . . . ISDLPQS. IIESILV. . . . . QL.PI. . . . . RDAVRT  
lcl|Glyma.01G072000\_9-46 . . . . . ISDLPQS. IIESILV. . . . . QL.PI. . . . . RDAVRT  
lcl|Glyma.02G127100\_16-54 . . . . . ISDLPDS. LIDFILQ. . . . . RL.QL. . . . . QDVVRT  
lcl|Glyma.02G126900\_16-55 . . . . . ISDLPDS. LIDFILQ. . . . . RL.PL. . . . . QDVVRT  
lcl|Glyma.17G247500\_18-51 . . . . . ISCLPGH. VIDQVLS. . . . . HL.SI. . . . . REAVRT  
lcl|Glyma.17G128800\_29-62 . . . . . NKLPDG. IIPVILS. . . . . KL.PI. . . . . NEAVRT  
lcl|Glyma.12G068200\_27-62 . . . . . STMPDD. IILGILS. . . . . RL.TL. . . . . KEAART  
lcl|Glyma.08G195600\_6-40 . . . . . STLPKT. IILHDILS. . . . . RM.PE. . . . . EDVVRT  
lcl|Glyma.08G195400\_12-48 . . . . . ENLPDI. VILHDILS. . . . . RL.PE. . . . . KDAART  
lcl|Glyma.13G261600\_7-44 . . . . . SNLPDE. IKTNILS. . . . . KL.CI. . . . . DEAVRC  
lcl|Glyma.09G102300\_7-43 . . . . . LSSLPEL. LCLFIS. . . . . LL.PF. . . . . KDAVRT  
lcl|Glyma.08G312700\_7-45 . . . . . LSSLPEL. LCLFIS. . . . . LL.PF. . . . . KDAVRT  
lcl|Glyma.17G194900\_31-63 . . . . . LSKLPEP. LVSHILS. . . . . FL.PT. . . . . KDAVRT  
lcl|Glyma.10G200400\_12-47 . . . . . LLPEI. VLIIVS. . . . . FL.PF. . . . . KEAVRT

|                             |               |           |       |           |             |            |
|-----------------------------|---------------|-----------|-------|-----------|-------------|------------|
| lcl Glyma.02G289100_7-44    | .....FCLLP    | IVVLTILS  | ..LJ  | ..PF      | .....KEVV   | RT         |
| lcl Glyma.02G289200_6-45    | .....ISSLP    | ILMTIVS   | ..L   | ..PF      | .....KESM   | RA         |
| lcl Glyma.06G120600_42-76   | .....KDIPV    | ELMQILS   | ..L   | ..VDD     | .....QTV    | IA         |
| lcl Glyma.04G242700_1-26    | .....QILS     | ..L       | ..VDD | .....QTV  | IA          |            |
| lcl Glyma.13G036600_43-77   | .....KDIPV    | ELMQILS   | ..L   | ..VDD     | .....QTV    | IA         |
| lcl Glyma.12G088900_2-39    | .....QLPVE    | VIGNILS   | ..H   | ..RAA     | .....RDV    | IA         |
| lcl Glyma.15G081900_5-39    | .....SNLPH    | LLSRIVS   | ..G   | ..L       | .....IDF    | LSF        |
| lcl Glyma.13G230700_4-39    | .....WSNLPR   | DVLSQIVS  | ..G   | ..L       | .....IDF    | LSF        |
| lcl Glyma.04G019900_5-47    | .....GELPPE   | LEESISK   | ..T   | ..TIY     | .....VDY    | LR         |
| lcl Glyma.09G116200_72-107  | .....WSSLPR   | GILVEMVAE | ..R   | ..TF      | .....IDC    | LSI        |
| lcl Glyma.10G154000_52-81   | .....LPI      | ILRLIFD   | ..N   | ..PI      | .....PDL    | ARA        |
| lcl Glyma.08G356100_5-44    | .....TNLST    | LIELILS   | ..L   | ..PI      | .....PTL    | IRA        |
| lcl Glyma.13G154400_35-73   | .....WSDLPTE  | LELILS    | ..R   | ..SL      | .....DDN    | VRA        |
| lcl Glyma.06G213000_16-54   | .....LLPQE    | LIQNI     | ..F   | ..L       | .....PET    | IRL        |
| lcl Glyma.04G150400_60-99   | .....LLPQE    | LIQNI     | ..F   | ..L       | .....PET    | IRL        |
| lcl Glyma.18G227100_18-56   | .....KILM     | ..S       | ..LDD | .....LAD  | LVRA        |            |
| lcl Glyma.16G197900_17-58   | .....MSIK     | ILIT      | ..H   | ..DD      | .....PCD    | LIRV       |
| lcl Glyma.14G044300_96-140  | .....ITDLPPA  | LISEILN   | ..C   | ..L       | .....PKD    | LVV        |
| lcl Glyma.02G273700_95-139  | .....ITDLPPA  | LISEILN   | ..C   | ..L       | .....PKD    | LVV        |
| lcl Glyma.15G046900_4-35    | .....PDA      | ILQYILS   | ..R   | ..INN     | .....ARD    | VAA        |
| lcl Glyma.08G185900_4-35    | .....PDA      | ILQYILS   | ..H   | ..INN     | .....ARD    | VAA        |
| lcl Glyma.08G127900_2-36    | .....SLPDA    | ILQCILS   | ..R   | ..ITN     | .....ARD    | VSS        |
| lcl Glyma.05G169600_2-36    | .....SMPDA    | ILQCILS   | ..R   | ..ITN     | .....ARD    | VSS        |
| lcl Glyma.13G164200_19-62   | .....LPDE     | ILCSILE   | ..G   | ..L       | .....PRD    | AARV       |
| lcl Glyma.06G101600_19-63   | .....LPDE     | ILCSILE   | ..R   | ..L       | .....PRD    | AARV       |
| lcl Glyma.12G051100_14-48   | .....LKG      | ..K       | ..L   | ..G       | .....AQD    | IARV       |
| lcl Glyma.15G092600_22-56   | .....RLPDS    | LLLVFN    | ..K   | ..IGD     | .....VKA    | LGR        |
| lcl Glyma.13G219800_25-59   | .....RLPDS    | LLLVFN    | ..K   | ..IGD     | .....VKA    | LGR        |
| lcl Glyma.17G251700_4-43    | .....DLPEG    | CIAKILS   | ..Y   | ..T       | .....TPV    | ACRL       |
| lcl Glyma.14G073300_3-44    | .....QDPEG    | CIAKILS   | ..Y   | ..T       | .....TPV    | ACRL       |
| lcl Glyma.20G220300_18-63   | .....INLLPEG  | CISYILS   | ..Y   | ..T       | .....TPV    | ACRL       |
| lcl Glyma.20G220200_12-43   | .....KILS     | ..Y       | ..T   | .....TRAD | VCR         |            |
| lcl Glyma.10G169300_5-46    | .....LPEG     | CVAHILS   | ..Y   | ..IC      | .....TPED   | IVRL       |
| lcl Glyma.10G169600_3-46    | .....QGLPEG   | CIASILS   | ..R   | ..T       | .....TPAD   | VCRF       |
| lcl Glyma.20G220100_9-52    | .....NNLPEG   | CIANILS   | ..F   | ..T       | .....SPRD   | VCR        |
| lcl Glyma.10G169700_11-37   | .....CMVNL    | ILS       | ..F   | ..T       | .....SPRD   | VRR        |
| lcl Glyma.03G233900_4-44    | .....PYD      | CFAHILS   | ..F   | ..T       | .....STQD   | VCRS       |
| lcl Glyma.03G253900_24-65   | .....HLPEG    | CIANIVS   | ..F   | ..T       | .....TPPD   | ACV        |
| lcl Glyma.19G231000_9-54    | .....NIESLPHD | CVSEILS   | ..H   | ..T       | .....SPLV   | ACV        |
| lcl Glyma.03G233800_10-55   | .....NIESLPHD | CVSEILS   | ..H   | ..T       | .....SPLV   | ACV        |
| lcl Glyma.10G150400_4-45    | .....PED      | CVSKILS   | ..Y   | ..T       | .....SPPD   | ACRF       |
| lcl Glyma.06G271000_8-48    | .....PEE      | CVATILS   | ..L   | ..T       | .....SAKD   | ACQL       |
| lcl Glyma.06G270800_8-48    | .....PEE      | CVATILS   | ..L   | ..T       | .....SAKD   | ACQL       |
| lcl Glyma.06G271100_7-47    | .....PEE      | CISMIVS   | ..F   | ..T       | .....SPED   | ACRL       |
| lcl Glyma.13G064500_14-60   | .....ITDLNED  | CIHACAG   | ..H   | ..L       | .....SLGD   | VN         |
| lcl Glyma.17G131400_23-62   | .....LPES     | CVAQIMT   | ..Y   | ..M       | .....DPPD   | ICKL       |
| lcl Glyma.05G049400_78-117  | .....LPES     | CVAQIMT   | ..Y   | ..M       | .....DPPD   | ICKL       |
| lcl Glyma.07G077600_23-55   | .....IPES     | CVAVLIM   | ..Y   | ..L       | .....DPPD   | ICKL       |
| lcl Glyma.03G017000_23-61   | .....IPES     | CVAVLIM   | ..Y   | ..L       | .....DPPD   | ICKL       |
| lcl Glyma.13G149600_18-56   | .....IPES     | CVACVFL   | ..H   | ..L       | .....TPPE   | ICNL       |
| lcl Glyma.10G064800_18-56   | .....IPES     | CVACVFL   | ..H   | ..L       | .....TPPE   | ICNL       |
| lcl Glyma.03G189500_21-61   | .....IPEN     | CVARVFL   | ..H   | ..L       | .....TPPE   | ICNL       |
| lcl Glyma.10G238700_32-71   | .....IPES     | CISSLFM   | ..N   | ..L       | .....DPPD   | ICKL       |
| lcl Glyma.09G145700_29-67   | .....PEN      | CISSMMM   | ..N   | ..F       | .....DPQE   | ICSL       |
| lcl Glyma.17G022900_12-56   | .....SSLPED   | VALKIAS   | ..L   | ..L       | .....QVRD   | L          |
| lcl Glyma.07G251400_13-56   | .....SLPED    | VALKIAS   | ..L   | ..L       | .....QVRD   | L          |
| lcl Glyma.16G123900_129-161 | .....SLPMD    | LLVKILC   | ..H   | ..L       | .....HHDG   | LRAV       |
| lcl Glyma.02G045900_131-163 | .....SLPMD    | LLVKILC   | ..H   | ..L       | .....HHDG   | LRAV       |
| lcl Glyma.13G246200_46-82   | .....LLDALPQD | VLVQVLC   | ..G   | ..V       | .....DHED   | LKQL       |
| lcl Glyma.07G190100_53-90   | .....RLEALPLD | VLRVLC    | ..G   | ..V       | .....DHED   | LEQL       |
| lcl Glyma.20G135900_323-367 | .....FTRLPME  | LKLLILE   | ..R   | ..L       | .....LPGV   | LAKV       |
| lcl Glyma.10G255600_327-371 | .....FMRLPME  | LKLLILE   | ..R   | ..L       | .....LPGV   | LAKV       |
| lcl Glyma.19G154800_16-53   | .....FYDIFR   | ..R       | ..L   | ..G       | .....LDGAT  | LASA       |
| lcl Glyma.03G152300_16-53   | .....FYDIFR   | ..R       | ..L   | ..G       | .....LDGAT  | LASA       |
| lcl Glyma.10G025700_15-53   | .....LLYDILR  | ..R       | ..L   | ..G       | .....LDGPT  | LASA       |
| lcl Glyma.02G148100_28-63   | .....DILR     | ..R       | ..L   | ..G       | .....LDGPT  | LASA       |
| lcl Glyma.13G314700_20-55   | .....HILN     | ..R       | ..L   | ..G       | .....LDGPT  | LASA       |
| lcl Glyma.11G181200_32-69   | .....AHILT    | ..R       | ..L   | ..G       | .....LDGAT  | LASA       |
| lcl Glyma.10G075800_22-60   | .....DI       | IQTHILT   | ..R   | ..L       | .....LPGPA  | LASA       |
| lcl Glyma.03G198600_27-68   | .....DI       | IQTHILT   | ..C   | ..L       | .....LDGRA  | LASV       |
| lcl Glyma.17G062000_214-251 | .....LKILA    | ..R       | ..L   | ..G       | .....LTPRD  | LASV       |
| lcl Glyma.13G097600_214-251 | .....LKILA    | ..Q       | ..L   | ..G       | .....LTPRD  | LASV       |
| lcl Glyma.09G056100_208-245 | .....LKILA    | ..R       | ..L   | ..G       | .....LTPRD  | LASV       |
| lcl Glyma.08G046500_233-272 | .....ILQISDEV | LAHNILS   | ..R   | ..L       | .....LTPRD  | VASI       |
| lcl Glyma.05G239400_207-245 | .....LQISDEV  | LAHNILS   | ..R   | ..L       | .....LTPRD  | VASI       |
| lcl Glyma.11G090700_79-123  | .....QIPPE    | LFNHILK   | ..F   | ..L       | .....LSSD   | LVSC       |
| lcl Glyma.01G154100_79-123  | .....QIPPE    | LFNHILK   | ..F   | ..L       | .....LSSD   | LVSC       |
| lcl Glyma.19G119400_4-54    | .....LLPDE    | LWRRILE   | ..I   | ..GIES    | .....N      | GFSYKDLCCV |
| lcl Glyma.08G002000_12-56   | .....LCLPDD   | VFGMVS    | ..F   | ..L       | .....LLPRD  | V          |
| lcl Glyma.05G194000_12-56   | .....LCLPDD   | VFGMVS    | ..F   | ..L       | .....LLPRD  | V          |
| lcl Glyma.06G155700_5-46    | .....PDD      | VFAIVSR   | ..F   | ..L       | .....MSPRD  | V          |
| lcl Glyma.18G006600_20-60   | .....SLPDD    | LVLSILC   | ..K   | ..LSST    | .....ATSP   | SDFISV     |
| lcl Glyma.11G250600_31-71   | .....SLPDD    | LVLSILC   | ..K   | ..LSST    | .....ATSP   | SDFISV     |
| lcl Glyma.08G104400_65-106  | .....SLPDD    | LVLSIFC   | ..K   | ..LSST    | .....ATKPSD | FVNV       |
| lcl Glyma.05G147400_69-110  | .....SLPDD    | LVLSIFC   | ..K   | ..LSST    | .....ATKPSD | FVNI       |
| lcl Glyma.04G195700_16-55   | .....CLPDD    | LLVLILS   | ..K   | ..LSST    | .....ASSP   | SDFINI     |
| lcl Glyma.11G154800_241-282 | .....ELSD     | ILTKILA   | ..S   | ..LG      | .....PMD    | LTRV       |
| lcl Glyma.04G138300_237-278 | .....ELSD     | ILTKILA   | ..S   | ..LG      | .....PMD    | LTRV       |
| lcl Glyma.20G042200_86-132  | .....SVLDLPEL | ALDCILE   | ..R   | ..L       | .....LPPS   | L          |
| lcl Glyma.07G235500_86-132  | .....SVLDLPEL | ALDCILE   | ..R   | ..L       | .....LPPS   | L          |
| lcl Glyma.14G036300_85-130  | .....SVLDLPEL | VLECI     | ..K   | ..L       | .....LPPS   | L          |
| lcl Glyma.02G278300_85-130  | .....SVLDLPEL | VLECI     | ..K   | ..L       | .....LPPS   | L          |
| lcl Glyma.19G129600_88-132  | .....LLDLPDL  | PLECI     | ..H   | ..L       | .....LSPAE  | L          |
| lcl Glyma.03G126600_90-134  | .....LLDLPDL  | PLECI     | ..H   | ..L       | .....LSPAE  | L          |
| lcl Glyma.03G126700_21-66   | .....LLDLPDW  | TLDLILE   | ..C   | ..L       | .....LPPQD  | L          |
| lcl Glyma.03G126900_1-44    | .....SLLNLP   | ILDCILK   | ..L   | ..L       | .....LSPME  | L          |
| lcl Glyma.03G126800_1-45    | .....SLLNLPY  | ILDCILK   | ..L   | ..L       | .....LSPME  | L          |
| lcl Glyma.19G129700_11-53   | .....LFNLQEP  | VLDLILK   | ..L   | ..L       | .....LSPMG  | L          |
| lcl Glyma.10G102300_11-56   | .....LLDLPEP  | TLDLILK   | ..C   | ..L       | .....FSPNE  | L          |
| lcl Glyma.19G077200_211-253 | .....HD       | ALFFVLG   | ..Y   | ..L       | .....LGVRD  | L          |
| lcl Glyma.05G073500_216-258 | .....HD       | ALFFVLG   | ..Y   | ..L       | .....LGVRD  | L          |
| lcl Glyma.08G101200_189-221 | .....Y        | ..L       | ..G   | ..L       | .....LGLSD  | L          |
| lcl Glyma.05G144800_201-233 | .....Y        | ..L       | ..G   | ..L       | .....LGLSD  | L          |



|                             |                                |                                 |          |           |
|-----------------------------|--------------------------------|---------------------------------|----------|-----------|
| lc1 Glyma.08G043200_22-57   | HE                             | AMFLVLA                         | Y        | LPVYEVVVM |
| lc1 Glyma.05G235800_20-55   | HE                             | ALFLVLS                         | Y        | LPVYEVVVM |
| lc1 Glyma.18G253400_43-88   | CLPDD                          | TVIQLLS                         | C        | LSYRDRASL |
| lc1 Glyma.09G242200_43-88   | CLPDD                          | TVIQLLS                         | C        | LSYQDRASL |
| lc1 Glyma.08G221300_34-71   |                                | FTILL                           |          | LPIDA     |
| lc1 Glyma.07G020700_29-66   |                                | FTILL                           |          | LPIDA     |
| lc1 Glyma.06G132400_2-45    | RLPLE                          | ICMKIFY                         | L        | LDYQH     |
| lc1 Glyma.04G232600_3-45    | LPLE                           | ICMKIFC                         | L        | LDYQH     |
| lc1 Glyma.14G009200_85-113  |                                |                                 |          | ALAIL     |
| lc1 Glyma.16G096700_44-84   | PAD                            | ILMQIVR                         | L        | LGPKH     |
| lc1 Glyma.04G112600_47-88   | LPSD                           | ILMHILR                         | L        | LGPKE     |
| lc1 Glyma.14G179500_64-91   |                                | LENVLH                          | F        | SRRDRNAA  |
| lc1 Glyma.02G211800_64-91   |                                | LENVLH                          | F        | SRRDRNAA  |
| lc1 Glyma.06G095400_17-52   | PEQVLEN                        | VLESVLH                         | F        | SRRDRNAA  |
| lc1 Glyma.04G093500_13-48   | PDQVLEN                        | VLESVLH                         | F        | SRRDRNAA  |
| lc1 Glyma.19G206800_11-41   | EE                             | VLEHVFS                         | F        | NERDRNAI  |
| lc1 Glyma.19G100200_4-36    | FPDE                           | VIHIFD                          | Y        | SHSDRNAL  |
| lc1 Glyma.16G050500_4-36    | FPDE                           | VIHIFD                          | Y        | SHSDRNAL  |
| lc1 Glyma.02G065300_5-35    | DE                             | VIHIFD                          | Y        | SQRDRNDL  |
| lc1 Glyma.12G128600_9-41    | LPEE                           | ILNVVFS                         | AVS      | DTRFRNAL  |
| lc1 Glyma.08G216300_8-40    | EE                             | CWELVFR                         | F        | HGRHLES   |
| lc1 Glyma.07G026200_6-40    | LPEE                           | CWELVFR                         | F        | HGRHLES   |
| lc1 Glyma.19G068600_7-36    | E                              | LLQELQ                          | K        | SSSS      |
| lc1 Glyma.16G071200_7-36    | E                              | LLQEIFQ                         | K        | SSSS      |
| lc1 Glyma.17G019800_12-42   | DE                             | LIVEIFS                         | R        | SKSTRDAC  |
| lc1 Glyma.07G254400_12-42   | DD                             | LIVEIFS                         | R        | SMSTRDAC  |
| lc1 Glyma.15G101100_11-42   | PDE                            | LLTEIFR                         | R        | SKSSRDAG  |
| lc1 Glyma.13G211600_11-42   | PDE                            | LLTEIFR                         | R        | SKSNRDAS  |
| lc1 Glyma.06G318100_54-84   | E                              | LLRRLS                          | K        | SSQORNSN  |
| lc1 Glyma.04G120000_114-144 | E                              | LLRRLS                          | K        | SSQORNSN  |
| lc1 Glyma.09G229800_64-94   | E                              | LLLKI                           | I        | SSTORNSN  |
| lc1 Glyma.11G227300_23-43   |                                |                                 |          | DPKDRDAV  |
| lc1 Glyma.02G254300_17-37   |                                |                                 |          | DSKDRDAV  |
| lc1 Glyma.15G004900_2-35    | NIPHE                          | IWWEILS                         | R        | KTSDRNSV  |
| lc1 Glyma.08G059500_18-48   | DE                             | VLERISG                         | M        | SRKDKSTV  |
| lc1 Glyma.07G189800_17-46   | DE                             | VLERILG                         | M        | SRKDKSTV  |
| lc1 Glyma.14G136200_20-60   | D                              | VHLILG                          | R        | RQEDKEVF  |
| lc1 Glyma.17G167800_40-72   | DIPDE                          | CLAGIFQ                         | F        | S.VDRKTC  |
| lc1 Glyma.05G097100_59-91   | DIPDE                          | CLAGIFQ                         | F        | S.VDRKTC  |
| lc1 Glyma.17G238700_64-96   | SDLPNE                         | CLASVFQ                         | F        | S.ADRSRC  |
| lc1 Glyma.11G052600_36-77   | RLSDD                          | CLAAIFH                         | F        | T.ADRKRC  |
| lc1 Glyma.01G189600_36-77   | RLSDD                          | CLAAIFH                         | F        | T.ADRKRC  |
| lc1 Glyma.06G042800_9-51    | DDIPDN                         | CLACIFQ                         | L        | P.ADQKKL  |
| lc1 Glyma.04G041800_24-67   | DEIPDE                         | CLGCIHQ                         | L        | P.GERKMF  |
| lc1 Glyma.07G060100_13-46   | HLPDD                          | CLVIFH                          | G        | SRIDRDSF  |
| lc1 Glyma.17G211000_69-101  | LPDE                           | CLFEIFR                         | R        | SGEDRSAC  |
| lc1 Glyma.14G116800_66-106  | IEALPDE                        | CLFEIFR                         | R        | AGEDRSAC  |
| lc1 Glyma.06G068400_68-108  | IESLPDE                        | CLFEILR                         | R        | AGQDRSVC  |
| lc1 Glyma.04G066900_66-109  | IESLPDE                        | CLFEILR                         | R        | AGQDRSVC  |
| lc1 Glyma.13G166200_66-97   | VLPDE                          | CLFEIFR                         | R        | SGKERSSC  |
| lc1 Glyma.04G147000_69-100  | VLPDE                          | CLFEVFR                         | W        | SGKERSSC  |
| lc1 Glyma.17G026300_26-71   | FLPKE                          | LOVEIFA                         | K        | SVFDHMI   |
| lc1 Glyma.07G247800_23-68   | SLPKE                          | LOVEIFA                         | K        | SIFDHMI   |
| lc1 Glyma.02G238900_22-70   | LSLPSD                         | LLEETIA                         | K        | SSIDLVNI  |
| lc1 Glyma.20G105000_9-46    | DQLPSA                         | LVAITMS                         | K        | ASITCSL   |
| lc1 Glyma.17G035100_46-127  | EVPMNSSSTISDTLYANRSEDATISLVEEG | LKETLLPSDKIPSEKVIDEVGIVSIKCLYAY |          |           |
| lc1 Glyma.13G246100_26-61   | ELPLE                          | ILLHVFS                         | F        | KVAQN     |
| lc1 Glyma.07G162700_19-49   | LTIVQ                          | VRRKLI                          | E        | DWLPV     |
| lc1 Glyma.03G214300_17-57   | D                              | IVLNI                           | F        | PRHWARL   |
| lc1 Glyma.13G353900_191-234 | CVPKC                          | ISSHLR                          | TCCVYKYG | GYETVFEF  |
| lc1 Glyma.07G111600_14-69   | NKVDKKSQNEANK                  | VENIID                          | LPMN     | IVRKNNI   |
| lc1 Glyma.01G094300_169-235 | RKERGENNFKSFANN                | IYEWNI                          | DAQMEYN  | IMNTLQHM  |









1c1|Glyma.02G289100\_7-44  
1c1|Glyma.02G289200\_6-45  
1c1|Glyma.06G120600\_42-76  
1c1|Glyma.04G242700\_1-26  
1c1|Glyma.13G036600\_43-77  
1c1|Glyma.12G088900\_2-39  
1c1|Glyma.15G081900\_5-39  
1c1|Glyma.13G230700\_4-39  
1c1|Glyma.04G019900\_5-47  
1c1|Glyma.09G116200\_72-107  
1c1|Glyma.10G154000\_52-81  
1c1|Glyma.08G356100\_5-44  
1c1|Glyma.13G154400\_35-73  
1c1|Glyma.06G213000\_16-54  
1c1|Glyma.04G150400\_60-99  
1c1|Glyma.18G227100\_18-56  
1c1|Glyma.16G197900\_17-58  
1c1|Glyma.14G044300\_96-140  
1c1|Glyma.02G273700\_95-139  
1c1|Glyma.15G046900\_4-35  
1c1|Glyma.08G185900\_4-35  
1c1|Glyma.08G127900\_2-36  
1c1|Glyma.05G169600\_2-36  
1c1|Glyma.13G164200\_19-62  
1c1|Glyma.06G101600\_19-63  
1c1|Glyma.12G051100\_14-48  
1c1|Glyma.15G092600\_22-56  
1c1|Glyma.13G219800\_25-59  
1c1|Glyma.17G251700\_4-43  
1c1|Glyma.14G073300\_3-44  
1c1|Glyma.20G220300\_18-63  
1c1|Glyma.20G220200\_12-43  
1c1|Glyma.10G169300\_5-46  
1c1|Glyma.10G169600\_3-46  
1c1|Glyma.20G220100\_9-52  
1c1|Glyma.10G169700\_11-37  
1c1|Glyma.03G233900\_4-44  
1c1|Glyma.03G253900\_24-65  
1c1|Glyma.19G231000\_9-54  
1c1|Glyma.03G233800\_10-55  
1c1|Glyma.10G150400\_4-45  
1c1|Glyma.06G271000\_8-48  
1c1|Glyma.06G270800\_8-48  
1c1|Glyma.06G271100\_7-47  
1c1|Glyma.13G064500\_14-60  
1c1|Glyma.17G131400\_23-62  
1c1|Glyma.05G049400\_78-117  
1c1|Glyma.07G077600\_23-55  
1c1|Glyma.03G017000\_23-61  
1c1|Glyma.13G149600\_18-56  
1c1|Glyma.10G064800\_18-56  
1c1|Glyma.03G189500\_21-61  
1c1|Glyma.10G238700\_32-71  
1c1|Glyma.09G145700\_29-67  
1c1|Glyma.17G022900\_12-56  
1c1|Glyma.07G251400\_13-56  
1c1|Glyma.16G123900\_129-161  
1c1|Glyma.02G045900\_131-163  
1c1|Glyma.13G246200\_46-82  
1c1|Glyma.07G190100\_53-90  
1c1|Glyma.20G135900\_323-367  
1c1|Glyma.10G255600\_327-371  
1c1|Glyma.19G154800\_16-53  
1c1|Glyma.03G152300\_16-53  
1c1|Glyma.10G025700\_15-53  
1c1|Glyma.02G148100\_28-63  
1c1|Glyma.13G314700\_20-55  
1c1|Glyma.11G181200\_32-69  
1c1|Glyma.10G075800\_22-60  
1c1|Glyma.03G198600\_27-68  
1c1|Glyma.17G062000\_214-251  
1c1|Glyma.13G097600\_214-251  
1c1|Glyma.09G056100\_208-245  
1c1|Glyma.08G046500\_233-272  
1c1|Glyma.05G239400\_207-245  
1c1|Glyma.11G090700\_79-123  
1c1|Glyma.01G154100\_79-123  
1c1|Glyma.19G119400\_4-54  
1c1|Glyma.08G002000\_12-56  
1c1|Glyma.05G194000\_12-56  
1c1|Glyma.06G155700\_5-46  
1c1|Glyma.18G006600\_20-60  
1c1|Glyma.11G250600\_31-71  
1c1|Glyma.08G104400\_65-106  
1c1|Glyma.05G147400\_69-110  
1c1|Glyma.04G195700\_16-55  
1c1|Glyma.11G154800\_241-282  
1c1|Glyma.04G138300\_237-278  
1c1|Glyma.20G042200\_86-132  
1c1|Glyma.07G235500\_86-132  
1c1|Glyma.14G036300\_85-130  
1c1|Glyma.02G278300\_85-130  
1c1|Glyma.19G129600\_88-132  
1c1|Glyma.03G126600\_90-134  
1c1|Glyma.03G126700\_21-66  
1c1|Glyma.03G126900\_1-44  
1c1|Glyma.03G126800\_1-45  
1c1|Glyma.19G129700\_11-53  
1c1|Glyma.10G102300\_11-56  
1c1|Glyma.19G077200\_211-253  
1c1|Glyma.05G073500\_216-258  
1c1|Glyma.08G101200\_189-221  
1c1|Glyma.05G144800\_201-233

CVLSKDWLDI CKS . . . . .  
SIISSKWLKACKLTK . . . . .  
SGVCRGWRDAI . . . . .  
SGVCRGWRDAI . . . . .  
SEVCRGWREAI . . . . .  
SASCRKWRLACCCKH . . . . .  
RGVCKDWR . . . . . VVS . . . . .  
RGVCEWR . . . . . VAS . . . . .  
RSVCRSRRSSVPKIPHL . . . . .  
SKVCTSWN . . . . . RVL . . . . .  
SCVCRLLWNSVAS . . . . .  
STVCKLWHSI . . . . . ISSSSF . . . . .  
SVVCKRWHSVATSV . . . . .  
KLLNKSFSRI . . . . . ISDNF . . . . .  
KLVNKSFSRI . . . . . ISDHAF . . . . .  
TCVRSRWRDI . . . . . VIANGLCCKQLCLR . . . . .  
SSVSSSRRHFV . . . . . VIEHGLCKQLCLK . . . . .  
SCVSPILQRV . . . . . ASEHHAWKQF . . . . .  
SCVSTIFORV . . . . . ASEHGAWKQF . . . . .  
NCVSKR . . . . . WKDS . . . . .  
NCVSKR . . . . . WKDS . . . . .  
NCVSKR . . . . . WKDST . . . . .  
NCVSKR . . . . . WKDST . . . . .  
ACVIGVMYIL . . . . . YNEDPLWMSLCR . . . . .  
SCVSSVMYIL . . . . . CNEDPLWMSLCR . . . . .  
ACVSKRFRSS . . . . . ASDDTLWINLCF . . . . .  
CVVSRFRHSLV . . . . .  
CVVSRFRHSLV . . . . .  
S.VSIAFRSA . . . . . AESDTV . . . . . WD . . . . .  
SLVSKAFRSA . . . . . AESDTV . . . . . WD . . . . .  
SLVSKAFRSA . . . . . AQSDTL . . . . . WDRFI . . . . .  
SLVSKAFRSA . . . . . AEANTV . . . . . W . . . . .  
SLVSKAFYSA . . . . . ADYDTV . . . . . WDR . . . . .  
SVVSKIFRSA . . . . . AESDAV . . . . . WKRF . . . . .  
SLSSSTFRSA . . . . . AQSDAV . . . . . WNK . . . . .  
SLVSSIFRS . . . . .  
SLVSSIVQSM . . . . . ADSDAV . . . . . WEKF . . . . .  
SLVSSSFRSA . . . . . SVTDFV . . . . . WER . . . . .  
SLVSPSLCSC . . . . . ANSDTV . . . . . WRSF . . . . .  
SLVSPTLRSC . . . . . ANSDTV . . . . . WRSF . . . . .  
SMVSSTLRSC . . . . . ADSDLL . . . . . WRFFF . . . . .  
SPVSPSLKAI . . . . . ADSDAV . . . . . WANF . . . . .  
SLVSPSFKETI . . . . . ADSDAV . . . . . WANF . . . . .  
SLVSPFFKETI . . . . . ADSDAV . . . . . WENF . . . . .  
AMTSSALKRL . . . . . LAYSDFI . . . . . WQFFR . . . . .  
ATLNRARFGA . . . . . ASSADFV . . . . . WE . . . . .  
ATLNRARFGA . . . . . ASSADFV . . . . . WE . . . . .  
ARLNRARF . . . . . RDAS . . . . .  
ARLNRARF . . . . . RDAS . . . . . ADFI . . . . . W . . . . .  
ARLNRARFGA . . . . . ASSDSV . . . . . W . . . . .  
ARLNRARFGA . . . . . ASSDSV . . . . . W . . . . .  
ARLNRARFGA . . . . . ASSDSV . . . . . WQT . . . . .  
ARVNRARF . . . . . HRAS . . . . . ASSADFV . . . . . WE . . . . .  
ARVNRARF . . . . . HRAS . . . . . ANEFV . . . . . WE . . . . .  
GCCSMFWKEL . . . . . CFSDCI . . . . . WESLV . . . . .  
GCCSRFWREL . . . . . CFSDCI . . . . . WESLV . . . . .  
FHVSQKIRKA . . . . .  
FHVSQKIRKA . . . . .  
FHVSKTIREAT . . . . .  
VRVSKTVREAAE . . . . .  
ACTCSELRYL . . . . . STSNEL . . . . . WKKK . . . . .  
ACTCSELRYL . . . . . STSNEL . . . . . WKKK . . . . .  
ACTCAALCSI . . . . . SKEENL . . . . . WENVC . . . . .  
ACTCAALCSI . . . . . SKEESL . . . . . WENVC . . . . .  
ACTCASFS . . . . . SKEESL . . . . . WENVC . . . . .  
ACTCASFS . . . . . SKEESL . . . . . WENVC . . . . .  
ASSTSHLRRL . . . . . CTEHLL . . . . . WRNIS . . . . .  
ASVSSLMHRL . . . . . CTQDDL . . . . . WREIST . . . . .  
TATCSQLHSL . . . . . SSHDPL . . . . . WLN . . . . .  
ASTCSQLHAL . . . . . SDHEPL . . . . . WENIC . . . . .  
SSVCRRLYEL . . . . . TKNEDL . . . . . WRMVCQ . . . . .  
SSVCRRLYEL . . . . . TKNEDL . . . . . WRMVCQ . . . . .  
GSVCRRLYEL . . . . . TKNEDL . . . . . WRMVCQ . . . . .  
GSVCRRLYEL . . . . . TKNE . . . . .  
GSVCRRLYEL . . . . . TKNE . . . . .  
SLVCRFLNYA . . . . . ASDEAL . . . . . WRRLYC . . . . .  
SLVCRFLNYA . . . . . ASDEAL . . . . . WRRLYC . . . . .  
SISCRRLHRL . . . . . SSEPL . . . . . WNRLF . . . . .  
SLCKKSLYAL . . . . . SSSEKV . . . . . WFPQC . . . . .  
SLCKKSLYAL . . . . . GSSEKV . . . . . WFTQC . . . . .  
CLCKKSLNAL . . . . . VASEKL . . . . . WLTQC . . . . .  
LITCKRLNSL . . . . . GLH . . . . .  
LITCKRLNSL . . . . . GLH . . . . .  
LITCKRLNRL . . . . . ALHS . . . . .  
LITCKRLNRL . . . . . ALHS . . . . .  
LITCKRLNRL . . . . . GL . . . . .  
SATCHHLRSL . . . . . AASVMP . . . . . YTK . . . . .  
SATCHHLRSL . . . . . AASVMP . . . . . YTK . . . . .  
AAVCRRLRER . . . . . CVSDHL . . . . . WEKHM . . . . .  
AAVCRRLRER . . . . . CVSDHL . . . . . WERHM . . . . .  
AGVCRRLRES . . . . . CVSDHL . . . . . WERH . . . . .  
AGVCRRLRES . . . . . CVSDHL . . . . . WERH . . . . .  
ATVCTSLRDR . . . . . CRSDHL . . . . . WKKH . . . . .  
ATVCTSLRDR . . . . . CRSDHL . . . . . WKKH . . . . .  
AQVCTSLRDR . . . . . IRSDAL . . . . . WEKKI . . . . .  
SEVCTCLRDR . . . . . CRSDPL . . . . . WE . . . . .  
SEVCTFLRDR . . . . . CRSDPL . . . . . WEL . . . . .  
PEVCTFFRDR . . . . . CGSDPL . . . . . WE . . . . .  
SEVCTSLKDK . . . . . CQSDHF . . . . . WEHHI . . . . .  
EGVCKSLCDA . . . . . VRGDP . . . . . LLWRTMHI . . . . .  
EGVCKSLCDA . . . . . VRGDP . . . . . LLWRTMHI . . . . .  
ERVCKSLHST . . . . . VRGDP . . . . . LLWRSIH . . . . .  
ERVCKSLHST . . . . . VCGDP . . . . . LLWRSIH . . . . .

lcl|Glyma.08G043200\_22-57 SQVCTSLRDAVNNDIL.....  
lcl|Glyma.05G235800\_20-55 SQVCTSLRDAVNNDIL.....  
lcl|Glyma.18G253400\_43-88 SSTCKTWRSLGSLPCL.WSSLDLR.....  
lcl|Glyma.09G242200\_43-88 SSTCKTWRSLGSSSLCL.WSSLDLR.....  
lcl|Glyma.08G221300\_34-71 SMTCKRFRALSSSHTL.WRSLCK.....  
lcl|Glyma.07G020700\_29-66 SITCKRFRALTSSHTL.WKSLCK.....  
lcl|Glyma.06G132400\_2-45 QQVCRKWKLVASENAL.WSDLF.....  
lcl|Glyma.04G232600\_3-45 QQVCRKWKLVASDNTL.WSNLF.....  
lcl|Glyma.14G009200\_85-113 FQVCSWREVSRSDDL.WQRLTRR.....  
lcl|Glyma.16G096700\_44-84 CLVSKSWRSLVSDNAL.WAHF.....  
lcl|Glyma.04G112600\_47-88 SVVCKALRSLVSDNRL.WIHF.....  
lcl|Glyma.14G179500\_64-91 SLVCRSWYRA.....  
lcl|Glyma.02G211800\_64-91 SLVCRSWYRA.....  
lcl|Glyma.06G095400\_17-52 SLVCKSWYRA.....  
lcl|Glyma.04G093500\_13-48 SLVCKSWYRA.....  
lcl|Glyma.19G206800\_11-41 SLVCKSWYRI.....  
lcl|Glyma.19G100200\_4-36 SLVCKSWYRI.....  
lcl|Glyma.16G050500\_4-36 SLVCKSWYRI.....  
lcl|Glyma.02G065300\_5-35 SLVCKNWHRL.....  
lcl|Glyma.12G128600\_9-41 SLVSWSFYHL.....  
lcl|Glyma.08G216300\_8-40 SLVCKQFLSITN.....  
lcl|Glyma.07G026200\_6-40 SLVCKQFLSITN.....  
lcl|Glyma.19G068600\_7-36 SLVCKRWLRHL.....  
lcl|Glyma.16G071200\_7-36 SLVCKRWLRHL.....  
lcl|Glyma.17G019800\_12-42 SLVCRRWFRLL.....  
lcl|Glyma.07G254400\_12-42 SLVCRRWFRLL.....  
lcl|Glyma.15G101100\_11-42 SLVCTRWRLL.....  
lcl|Glyma.13G211600\_11-42 SLVCTRWRLL.....  
lcl|Glyma.06G318100\_54-84 SLVCKRWLNL.....  
lcl|Glyma.04G120000\_114-144 SLVCKRWLNL.....  
lcl|Glyma.09G229800\_64-94 SLVCKRWLNL.....  
lcl|Glyma.11G227300\_23-43 SQVCRRWYEL.....  
lcl|Glyma.02G254300\_17-37 SQVCRRWYEL.....  
lcl|Glyma.15G004900\_2-35 SLVCKRLLYL.....  
lcl|Glyma.08G059500\_18-48 SLVCKEWFNA.....  
lcl|Glyma.07G189800\_17-46 SLVCKEWFNA.....  
lcl|Glyma.14G136200\_20-60 RLVCKRWLQLLNINIENYFREFC.....  
lcl|Glyma.17G167800\_40-72 SAVCRRWLRV.....  
lcl|Glyma.05G097100\_59-91 SAVCRRWLRV.....  
lcl|Glyma.17G238700\_64-96 SLVCRRWLQ.....  
lcl|Glyma.11G052600\_36-77 SLVCRRWLRV.DGQRRHRLS.....  
lcl|Glyma.01G189600\_36-77 SLVCLRWLRV.DGQRRHRLS.....  
lcl|Glyma.06G042800\_9-51 SLVCRRWLKV.EGHTHRLC.....  
lcl|Glyma.04G041800\_24-67 SLVCSRWLKIEGQTYQRSL.....  
lcl|Glyma.07G060100\_13-46 GLTCRRWLHV.....  
lcl|Glyma.17G211000\_69-101 ACVSKRWLML.....  
lcl|Glyma.14G116800\_66-106 ACVSKRWLML.LSSIC.....  
lcl|Glyma.06G068400\_68-108 ASVSKRWLML.LSSIC.....  
lcl|Glyma.04G066900\_66-109 ASVSKRWLML.LSSICKNE.....  
lcl|Glyma.13G166200\_66-97 ACVSKRWL.....  
lcl|Glyma.04G147000\_69-100 AYVSKRWL.....  
lcl|Glyma.17G026300\_26-71 KLCKEFLRAAEDNYVYRHA.....  
lcl|Glyma.07G247800\_23-68 KLCKEFLRAAEDDYVYRHA.....  
lcl|Glyma.02G238900\_22-70 KLSCKDFLHASEANNVWKNVSL.....  
lcl|Glyma.20G105000\_9-46 ASTSSTFRSCARHI.....  
lcl|Glyma.17G035100\_46-127 ELESSMFPSTESEIAAIDLTLN.....  
lcl|Glyma.13G246100\_26-61 CTQGSKFRNCKQF.....  
lcl|Glyma.07G162700\_19-49 LVVCKDWLANAVD.....  
lcl|Glyma.03G214300\_17-57 ACVCTKFSSSLVRFDFCWKTKC.....  
lcl|Glyma.13G353900\_191-234 ERYIVQNAARLLQDMTI.....  
lcl|Glyma.07G111600\_14-69 SVVSSQCHQRQSRPISLAMDLDLAKK....  
lcl|Glyma.01G094300\_169-235 TMVATAVQTSHECSKETIIDILVTLGSLGQ
