# Supplementary material for: Genome-wide analysis of genes encoding core components of the ubiquitin system in soybean (Glycine max) reveals a potential role for ubiquitination in host immunity against soybean cyst nematode
Source: PubMed Central journal article supplement (PMC6052599; doi:10.1186/s12870-018-1365-7), 2018-07-18

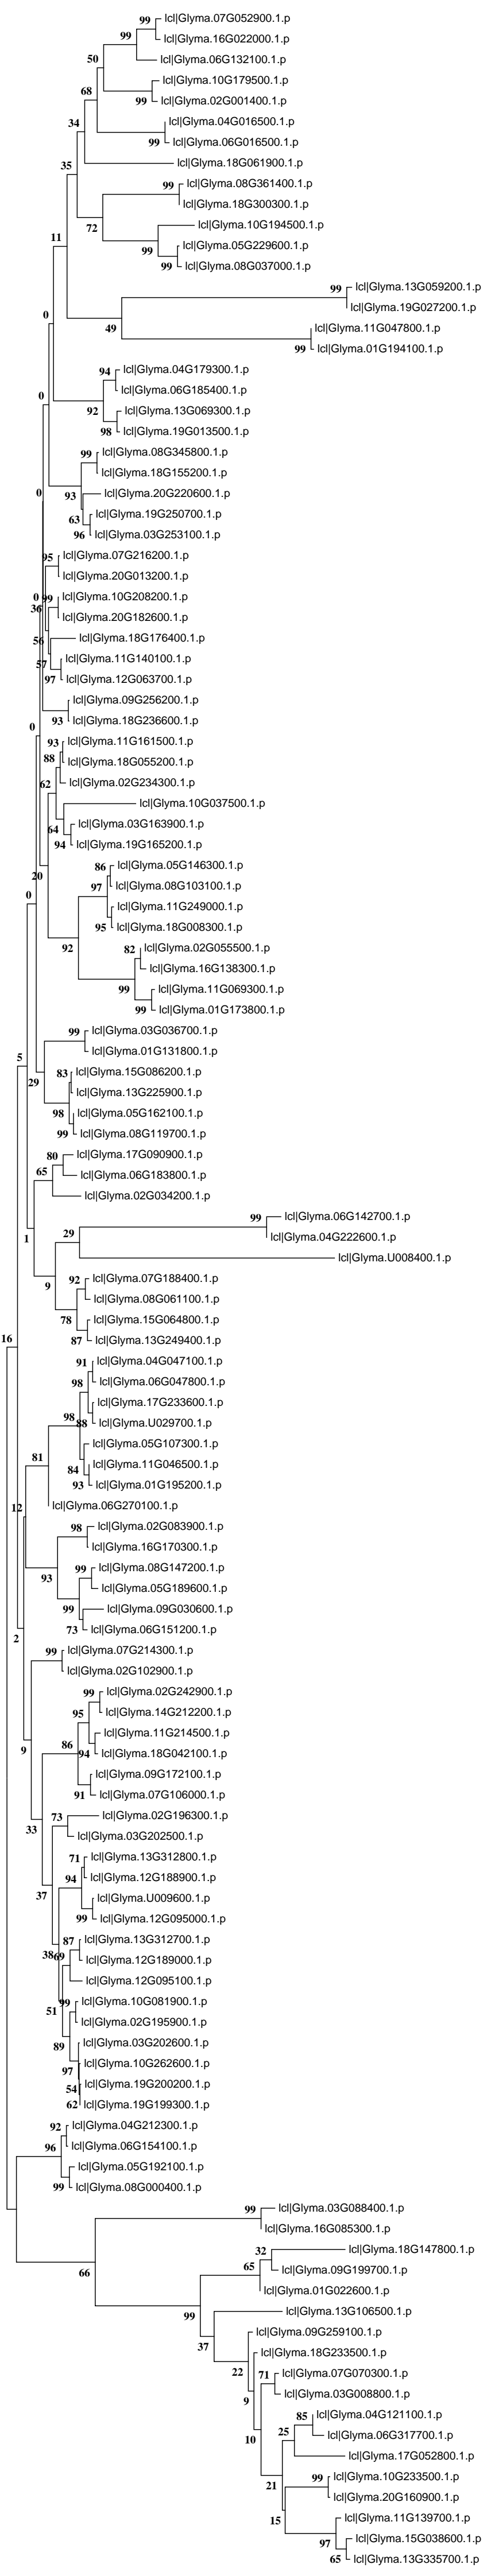

Supplement: 12870_2018_1365_MOESM11_ESM.pdf [file 12870_2018_1365_MOESM11_ESM.pdf]
